# Supplementary material for: Multimodal analysis of methylomics and fragmentomics in plasma cell-free DNA for multi-cancer early detection and localization
Source: eLife. 2023 Oct 11;12:RP89083. doi: 10.7554/eLife.89083 (PMC10567114; doi:10.7554/eLife.89083)
Supplement: Supplementary file 1. — Table S1. Detailed clinical information of all cancer and healthy subjects. Table S2. Summary of clinical information of patients with five cancer types. Table S3. Summary of sequencing quality metrics of samples in both cohorts. Table S4. List of 450 target regions. Table S5. List of significant pathways analyzed by g:Profiler. Table S6. List of 256 4-mer end motifs (EM). Table S7. Comparison of performance between single feature-based models and stacked model. Table S8. The sensitivity of SPOT-MAS (screening for the presence of tumor by methylation and size) model for detecting different cancer types and stages at a specificity of >95%. Table S9. The accurracy of random forest (RF), deep neural network (DNN), and graph convolutional neural network (GCNN) model for tissue of origin (TOO) identification. Table S10. List of significant features for TOO identification. Table S11. Overview of liquid biopsy assays for multi-cancer early detection described in recent publications. [file elife-89083-supp1.xlsx]

## Sheet: Table S1
Table S1 Detailed clinical information of all cancer and healthy subjects
Group	Label	Source	SampleID	Age	Gender	Tumor Stage	Tumor type	Background lesions
								Metastasis	Number of tumor	Tumor diameter
Discovery	Control	Medical Genetics Institute	K0001	54	Female	NA	NA	NA	NA	NA
Discovery	Control	Medical Genetics Institute	K0002R1	44	Female	NA	NA	NA	NA	NA
Discovery	Control	Medical Genetics Institute	K0003	41	Male	NA	NA	NA	NA	NA
Discovery	Control	Medical Genetics Institute	K0004	46	Female	NA	NA	NA	NA	NA
Discovery	Control	Medical Genetics Institute	K0006	61	Female	NA	NA	NA	NA	NA
Discovery	Control	Medical Genetics Institute	K0007	50	Male	NA	NA	NA	NA	NA
Discovery	Control	Medical Genetics Institute	K0008	62	Male	NA	NA	NA	NA	NA
Discovery	Control	Medical Genetics Institute	K0009	66	Female	NA	NA	NA	NA	NA
Discovery	Control	Medical Genetics Institute	K0010	50	Male	NA	NA	NA	NA	NA
Discovery	Control	Medical Genetics Institute	K0011	42	Female	NA	NA	NA	NA	NA
Discovery	Control	Medical Genetics Institute	K0014	42	Female	NA	NA	NA	NA	NA
Discovery	Control	Medical Genetics Institute	K0015	47	Male	NA	NA	NA	NA	NA
Discovery	Control	Medical Genetics Institute	K0016	50	Male	NA	NA	NA	NA	NA
Discovery	Control	Medical Genetics Institute	K0017	40	Male	NA	NA	NA	NA	NA
Discovery	Control	Medical Genetics Institute	K0018	52	Male	NA	NA	NA	NA	NA
Discovery	Control	Medical Genetics Institute	K0019	41	Male	NA	NA	NA	NA	NA
Discovery	Control	Medical Genetics Institute	K0020	40	Female	NA	NA	NA	NA	NA
Discovery	Control	Medical Genetics Institute	K0021	45	Male	NA	NA	NA	NA	NA
Discovery	Control	Medical Genetics Institute	K0022	54	Male	NA	NA	NA	NA	NA
Discovery	Control	Medical Genetics Institute	K0023	55	Male	NA	NA	NA	NA	NA
Discovery	Control	Medical Genetics Institute	K0026	51	Male	NA	NA	NA	NA	NA
Discovery	Control	Medical Genetics Institute	K0027	40	Male	NA	NA	NA	NA	NA
Discovery	Control	Medical Genetics Institute	K0031	58	Male	NA	NA	NA	NA	NA
Discovery	Control	Medical Genetics Institute	K0032	40	Male	NA	NA	NA	NA	NA
Discovery	Control	Medical Genetics Institute	K0033	58	Male	NA	NA	NA	NA	NA
Discovery	Control	Medical Genetics Institute	K0034	59	Male	NA	NA	NA	NA	NA
Discovery	Control	Medical Genetics Institute	K0036R1	54	Female	NA	NA	NA	NA	NA
Discovery	Control	Medical Genetics Institute	K0037	56	Male	NA	NA	NA	NA	NA
Discovery	Control	Medical Genetics Institute	K0038	56	Female	NA	NA	NA	NA	NA
Discovery	Control	Medical Genetics Institute	K0050	45	Male	NA	NA	NA	NA	NA
Discovery	Control	Medical Genetics Institute	K0051	53	Male	NA	NA	NA	NA	NA
Discovery	Control	Medical Genetics Institute	K0052	50	Female	NA	NA	NA	NA	NA
Discovery	Control	Medical Genetics Institute	K0053	41	Male	NA	NA	NA	NA	NA
Discovery	Control	Medical Genetics Institute	K0054	52	Female	NA	NA	NA	NA	NA
Discovery	Control	Medical Genetics Institute	K0055	59	Male	NA	NA	NA	NA	NA
Discovery	Control	Medical Genetics Institute	K0061	42	Male	NA	NA	NA	NA	NA
Discovery	Control	Medical Genetics Institute	K0062	54	Male	NA	NA	NA	NA	NA
Discovery	Control	Medical Genetics Institute	K0064	58	Male	NA	NA	NA	NA	NA
Discovery	Control	Medical Genetics Institute	K0065	42	Female	NA	NA	NA	NA	NA
Discovery	Control	Medical Genetics Institute	K0067	48	Male	NA	NA	NA	NA	NA
Discovery	Control	Medical Genetics Institute	K0068	55	Male	NA	NA	NA	NA	NA
Discovery	Control	Medical Genetics Institute	K0070	40	Female	NA	NA	NA	NA	NA
Discovery	Control	Medical Genetics Institute	K0071	40	Female	NA	NA	NA	NA	NA
Discovery	Control	Medical Genetics Institute	K0072	40	Male	NA	NA	NA	NA	NA
Discovery	Control	Medical Genetics Institute	K0076	43	Male	NA	NA	NA	NA	NA
Discovery	Control	Medical Genetics Institute	K0077	42	Male	NA	NA	NA	NA	NA
Discovery	Control	Medical Genetics Institute	K0078	57	Male	NA	NA	NA	NA	NA
Discovery	Control	Medical Genetics Institute	K0079	52	Male	NA	NA	NA	NA	NA
Discovery	Control	Medical Genetics Institute	K0080	50	Male	NA	NA	NA	NA	NA
Discovery	Control	Medical Genetics Institute	K0085	57	Male	NA	NA	NA	NA	NA
Discovery	Control	Medical Genetics Institute	K0086	52	Male	NA	NA	NA	NA	NA
Discovery	Control	Medical Genetics Institute	K0087	40	Female	NA	NA	NA	NA	NA
Discovery	Control	Medical Genetics Institute	K0088R1	44	Male	NA	NA	NA	NA	NA
Discovery	Control	Medical Genetics Institute	K0092R1	51	Male	NA	NA	NA	NA	NA
Discovery	Control	Medical Genetics Institute	K0093R1	40	Male	NA	NA	NA	NA	NA
Discovery	Control	Medical Genetics Institute	K0094	47	Female	NA	NA	NA	NA	NA
Discovery	Control	Medical Genetics Institute	K0095	54	Male	NA	NA	NA	NA	NA
Discovery	Control	Medical Genetics Institute	K0099	41	Female	NA	NA	NA	NA	NA
Discovery	Control	Medical Genetics Institute	K0100	47	Male	NA	NA	NA	NA	NA
Discovery	Control	Medical Genetics Institute	K0103	67	Female	NA	NA	NA	NA	NA
Discovery	Control	Medical Genetics Institute	K0105R1	51	Female	NA	NA	NA	NA	NA
Discovery	Control	Medical Genetics Institute	K0106	65	Male	NA	NA	NA	NA	NA
Discovery	Control	Medical Genetics Institute	K0107	41	Female	NA	NA	NA	NA	NA
Discovery	Control	Medical Genetics Institute	K0109	53	Female	NA	NA	NA	NA	NA
Discovery	Control	Medical Genetics Institute	K0111	49	Female	NA	NA	NA	NA	NA
Discovery	Control	Medical Genetics Institute	K0114	49	Female	NA	NA	NA	NA	NA
Discovery	Control	Medical Genetics Institute	K0115	62	Female	NA	NA	NA	NA	NA
Discovery	Control	Medical Genetics Institute	K0120	66	Male	NA	NA	NA	NA	NA
Discovery	Control	Medical Genetics Institute	K0122	64	Female	NA	NA	NA	NA	NA
Discovery	Control	Medical Genetics Institute	K0124	44	Female	NA	NA	NA	NA	NA
Discovery	Control	Medical Genetics Institute	K0125R1	40	Female	NA	NA	NA	NA	NA
Discovery	Control	Hanoi Medical University	K0129	65	Male	NA	NA	NA	NA	NA
Discovery	Control	Medical Genetics Institute	K0155	58	Male	NA	NA	NA	NA	NA
Discovery	Control	Medical Genetics Institute	K0156	59	Male	NA	NA	NA	NA	NA
Discovery	Control	Medical Genetics Institute	K0157	58	Male	NA	NA	NA	NA	NA
Discovery	Control	Medical Genetics Institute	K0158	41	Male	NA	NA	NA	NA	NA
Discovery	Control	Medical Genetics Institute	K0161	42	Female	NA	NA	NA	NA	NA
Discovery	Control	Medical Genetics Institute	K0162	51	Female	NA	NA	NA	NA	NA
Discovery	Control	Medical Genetics Institute	K0164	56	Female	NA	NA	NA	NA	NA
Discovery	Control	Medical Genetics Institute	K0165	58	Female	NA	NA	NA	NA	NA
Discovery	Control	Medical Genetics Institute	K0166	43	Male	NA	NA	NA	NA	NA
Discovery	Control	Medical Genetics Institute	K0167	75	Female	NA	NA	NA	NA	NA
Discovery	Control	Medical Genetics Institute	K0169	50	Female	NA	NA	NA	NA	NA
Discovery	Control	Medical Genetics Institute	K0171	44	Male	NA	NA	NA	NA	NA
Discovery	Control	Medical Genetics Institute	K0172	41	Female	NA	NA	NA	NA	NA
Discovery	Control	Medical Genetics Institute	K0173	55	Female	NA	NA	NA	NA	NA
Discovery	Control	Medical Genetics Institute	K0174	60	Male	NA	NA	NA	NA	NA
Discovery	Control	Medical Genetics Institute	K0175	58	Male	NA	NA	NA	NA	NA
Discovery	Control	Medical Genetics Institute	K0176	44	Female	NA	NA	NA	NA	NA
Discovery	Control	Medical Genetics Institute	K0177	50	Female	NA	NA	NA	NA	NA
Discovery	Control	Medical Genetics Institute	K0178	45	Female	NA	NA	NA	NA	NA
Discovery	Control	Medical Genetics Institute	K0183	54	Male	NA	NA	NA	NA	NA
Discovery	Control	Medical Genetics Institute	K0184	42	Female	NA	NA	NA	NA	NA
Discovery	Control	Medical Genetics Institute	K0185	50	Female	NA	NA	NA	NA	NA
Discovery	Control	Medical Genetics Institute	K0186	55	Male	NA	NA	NA	NA	NA
Discovery	Control	Medical Genetics Institute	K0187	57	Male	NA	NA	NA	NA	NA
Discovery	Control	Medical Genetics Institute	K0189	54	Female	NA	NA	NA	NA	NA
Discovery	Control	Medical Genetics Institute	K0190	63	Male	NA	NA	NA	NA	NA
Discovery	Control	Medical Genetics Institute	K0195	47	Male	NA	NA	NA	NA	NA
Discovery	Control	Medical Genetics Institute	K0197	75	Male	NA	NA	NA	NA	NA
Discovery	Control	Medical Genetics Institute	K0198	54	Female	NA	NA	NA	NA	NA
Discovery	Control	Medical Genetics Institute	K0200	40	Female	NA	NA	NA	NA	NA
Discovery	Control	Medical Genetics Institute	K0201	49	Female	NA	NA	NA	NA	NA
Discovery	Control	Medical Genetics Institute	K0203	50	Male	NA	NA	NA	NA	NA
Discovery	Control	Medical Genetics Institute	K0206	53	Female	NA	NA	NA	NA	NA
Discovery	Control	Medical Genetics Institute	K0207	54	Female	NA	NA	NA	NA	NA
Discovery	Control	Medical Genetics Institute	K0208	52	Male	NA	NA	NA	NA	NA
Discovery	Control	Medical Genetics Institute	K0211	57	Male	NA	NA	NA	NA	NA
Discovery	Control	Medical Genetics Institute	K0212	42	Male	NA	NA	NA	NA	NA
Discovery	Control	Medical Genetics Institute	K0215	40	Female	NA	NA	NA	NA	NA
Discovery	Control	Medical Genetics Institute	K0219	45	Male	NA	NA	NA	NA	NA
Discovery	Control	Medical Genetics Institute	K0227	49	Male	NA	NA	NA	NA	NA
Discovery	Control	Medical Genetics Institute	K0228	62	Female	NA	NA	NA	NA	NA
Discovery	Control	Medical Genetics Institute	K0229	52	Female	NA	NA	NA	NA	NA
Discovery	Control	Medical Genetics Institute	K0233	43	Female	NA	NA	NA	NA	NA
Discovery	Control	Medical Genetics Institute	K0244	41	Female	NA	NA	NA	NA	NA
Discovery	Control	Medical Genetics Institute	K0250	42	Male	NA	NA	NA	NA	NA
Discovery	Control	Medical Genetics Institute	K0253	41	Male	NA	NA	NA	NA	NA
Discovery	Control	Medical Genetics Institute	K0257	47	Female	NA	NA	NA	NA	NA
Discovery	Control	Medical Genetics Institute	K0258	64	Female	NA	NA	NA	NA	NA
Discovery	Control	Medical Genetics Institute	K0260	47	Male	NA	NA	NA	NA	NA
Discovery	Control	Medical Genetics Institute	K0261	49	Male	NA	NA	NA	NA	NA
Discovery	Control	Medical Genetics Institute	K0270	57	Female	NA	NA	NA	NA	NA
Discovery	Control	Medical Genetics Institute	K0271	54	Female	NA	NA	NA	NA	NA
Discovery	Control	Medical Genetics Institute	K0272	56	Male	NA	NA	NA	NA	NA
Discovery	Control	Medical Genetics Institute	K0273	52	Female	NA	NA	NA	NA	NA
Discovery	Control	Medical Genetics Institute	K0274	62	Male	NA	NA	NA	NA	NA
Discovery	Control	Medical Genetics Institute	K0275	58	Male	NA	NA	NA	NA	NA
Discovery	Control	Medical Genetics Institute	K0277	51	Male	NA	NA	NA	NA	NA
Discovery	Control	Medical Genetics Institute	K0278	42	Female	NA	NA	NA	NA	NA
Discovery	Control	Medical Genetics Institute	K0279	48	Male	NA	NA	NA	NA	NA
Discovery	Control	Medical Genetics Institute	K0282	47	Female	NA	NA	NA	NA	NA
Discovery	Control	Medical Genetics Institute	K0283	60	Male	NA	NA	NA	NA	NA
Discovery	Control	Medical Genetics Institute	K0285	71	Female	NA	NA	NA	NA	NA
Discovery	Control	Medical Genetics Institute	K0286	45	Female	NA	NA	NA	NA	NA
Discovery	Control	Medical Genetics Institute	K0287	62	Female	NA	NA	NA	NA	NA
Discovery	Control	Medical Genetics Institute	K0288	52	Male	NA	NA	NA	NA	NA
Discovery	Control	Medical Genetics Institute	K0289	45	Male	NA	NA	NA	NA	NA
Discovery	Control	Medical Genetics Institute	K0292	62	Male	NA	NA	NA	NA	NA
Discovery	Control	Medical Genetics Institute	K0293	46	Female	NA	NA	NA	NA	NA
Discovery	Control	Medical Genetics Institute	K0294	42	Female	NA	NA	NA	NA	NA
Discovery	Control	Medical Genetics Institute	K0296	41	Female	NA	NA	NA	NA	NA
Discovery	Control	Medical Genetics Institute	K0303	42	Female	NA	NA	NA	NA	NA
Discovery	Control	Medical Genetics Institute	K0304	46	Female	NA	NA	NA	NA	NA
Discovery	Control	Medical Genetics Institute	K0308	64	Female	NA	NA	NA	NA	NA
Discovery	Control	Medical Genetics Institute	K0311	41	Female	NA	NA	NA	NA	NA
Discovery	Control	Medical Genetics Institute	K0312	45	Male	NA	NA	NA	NA	NA
Discovery	Control	Medical Genetics Institute	K0313	66	Female	NA	NA	NA	NA	NA
Discovery	Control	Medical University of Hochiminh city	K0772	47	Female	NA	NA	NA	NA	NA
Discovery	Control	Medic Medical Center	K0816	68	Female	NA	NA	NA	NA	NA
Discovery	Control	Medic Medical Center	K0817	42	Female	NA	NA	NA	NA	NA
Discovery	Control	Medic Medical Center	K0818	41	Female	NA	NA	NA	NA	NA
Discovery	Control	Medic Medical Center	K0820	42	Female	NA	NA	NA	NA	NA
Discovery	Control	Medical University of Hochiminh city	K0822	58	Female	NA	NA	NA	NA	NA
Discovery	Control	Medical University of Hochiminh city	K0823	57	Female	NA	NA	NA	NA	NA
Discovery	Control	Medic Medical Center	K0861	40	Female	NA	NA	NA	NA	NA
Discovery	Control	Medic Medical Center	K0865	42	Female	NA	NA	NA	NA	NA
Discovery	Control	Medic Medical Center	K0867	40	Female	NA	NA	NA	NA	NA
Discovery	Control	Medic Medical Center	K0870	46	Female	NA	NA	NA	NA	NA
Discovery	Control	Medic Medical Center	K0872	61	Female	NA	NA	NA	NA	NA
Discovery	Control	Medic Medical Center	K0874	59	Male	NA	NA	NA	NA	NA
Discovery	Control	Medic Medical Center	K0875	50	Male	NA	NA	NA	NA	NA
Discovery	Control	Medic Medical Center	K0877	45	Female	NA	NA	NA	NA	NA
Discovery	Control	Medic Medical Center	K0878	48	Female	NA	NA	NA	NA	NA
Discovery	Control	Medic Medical Center	K0879	61	Female	NA	NA	NA	NA	NA
Discovery	Control	Medic Medical Center	K0880	49	Female	NA	NA	NA	NA	NA
Discovery	Control	Medical Genetics Institute	K0903	69	Male	NA	NA	NA	NA	NA
Discovery	Control	Medical University of Hochiminh city	K0920	66	Female	NA	NA	NA	NA	NA
Discovery	Control	Medic Medical Center	K0943	71	Female	NA	NA	NA	NA	NA
Discovery	Control	Medical Genetics Institute	K0987	65	Female	NA	NA	NA	NA	NA
Discovery	Control	Medical Genetics Institute	K0995	68	Male	NA	NA	NA	NA	NA
Discovery	Control	Medical Genetics Institute	K0998	64	Female	NA	NA	NA	NA	NA
Discovery	Control	Medic Medical Center	K1033	52	Female	NA	NA	NA	NA	NA
Discovery	Control	Medic Medical Center	K1041	46	Male	NA	NA	NA	NA	NA
Discovery	Control	Medic Medical Center	K1042	46	Male	NA	NA	NA	NA	NA
Discovery	Control	Medic Medical Center	K1043	50	Male	NA	NA	NA	NA	NA
Discovery	Control	Medic Medical Center	K1044	54	Male	NA	NA	NA	NA	NA
Discovery	Control	Medic Medical Center	K1045	48	Male	NA	NA	NA	NA	NA
Discovery	Control	Medic Medical Center	K1046	55	Female	NA	NA	NA	NA	NA
Discovery	Control	Medic Medical Center	K1048	60	Female	NA	NA	NA	NA	NA
Discovery	Control	Medic Medical Center	K1049	66	Male	NA	NA	NA	NA	NA
Discovery	Control	Medical Genetics Institute	K1051	65	Female	NA	NA	NA	NA	NA
Discovery	Control	Medical Genetics Institute	K1052	56	Male	NA	NA	NA	NA	NA
Discovery	Control	Medical Genetics Institute	K1056	50	Female	NA	NA	NA	NA	NA
Discovery	Control	Medical Genetics Institute	K1057	48	Female	NA	NA	NA	NA	NA
Discovery	Control	Medical Genetics Institute	K1063	54	Female	NA	NA	NA	NA	NA
Discovery	Control	Medical Genetics Institute	K1069	53	Male	NA	NA	NA	NA	NA
Discovery	Control	Medical Genetics Institute	K1076	49	Female	NA	NA	NA	NA	NA
Discovery	Control	Medical University of Hochiminh city	K1080	48	Female	NA	NA	NA	NA	NA
Discovery	Control	Medical Genetics Institute	K1081	53	Male	NA	NA	NA	NA	NA
Discovery	Control	Medic Medical Center	K1083	42	Female	NA	NA	NA	NA	NA
Discovery	Control	Medical Genetics Institute	K1084	59	Female	NA	NA	NA	NA	NA
Discovery	Control	Medical Genetics Institute	K1090	51	Female	NA	NA	NA	NA	NA
Discovery	Control	Medic Medical Center	K1105	42	Female	NA	NA	NA	NA	NA
Discovery	Control	Medical University of Hochiminh city	K1125	42	Female	NA	NA	NA	NA	NA
Discovery	Control	Medical University of Hochiminh city	K1139	46	Female	NA	NA	NA	NA	NA
Discovery	Control	Medic Medical Center	K1182	62	Female	NA	NA	NA	NA	NA
Discovery	Control	Medical Genetics Institute	K1189	47	Female	NA	NA	NA	NA	NA
Discovery	Control	Medical Genetics Institute	K1196	63	Female	NA	NA	NA	NA	NA
Discovery	Control	Medical Genetics Institute	K1204	53	Female	NA	NA	NA	NA	NA
Discovery	Control	Medical Genetics Institute	K1211	41	Female	NA	NA	NA	NA	NA
Discovery	Control	Medical Genetics Institute	K1213	41	Female	NA	NA	NA	NA	NA
Discovery	Control	Medic Medical Center	K1216	64	Female	NA	NA	NA	NA	NA
Discovery	Control	Medical University of Hochiminh city	K1320	66	Female	NA	NA	NA	NA	NA
Discovery	Control	Medical Genetics Institute	K1377	50	Male	NA	NA	NA	NA	NA
Discovery	Control	Medical Genetics Institute	K1381	55	Male	NA	NA	NA	NA	NA
Discovery	Control	Medical Genetics Institute	K1389	44	Male	NA	NA	NA	NA	NA
Discovery	Control	Medical Genetics Institute	K1397	46	Male	NA	NA	NA	NA	NA
Discovery	Control	Medical Genetics Institute	K1398	50	Male	NA	NA	NA	NA	NA
Discovery	Control	Medical Genetics Institute	K1399	55	Female	NA	NA	NA	NA	NA
Discovery	Control	Medical Genetics Institute	K1400	47	Male	NA	NA	NA	NA	NA
Discovery	Control	Medical Genetics Institute	K1401	59	Male	NA	NA	NA	NA	NA
Discovery	Control	Medical Genetics Institute	K1402	59	Male	NA	NA	NA	NA	NA
Discovery	Control	Medical Genetics Institute	K1403	45	Female	NA	NA	NA	NA	NA
Discovery	Control	Medical Genetics Institute	K1409	61	Male	NA	NA	NA	NA	NA
Discovery	Control	Medical Genetics Institute	K1410	50	Male	NA	NA	NA	NA	NA
Discovery	Control	Medical Genetics Institute	K1411	50	Male	NA	NA	NA	NA	NA
Discovery	Control	Medical Genetics Institute	K1412	45	Female	NA	NA	NA	NA	NA
Discovery	Control	Medical Genetics Institute	K1413	44	Male	NA	NA	NA	NA	NA
Discovery	Control	Medical Genetics Institute	K1414	52	Female	NA	NA	NA	NA	NA
Discovery	Control	Medical Genetics Institute	K1415	49	Male	NA	NA	NA	NA	NA
Discovery	Control	Medical Genetics Institute	K1416	41	Female	NA	NA	NA	NA	NA
Discovery	Control	Medical Genetics Institute	K1418	48	Female	NA	NA	NA	NA	NA
Discovery	Control	Medical Genetics Institute	K1419	59	Male	NA	NA	NA	NA	NA
Discovery	Control	Medical Genetics Institute	K1421	42	Female	NA	NA	NA	NA	NA
Discovery	Control	Medical Genetics Institute	K1422	49	Female	NA	NA	NA	NA	NA
Discovery	Control	Medical Genetics Institute	K1423	46	Male	NA	NA	NA	NA	NA
Discovery	Control	Medical Genetics Institute	K1464	40	Female	NA	NA	NA	NA	NA
Discovery	Control	Medical Genetics Institute	K1465	82	Male	NA	NA	NA	NA	NA
Discovery	Control	Medical Genetics Institute	K1466	56	Male	NA	NA	NA	NA	NA
Discovery	Control	Medical Genetics Institute	K1468	67	Male	NA	NA	NA	NA	NA
Discovery	Control	Medical Genetics Institute	K1470	48	Female	NA	NA	NA	NA	NA
Discovery	Control	Medical Genetics Institute	K1474	50	Female	NA	NA	NA	NA	NA
Discovery	Control	Medical Genetics Institute	K1477	40	Male	NA	NA	NA	NA	NA
Discovery	Control	Medical Genetics Institute	K1478	48	Female	NA	NA	NA	NA	NA
Discovery	Control	Medical Genetics Institute	K1479	62	Female	NA	NA	NA	NA	NA
Discovery	Control	Medical Genetics Institute	K1504	59	Female	NA	NA	NA	NA	NA
Discovery	Control	Medical Genetics Institute	K1505	59	Female	NA	NA	NA	NA	NA
Discovery	Control	Medical Genetics Institute	K1506	59	Male	NA	NA	NA	NA	NA
Discovery	Control	Medical Genetics Institute	K1507	58	Female	NA	NA	NA	NA	NA
Discovery	Control	Medical Genetics Institute	K1508	47	Female	NA	NA	NA	NA	NA
Discovery	Control	Medical Genetics Institute	K1509	53	Female	NA	NA	NA	NA	NA
Discovery	Control	Medical Genetics Institute	K1526	64	Female	NA	NA	NA	NA	NA
Discovery	Control	Medical Genetics Institute	K1527	59	Male	NA	NA	NA	NA	NA
Discovery	Control	Medical Genetics Institute	K1528	52	Male	NA	NA	NA	NA	NA
Discovery	Control	Medical Genetics Institute	K1530	46	Female	NA	NA	NA	NA	NA
Discovery	Control	Medical Genetics Institute	K1531	57	Male	NA	NA	NA	NA	NA
Discovery	Control	Medical Genetics Institute	K1533	50	Female	NA	NA	NA	NA	NA
Discovery	Control	Medical Genetics Institute	K1535	52	Male	NA	NA	NA	NA	NA
Discovery	Control	Medical Genetics Institute	K1539	50	Female	NA	NA	NA	NA	NA
Discovery	Control	Medical Genetics Institute	K1540	52	Female	NA	NA	NA	NA	NA
Discovery	Control	Medical Genetics Institute	K1541	63	Male	NA	NA	NA	NA	NA
Discovery	Control	Medical Genetics Institute	K1543	63	Female	NA	NA	NA	NA	NA
Discovery	Control	Medical Genetics Institute	K1545	58	Male	NA	NA	NA	NA	NA
Discovery	Control	Hanoi Medical University	K1563	40	Male	NA	NA	NA	NA	NA
Discovery	Control	Hanoi Medical University	K1565	51	Male	NA	NA	NA	NA	NA
Discovery	Control	Hanoi Medical University	K1566	43	Male	NA	NA	NA	NA	NA
Discovery	Control	Medical Genetics Institute	K1631	46	Male	NA	NA	NA	NA	NA
Discovery	Control	Medical Genetics Institute	K1632	52	Male	NA	NA	NA	NA	NA
Discovery	Control	Medical Genetics Institute	K1633	60	Female	NA	NA	NA	NA	NA
Discovery	Control	Medical Genetics Institute	K1635	47	Male	NA	NA	NA	NA	NA
Discovery	Control	Medical Genetics Institute	K1636	52	Male	NA	NA	NA	NA	NA
Discovery	Control	Medical Genetics Institute	K1637	44	Female	NA	NA	NA	NA	NA
Discovery	Control	Medical Genetics Institute	K1638	63	Female	NA	NA	NA	NA	NA
Discovery	Control	Medical Genetics Institute	K1639	44	Male	NA	NA	NA	NA	NA
Discovery	Control	Medical Genetics Institute	K1640	43	Female	NA	NA	NA	NA	NA
Discovery	Control	Medical Genetics Institute	K1641	45	Female	NA	NA	NA	NA	NA
Discovery	Control	Medical Genetics Institute	K1642	48	Female	NA	NA	NA	NA	NA
Discovery	Control	Medical Genetics Institute	K1643	47	Female	NA	NA	NA	NA	NA
Discovery	Control	Medical Genetics Institute	K1645	47	Female	NA	NA	NA	NA	NA
Discovery	Control	Medical Genetics Institute	K1647	46	Male	NA	NA	NA	NA	NA
Discovery	Control	Medical Genetics Institute	K1657	50	Male	NA	NA	NA	NA	NA
Discovery	Control	Medical Genetics Institute	K1662	44	Male	NA	NA	NA	NA	NA
Discovery	Control	Medical Genetics Institute	K1664	49	Male	NA	NA	NA	NA	NA
Discovery	Control	Medical Genetics Institute	K1667	55	Female	NA	NA	NA	NA	NA
Discovery	Control	Medical Genetics Institute	K1668	55	Female	NA	NA	NA	NA	NA
Discovery	Control	Medical Genetics Institute	K1691	48	Male	NA	NA	NA	NA	NA
Discovery	Control	Medical Genetics Institute	K1692	58	Male	NA	NA	NA	NA	NA
Discovery	Control	Medical Genetics Institute	K1693	52	Female	NA	NA	NA	NA	NA
Discovery	Control	Medical Genetics Institute	K1694	62	Male	NA	NA	NA	NA	NA
Discovery	Control	Medical Genetics Institute	K1695	58	Female	NA	NA	NA	NA	NA
Discovery	Control	Medical Genetics Institute	K1696	53	Male	NA	NA	NA	NA	NA
Discovery	Control	Medical Genetics Institute	K1697	61	Female	NA	NA	NA	NA	NA
Discovery	Control	Medical Genetics Institute	K1715	45	Female	NA	NA	NA	NA	NA
Discovery	Control	Medical Genetics Institute	K1773	43	Male	NA	NA	NA	NA	NA
Discovery	Control	Medical Genetics Institute	K1826	54	Male	NA	NA	NA	NA	NA
Discovery	Control	Medical Genetics Institute	K1848	52	Male	NA	NA	NA	NA	NA
Discovery	Control	Medical Genetics Institute	K1904	53	Female	NA	NA	NA	NA	NA
Discovery	Control	Medical Genetics Institute	K1914	41	Female	NA	NA	NA	NA	NA
Discovery	Control	Medical Genetics Institute	K1917	44	Female	NA	NA	NA	NA	NA
Discovery	Control	Medical Genetics Institute	K1918	43	Female	NA	NA	NA	NA	NA
Discovery	Control	Medical Genetics Institute	K1919	50	Female	NA	NA	NA	NA	NA
Discovery	Control	Medical Genetics Institute	K1921	49	Female	NA	NA	NA	NA	NA
Discovery	Control	Medical Genetics Institute	K1922	47	Female	NA	NA	NA	NA	NA
Discovery	Control	Medical Genetics Institute	K1924	42	Female	NA	NA	NA	NA	NA
Discovery	Control	Medical Genetics Institute	K1925	48	Female	NA	NA	NA	NA	NA
Discovery	Control	Medical Genetics Institute	K1926	41	Male	NA	NA	NA	NA	NA
Discovery	Control	Medical Genetics Institute	K1930	43	Female	NA	NA	NA	NA	NA
Discovery	Control	Medical Genetics Institute	K1931	44	Female	NA	NA	NA	NA	NA
Discovery	Control	Medical Genetics Institute	K1932	51	Male	NA	NA	NA	NA	NA
Discovery	Control	Medical Genetics Institute	K1933	57	Female	NA	NA	NA	NA	NA
Discovery	Control	Medical Genetics Institute	K1936	55	Male	NA	NA	NA	NA	NA
Discovery	Control	Medical Genetics Institute	K1937	49	Female	NA	NA	NA	NA	NA
Discovery	Control	Medical Genetics Institute	K1938	51	Male	NA	NA	NA	NA	NA
Discovery	Control	Medical Genetics Institute	K1986	68	Male	NA	NA	NA	NA	NA
Discovery	Control	Medical Genetics Institute	K1AA94	68	Male	NA	NA	NA	NA	NA
Discovery	Control	Medical Genetics Institute	K1AB17	68	Female	NA	NA	NA	NA	NA
Discovery	Control	Medical Genetics Institute	K1AB51	74	Female	NA	NA	NA	NA	NA
Discovery	Control	Medical Genetics Institute	K1AB55	69	Female	NA	NA	NA	NA	NA
Discovery	Control	Medical Genetics Institute	K1AB62	53	Male	NA	NA	NA	NA	NA
Discovery	Control	Medical Genetics Institute	K1AB63	52	Male	NA	NA	NA	NA	NA
Discovery	Control	Medical Genetics Institute	K1AB64	50	Male	NA	NA	NA	NA	NA
Discovery	Control	Medical Genetics Institute	K1AB65	47	Male	NA	NA	NA	NA	NA
Discovery	Control	Medical Genetics Institute	K1AB66	58	Female	NA	NA	NA	NA	NA
Discovery	Control	Medical Genetics Institute	K1AB67	33	Female	NA	NA	NA	NA	NA
Discovery	Control	Medical Genetics Institute	K1AB68	39	Male	NA	NA	NA	NA	NA
Discovery	Control	Medical Genetics Institute	K1AB69	51	Male	NA	NA	NA	NA	NA
Discovery	Control	Medical Genetics Institute	K1AB70	57	Male	NA	NA	NA	NA	NA
Discovery	Control	Medical Genetics Institute	K1AB71	57	Male	NA	NA	NA	NA	NA
Discovery	Control	Medical Genetics Institute	K1AB73	72	Male	NA	NA	NA	NA	NA
Discovery	Control	Medical Genetics Institute	K1AB74	50	Female	NA	NA	NA	NA	NA
Discovery	Control	Medical Genetics Institute	K2000	47	Female	NA	NA	NA	NA	NA
Discovery	Control	Medical Genetics Institute	K2004	42	Female	NA	NA	NA	NA	NA
Discovery	Control	Medical Genetics Institute	K2013	57	Male	NA	NA	NA	NA	NA
Discovery	Control	Medical Genetics Institute	K2014	46	Female	NA	NA	NA	NA	NA
Discovery	Control	Medical Genetics Institute	K2015	59	Female	NA	NA	NA	NA	NA
Discovery	Control	Medical Genetics Institute	K2016	48	Female	NA	NA	NA	NA	NA
Discovery	Control	Medical Genetics Institute	K2017	55	Male	NA	NA	NA	NA	NA
Discovery	Control	Medical Genetics Institute	K2018	57	Male	NA	NA	NA	NA	NA
Discovery	Control	Medical Genetics Institute	K2020	47	Female	NA	NA	NA	NA	NA
Discovery	Control	Medical Genetics Institute	K2021	44	Male	NA	NA	NA	NA	NA
Discovery	Control	Medical Genetics Institute	K2027	40	Female	NA	NA	NA	NA	NA
Discovery	Control	Medical Genetics Institute	K2032	41	Female	NA	NA	NA	NA	NA
Discovery	Control	Medical Genetics Institute	K2033	43	Female	NA	NA	NA	NA	NA
Discovery	Control	Medical Genetics Institute	K2034	41	Female	NA	NA	NA	NA	NA
Discovery	Control	Medical Genetics Institute	K2036	49	Female	NA	NA	NA	NA	NA
Discovery	Control	Medical Genetics Institute	K2054	42	Female	NA	NA	NA	NA	NA
Discovery	Control	Medical Genetics Institute	K2063	52	Female	NA	NA	NA	NA	NA
Discovery	Control	Medical Genetics Institute	K2064	46	Female	NA	NA	NA	NA	NA
Discovery	Control	Medical Genetics Institute	K2065	50	Female	NA	NA	NA	NA	NA
Discovery	Control	Medical Genetics Institute	K2067	41	Female	NA	NA	NA	NA	NA
Discovery	Control	Medical Genetics Institute	K2069	48	Male	NA	NA	NA	NA	NA
Discovery	Control	Medical Genetics Institute	K2071	63	Female	NA	NA	NA	NA	NA
Discovery	Control	Medical Genetics Institute	K2074	43	Female	NA	NA	NA	NA	NA
Discovery	Control	Medical Genetics Institute	K2075	45	Female	NA	NA	NA	NA	NA
Discovery	Control	Medical Genetics Institute	K2077	42	Female	NA	NA	NA	NA	NA
Discovery	Control	Medical Genetics Institute	K2084	50	Female	NA	NA	NA	NA	NA
Discovery	Control	Medical Genetics Institute	K2122	40	Male	NA	NA	NA	NA	NA
Discovery	Control	Medical Genetics Institute	K2211	48	Female	NA	NA	NA	NA	NA
Discovery	Control	Hanoi Medical University	K2252	54	Female	NA	NA	NA	NA	NA
Discovery	Control	Hanoi Medical University	K2256	54	Male	NA	NA	NA	NA	NA
Discovery	Control	Hanoi Medical University	K2266	44	Male	NA	NA	NA	NA	NA
Discovery	Control	Hanoi Medical University	K2324	52	Male	NA	NA	NA	NA	NA
Discovery	Control	Hanoi Medical University	K2325	58	Male	NA	NA	NA	NA	NA
Discovery	Control	Hanoi Medical University	K2329	51	Female	NA	NA	NA	NA	NA
Discovery	Control	Hanoi Medical University	K2330	53	Male	NA	NA	NA	NA	NA
Discovery	Control	Hanoi Medical University	K2331	52	Female	NA	NA	NA	NA	NA
Discovery	Control	Hanoi Medical University	K2332	59	Female	NA	NA	NA	NA	NA
Discovery	Control	Hanoi Medical University	K2336	40	Female	NA	NA	NA	NA	NA
Discovery	Control	Hanoi Medical University	K2337	42	Male	NA	NA	NA	NA	NA
Discovery	Control	Hanoi Medical University	K2344	60	Male	NA	NA	NA	NA	NA
Discovery	Control	Hanoi Medical University	K2347	42	Female	NA	NA	NA	NA	NA
Discovery	Control	Hanoi Medical University	K2348	47	Male	NA	NA	NA	NA	NA
Discovery	Control	Hanoi Medical University	K2410	57	Male	NA	NA	NA	NA	NA
Discovery	Control	Hanoi Medical University	K2499	69	Male	NA	NA	NA	NA	NA
Discovery	Control	Hanoi Medical University	K2500	54	Female	NA	NA	NA	NA	NA
Discovery	Control	Hanoi Medical University	K2501	41	Female	NA	NA	NA	NA	NA
Discovery	Control	Hanoi Medical University	K2502	51	Female	NA	NA	NA	NA	NA
Discovery	Control	Hanoi Medical University	K2503	54	Male	NA	NA	NA	NA	NA
Discovery	Control	Hanoi Medical University	K2504	54	Male	NA	NA	NA	NA	NA
Discovery	Control	Medical Genetics Institute	K2567	61	Female	NA	NA	NA	NA	NA
Discovery	Control	Medical Genetics Institute	K2584	66	Female	NA	NA	NA	NA	NA
Discovery	Control	Medical Genetics Institute	K2585	68	Female	NA	NA	NA	NA	NA
Discovery	Control	Medical Genetics Institute	K6AA11	66	Female	NA	NA	NA	NA	NA
Discovery	Control	Medical Genetics Institute	K6AA12	35	Male	NA	NA	NA	NA	NA
Discovery	Control	Medical Genetics Institute	K6AA13	57	Female	NA	NA	NA	NA	NA
Discovery	Control	Medical Genetics Institute	K6AA14	59	Female	NA	NA	NA	NA	NA
Discovery	Control	Medical Genetics Institute	KAAA18	59	Female	NA	NA	NA	NA	NA
Discovery	Control	Medical Genetics Institute	KAAA19	54	Female	NA	NA	NA	NA	NA
Discovery	Control	Medical Genetics Institute	KAAA20	44	Female	NA	NA	NA	NA	NA
Discovery	Control	Medical Genetics Institute	KAAA21	33	Female	NA	NA	NA	NA	NA
Discovery	Control	Medical Genetics Institute	KAAA22	50	Male	NA	NA	NA	NA	NA
Discovery	Control	Medical Genetics Institute	KAAA23	44	Male	NA	NA	NA	NA	NA
Discovery	Control	Medical Genetics Institute	KAAA24	47	Male	NA	NA	NA	NA	NA
Discovery	Control	Medical Genetics Institute	KAAA25	50	Male	NA	NA	NA	NA	NA
Discovery	Control	Medical Genetics Institute	KAAA27	40	Male	NA	NA	NA	NA	NA
Discovery	Control	Medical Genetics Institute	KAAA28	35	Female	NA	NA	NA	NA	NA
Discovery	Control	Medical Genetics Institute	KAAA29	42	Male	NA	NA	NA	NA	NA
Discovery	Control	Medical Genetics Institute	KAAA31	44	Female	NA	NA	NA	NA	NA
Discovery	Control	Medical Genetics Institute	KAAA32	62	Female	NA	NA	NA	NA	NA
Discovery	Control	Medical Genetics Institute	KAAA33	56	Female	NA	NA	NA	NA	NA
Discovery	Control	Medical Genetics Institute	KAAA34	32	Male	NA	NA	NA	NA	NA
Discovery	Control	Medical Genetics Institute	KAAA35	31	Female	NA	NA	NA	NA	NA
Discovery	Control	Medical Genetics Institute	KAAA37	36	Female	NA	NA	NA	NA	NA
Discovery	Control	Medical Genetics Institute	KAAA38	36	Male	NA	NA	NA	NA	NA
Discovery	Control	Medical Genetics Institute	KAAA39	41	Male	NA	NA	NA	NA	NA
Discovery	Control	Medical Genetics Institute	KAAA40	40	Female	NA	NA	NA	NA	NA
Discovery	Control	Medical Genetics Institute	KAAA41	40	Male	NA	NA	NA	NA	NA
Discovery	Control	Medical Genetics Institute	KAAA42	43	Male	NA	NA	NA	NA	NA
Discovery	Control	Medical Genetics Institute	KAAA43	41	Female	NA	NA	NA	NA	NA
Discovery	Control	Medical Genetics Institute	KAAA47	38	Male	NA	NA	NA	NA	NA
Discovery	Control	Medical Genetics Institute	KAAA51	54	Female	NA	NA	NA	NA	NA
Discovery	Control	Medical Genetics Institute	KAAA54	37	Female	NA	NA	NA	NA	NA
Discovery	Control	Medical Genetics Institute	KAAA55	50	Female	NA	NA	NA	NA	NA
Discovery	Control	Medical Genetics Institute	KAAA56	51	Male	NA	NA	NA	NA	NA
Discovery	Control	Medical Genetics Institute	KAAA57	70	Female	NA	NA	NA	NA	NA
Discovery	Control	Medical Genetics Institute	KAAA58	38	Female	NA	NA	NA	NA	NA
Discovery	Control	Medical Genetics Institute	KAAA59	38	Male	NA	NA	NA	NA	NA
Discovery	Control	Medical Genetics Institute	KAAA63	60	Male	NA	NA	NA	NA	NA
Discovery	Control	Medical Genetics Institute	KAAA65	33	Female	NA	NA	NA	NA	NA
Discovery	Control	Medical Genetics Institute	KAAA69	41	Male	NA	NA	NA	NA	NA
Discovery	Control	Medical Genetics Institute	KAAA78	53	Male	NA	NA	NA	NA	NA
Discovery	Control	Medical Genetics Institute	KAAA79	51	Female	NA	NA	NA	NA	NA
Discovery	Control	Medical Genetics Institute	KAAA81	58	Female	NA	NA	NA	NA	NA
Discovery	Control	Medical Genetics Institute	KAAA83	53	Female	NA	NA	NA	NA	NA
Discovery	Control	Medical Genetics Institute	KAAA84	55	Male	NA	NA	NA	NA	NA
Discovery	Control	Medical Genetics Institute	KAAA85	34	Male	NA	NA	NA	NA	NA
Discovery	Control	Medical Genetics Institute	KAAA87	60	Female	NA	NA	NA	NA	NA
Discovery	Control	Medical Genetics Institute	KAAA92	43	Female	NA	NA	NA	NA	NA
Discovery	Control	Medical Genetics Institute	KAAA94	34	Female	NA	NA	NA	NA	NA
Discovery	Control	Medical Genetics Institute	KAAA95	38	Male	NA	NA	NA	NA	NA
Discovery	Control	Medical Genetics Institute	KAAA97	60	Female	NA	NA	NA	NA	NA
Discovery	Control	Medical Genetics Institute	KAAA98	45	Male	NA	NA	NA	NA	NA
Discovery	Control	Medical Genetics Institute	KAAA99	34	Male	NA	NA	NA	NA	NA
Discovery	Control	Medical Genetics Institute	KAAB01	40	Female	NA	NA	NA	NA	NA
Discovery	Control	Medical Genetics Institute	KAAB03	57	Male	NA	NA	NA	NA	NA
Discovery	Control	Medical Genetics Institute	KAAB04	52	Male	NA	NA	NA	NA	NA
Discovery	Control	Medical Genetics Institute	KAAB06	53	Female	NA	NA	NA	NA	NA
Discovery	Control	Medical Genetics Institute	KAAB11	49	Female	NA	NA	NA	NA	NA
Discovery	Control	Medical Genetics Institute	KAAB12	45	Female	NA	NA	NA	NA	NA
Discovery	Control	Medical Genetics Institute	KAAB13	35	Female	NA	NA	NA	NA	NA
Discovery	Control	Medical Genetics Institute	KAAB14	34	Male	NA	NA	NA	NA	NA
Discovery	Control	Medical Genetics Institute	KAAB18	56	Male	NA	NA	NA	NA	NA
Discovery	Control	Medical Genetics Institute	KAAB21	58	Female	NA	NA	NA	NA	NA
Discovery	Control	Medical Genetics Institute	KAAB22	61	Male	NA	NA	NA	NA	NA
Discovery	Control	Medical Genetics Institute	KAAB24	39	Female	NA	NA	NA	NA	NA
Discovery	Control	Medical Genetics Institute	KAAB27	35	Female	NA	NA	NA	NA	NA
Discovery	Control	Medical Genetics Institute	KAAB29	30	Male	NA	NA	NA	NA	NA
Discovery	Control	Medical Genetics Institute	KAAB31	30	Female	NA	NA	NA	NA	NA
Discovery	Control	Medical Genetics Institute	KAAB32	38	Male	NA	NA	NA	NA	NA
Discovery	Control	Medical Genetics Institute	KAAB33	34	Female	NA	NA	NA	NA	NA
Discovery	Control	Medical Genetics Institute	KAAB34	37	Female	NA	NA	NA	NA	NA
Discovery	Control	Medical Genetics Institute	KAAB35	39	Female	NA	NA	NA	NA	NA
Discovery	Control	Medical Genetics Institute	KAAB36	39	Male	NA	NA	NA	NA	NA
Discovery	Control	Medical Genetics Institute	KAAB37	46	Male	NA	NA	NA	NA	NA
Discovery	Control	Medical Genetics Institute	KAAB40	37	Female	NA	NA	NA	NA	NA
Discovery	Control	Medical Genetics Institute	KAAB43	42	Female	NA	NA	NA	NA	NA
Discovery	Control	Medical Genetics Institute	KAAB46	55	Female	NA	NA	NA	NA	NA
Discovery	Control	Medical Genetics Institute	KAAB48	56	Female	NA	NA	NA	NA	NA
Discovery	Control	Medical Genetics Institute	KAAB49	43	Female	NA	NA	NA	NA	NA
Discovery	Control	Medical Genetics Institute	KAAB54	32	Male	NA	NA	NA	NA	NA
Discovery	Control	Medical Genetics Institute	KAAB55	65	Female	NA	NA	NA	NA	NA
Discovery	Control	Medical Genetics Institute	KAAB61	46	Female	NA	NA	NA	NA	NA
Discovery	Control	Medical Genetics Institute	KAAB62	45	Male	NA	NA	NA	NA	NA
Discovery	Control	Medical Genetics Institute	KAAB63	44	Female	NA	NA	NA	NA	NA
Discovery	Control	Medical Genetics Institute	KAAB71	66	Female	NA	NA	NA	NA	NA
Discovery	Control	Medical Genetics Institute	KAAB76	42	Female	NA	NA	NA	NA	NA
Discovery	Control	Medical Genetics Institute	KAAB83	62	Male	NA	NA	NA	NA	NA
Discovery	Control	Medical Genetics Institute	KAAB94	40	Female	NA	NA	NA	NA	NA
Discovery	Control	Medical Genetics Institute	KAAF01	40	Female	NA	NA	NA	NA	NA
Discovery	Control	Medical Genetics Institute	KAAF64	49	Male	NA	NA	NA	NA	NA
Discovery	Control	Medical Genetics Institute	KAAF66	40	Female	NA	NA	NA	NA	NA
Discovery	Control	Medical Genetics Institute	KAAF67	42	Female	NA	NA	NA	NA	NA
Discovery	Control	Medical Genetics Institute	KAAF70	50	Male	NA	NA	NA	NA	NA
Discovery	Control	Medical Genetics Institute	KAAF75	40	Female	NA	NA	NA	NA	NA
Discovery	Control	Medical Genetics Institute	KAAF76	57	Female	NA	NA	NA	NA	NA
Discovery	Control	Medical Genetics Institute	KAAF78	47	Female	NA	NA	NA	NA	NA
Discovery	Control	Medical Genetics Institute	KAAF79	52	Female	NA	NA	NA	NA	NA
Discovery	Control	Medical Genetics Institute	KAAF97	45	Male	NA	NA	NA	NA	NA
Discovery	Control	Medical Genetics Institute	KAAF98	41	Male	NA	NA	NA	NA	NA
Discovery	Control	Medical Genetics Institute	KAAF99	41	Female	NA	NA	NA	NA	NA
Discovery	Control	Medical Genetics Institute	KAAG01	56	Female	NA	NA	NA	NA	NA
Discovery	Control	Medical Genetics Institute	KAAG02	58	Male	NA	NA	NA	NA	NA
Discovery	Control	Medical Genetics Institute	KAAG04	46	Female	NA	NA	NA	NA	NA
Discovery	Control	Medical Genetics Institute	KAAG05	53	Male	NA	NA	NA	NA	NA
Discovery	Control	Medical Genetics Institute	KAAG07	66	Female	NA	NA	NA	NA	NA
Discovery	Control	Medical Genetics Institute	KAAG10	37	Male	NA	NA	NA	NA	NA
Discovery	Control	Medical Genetics Institute	KAAG22	37	Female	NA	NA	NA	NA	NA
Discovery	Control	Medical Genetics Institute	KAAG26	51	Male	NA	NA	NA	NA	NA
Discovery	Control	Medical Genetics Institute	KAAG27	40	Female	NA	NA	NA	NA	NA
Discovery	Control	Medical Genetics Institute	KAAG28	59	Female	NA	NA	NA	NA	NA
Discovery	Control	Medical Genetics Institute	KAAG30	54	Female	NA	NA	NA	NA	NA
Discovery	Control	Medical Genetics Institute	KAAG32	52	Female	NA	NA	NA	NA	NA
Discovery	Control	Medical Genetics Institute	KAAG33	47	Female	NA	NA	NA	NA	NA
Discovery	Control	Medical Genetics Institute	KAAG35	56	Female	NA	NA	NA	NA	NA
Discovery	Control	Medical Genetics Institute	KAAG36	44	Female	NA	NA	NA	NA	NA
Discovery	Control	Medical Genetics Institute	KAAG38	32	Male	NA	NA	NA	NA	NA
Discovery	Control	Medical Genetics Institute	KAAG40	53	Female	NA	NA	NA	NA	NA
Discovery	Control	Medical Genetics Institute	KAAG42	51	Male	NA	NA	NA	NA	NA
Discovery	Control	Medical Genetics Institute	KAAG43	43	Male	NA	NA	NA	NA	NA
Discovery	Control	Medical Genetics Institute	KAAG44	39	Male	NA	NA	NA	NA	NA
Discovery	Control	Medical Genetics Institute	KAAG55	47	Male	NA	NA	NA	NA	NA
Discovery	Control	Medical Genetics Institute	KAAG56	47	Male	NA	NA	NA	NA	NA
Discovery	Control	Medical Genetics Institute	KAAG69	50	Female	NA	NA	NA	NA	NA
Discovery	Control	Medical Genetics Institute	KAAG70	57	Female	NA	NA	NA	NA	NA
Discovery	Control	Medical Genetics Institute	KAAG80	56	Female	NA	NA	NA	NA	NA
Discovery	Control	Medical Genetics Institute	KAAG85	33	Female	NA	NA	NA	NA	NA
Discovery	Control	Medical Genetics Institute	KAAG87	48	Male	NA	NA	NA	NA	NA
Discovery	Control	Medical Genetics Institute	KAAG88	52	Male	NA	NA	NA	NA	NA
Discovery	Control	Medical Genetics Institute	KAAG89	34	Female	NA	NA	NA	NA	NA
Discovery	Control	Medical Genetics Institute	KAAG92	84	Female	NA	NA	NA	NA	NA
Discovery	Control	Medical Genetics Institute	KAAG93	53	Female	NA	NA	NA	NA	NA
Discovery	Control	Medical Genetics Institute	KAAG94	46	Female	NA	NA	NA	NA	NA
Discovery	Control	Medical Genetics Institute	KAAH16	31	Male	NA	NA	NA	NA	NA
Discovery	Control	Medical Genetics Institute	KAAH17	38	Female	NA	NA	NA	NA	NA
Discovery	Control	Medical Genetics Institute	KAAH18	42	Female	NA	NA	NA	NA	NA
Discovery	Control	Medical Genetics Institute	KAAH19	42	Male	NA	NA	NA	NA	NA
Discovery	Control	Medical Genetics Institute	KAAH20	45	Male	NA	NA	NA	NA	NA
Discovery	Control	Medical Genetics Institute	KAAH22	51	Female	NA	NA	NA	NA	NA
Discovery	Control	Medical Genetics Institute	KAAH23	51	Male	NA	NA	NA	NA	NA
Discovery	Control	Medical Genetics Institute	KAAH24	57	Female	NA	NA	NA	NA	NA
Discovery	Control	Medical Genetics Institute	KAAH25	31	Female	NA	NA	NA	NA	NA
Discovery	Control	Medical Genetics Institute	KAAH26	55	Female	NA	NA	NA	NA	NA
Discovery	Control	Medical Genetics Institute	KAAH27	35	Female	NA	NA	NA	NA	NA
Discovery	Control	Medical Genetics Institute	KAAH30	40	Female	NA	NA	NA	NA	NA
Discovery	Control	Medical Genetics Institute	KAAH31	30	Male	NA	NA	NA	NA	NA
Discovery	Control	Medical Genetics Institute	KAAH32	45	Female	NA	NA	NA	NA	NA
Discovery	Control	Medical Genetics Institute	KAAH34	71	Male	NA	NA	NA	NA	NA
Discovery	Control	Medical Genetics Institute	KAAH36	40	Male	NA	NA	NA	NA	NA
Discovery	Control	Medical Genetics Institute	KAAH37	67	Female	NA	NA	NA	NA	NA
Discovery	Control	Medical Genetics Institute	KAAH38	42	Female	NA	NA	NA	NA	NA
Discovery	Control	Medical Genetics Institute	KAAH39	41	Male	NA	NA	NA	NA	NA
Discovery	Control	Medical Genetics Institute	KAAH41	22	Female	NA	NA	NA	NA	NA
Discovery	Control	Medical Genetics Institute	KAAH42	48	Female	NA	NA	NA	NA	NA
Discovery	Control	Medical Genetics Institute	KAAH43	49	Male	NA	NA	NA	NA	NA
Discovery	Control	Medical Genetics Institute	KAAH66	56	Female	NA	NA	NA	NA	NA
Discovery	Control	Medical Genetics Institute	KAAH67	64	Female	NA	NA	NA	NA	NA
Discovery	Control	Medical Genetics Institute	KAAH68	39	Male	NA	NA	NA	NA	NA
Discovery	Control	Medical Genetics Institute	KAAH69	42	Female	NA	NA	NA	NA	NA
Discovery	Control	Medical Genetics Institute	KAAH70	60	Male	NA	NA	NA	NA	NA
Discovery	Control	Medical Genetics Institute	KAAH71	35	Female	NA	NA	NA	NA	NA
Discovery	Control	Medical Genetics Institute	KAAH72	63	Female	NA	NA	NA	NA	NA
Discovery	Control	Medical Genetics Institute	KAAH74	45	Female	NA	NA	NA	NA	NA
Discovery	Control	Medical Genetics Institute	KAAH76	50	Female	NA	NA	NA	NA	NA
Discovery	Control	Medical Genetics Institute	KAAH77	38	Male	NA	NA	NA	NA	NA
Discovery	Control	Medical Genetics Institute	KAAI12	46	Male	NA	NA	NA	NA	NA
Discovery	Control	Medical Genetics Institute	KAAI14	33	Female	NA	NA	NA	NA	NA
Discovery	Control	Medical Genetics Institute	KAAI16	48	Male	NA	NA	NA	NA	NA
Discovery	Control	Medical Genetics Institute	KAAI22	67	Female	NA	NA	NA	NA	NA
Discovery	Control	Medical Genetics Institute	KAAI32	43	Male	NA	NA	NA	NA	NA
Discovery	Control	Medical Genetics Institute	KAAI33	49	Female	NA	NA	NA	NA	NA
Discovery	Control	Medical Genetics Institute	KAAI34	47	Female	NA	NA	NA	NA	NA
Discovery	Control	Medical Genetics Institute	KAAI35	52	Female	NA	NA	NA	NA	NA
Discovery	Control	Medical Genetics Institute	KAAI36	49	Female	NA	NA	NA	NA	NA
Discovery	Control	Medical Genetics Institute	KAAI37	52	Male	NA	NA	NA	NA	NA
Discovery	Control	Medical Genetics Institute	KAAI38	44	Male	NA	NA	NA	NA	NA
Discovery	Control	Medical Genetics Institute	KAAI39	53	Male	NA	NA	NA	NA	NA
Discovery	Control	Medical Genetics Institute	KAAI42	62	Male	NA	NA	NA	NA	NA
Discovery	Control	Medical Genetics Institute	KAAI43	59	Male	NA	NA	NA	NA	NA
Discovery	Control	Medical Genetics Institute	KAAI44	55	Female	NA	NA	NA	NA	NA
Discovery	Control	Medical Genetics Institute	KAAI79	52	Male	NA	NA	NA	NA	NA
Discovery	Control	Medical Genetics Institute	KAAI81	44	Male	NA	NA	NA	NA	NA
Discovery	Control	Medical Genetics Institute	KAAI86	35	Male	NA	NA	NA	NA	NA
Discovery	Control	Medical Genetics Institute	KAAI87	34	Female	NA	NA	NA	NA	NA
Discovery	Control	Medical Genetics Institute	KAAI94	51	Female	NA	NA	NA	NA	NA
Discovery	Control	Medical Genetics Institute	KAAI95	53	Female	NA	NA	NA	NA	NA
Discovery	Control	Medical Genetics Institute	KAAI97	51	Male	NA	NA	NA	NA	NA
Discovery	Control	Medical Genetics Institute	KAAJ35	54	Male	NA	NA	NA	NA	NA
Discovery	Control	Medical Genetics Institute	KAAJ37	20	Male	NA	NA	NA	NA	NA
Discovery	Control	Medical Genetics Institute	KAAJ38	53	Male	NA	NA	NA	NA	NA
Discovery	Control	Medical Genetics Institute	KAAJ39	50	Female	NA	NA	NA	NA	NA
Discovery	Control	Medical Genetics Institute	KAAJ40	49	Female	NA	NA	NA	NA	NA
Discovery	Control	Medical Genetics Institute	KAAJ41	40	Female	NA	NA	NA	NA	NA
Discovery	Control	Medical Genetics Institute	KAAJ44	34	Male	NA	NA	NA	NA	NA
Discovery	Control	Medical Genetics Institute	KAAJ94	46	Male	NA	NA	NA	NA	NA
Discovery	Control	Medical Genetics Institute	KAAK02	61	Female	NA	NA	NA	NA	NA
Discovery	Control	Medical Genetics Institute	KAAK21	40	Female	NA	NA	NA	NA	NA
Discovery	Control	Medical Genetics Institute	KAAK23	38	Male	NA	NA	NA	NA	NA
Discovery	Control	Medical Genetics Institute	KAAK29	37	Female	NA	NA	NA	NA	NA
Discovery	Control	Medical Genetics Institute	KAAK42	49	Male	NA	NA	NA	NA	NA
Discovery	Control	Medical Genetics Institute	KAAK54	48	Male	NA	NA	NA	NA	NA
Discovery	Control	Medical Genetics Institute	KAAL53	35	Male	NA	NA	NA	NA	NA
Discovery	Control	Medical Genetics Institute	KAAL57	49	Female	NA	NA	NA	NA	NA
Discovery	Control	Medical Genetics Institute	KAAL59	48	Male	NA	NA	NA	NA	NA
Discovery	Control	Medical Genetics Institute	KAAL62	53	Female	NA	NA	NA	NA	NA
Discovery	Control	Medical Genetics Institute	KAAL65	48	Male	NA	NA	NA	NA	NA
Discovery	Control	Medical Genetics Institute	KAAN36	58	Male	NA	NA	NA	NA	NA
Discovery	Control	Medical Genetics Institute	KAAN40	38	Female	NA	NA	NA	NA	NA
Discovery	Control	Medical Genetics Institute	KAAP12	47	Male	NA	NA	NA	NA	NA
Discovery	Control	Medical Genetics Institute	KAAU87	42	Female	NA	NA	NA	NA	NA
Discovery	Control	Medical Genetics Institute	KAAU88	41	Female	NA	NA	NA	NA	NA
Discovery	Control	Medical Genetics Institute	KAAU89	52	Male	NA	NA	NA	NA	NA
Discovery	Control	Medical Genetics Institute	KAAU92	59	Female	NA	NA	NA	NA	NA
Discovery	Control	Medical Genetics Institute	KAAU95	18	Female	NA	NA	NA	NA	NA
Discovery	Control	Medical Genetics Institute	KAAV01	54	Female	NA	NA	NA	NA	NA
Discovery	Control	Medical Genetics Institute	KAAV42	59	Female	NA	NA	NA	NA	NA
Discovery	Control	Medical Genetics Institute	KAAY06	47	Male	NA	NA	NA	NA	NA
Discovery	Control	Medical Genetics Institute	KAAY13	44	Female	NA	NA	NA	NA	NA
Discovery	Control	Medical Genetics Institute	KAAY63	44	Female	NA	NA	NA	NA	NA
Discovery	Control	Medical Genetics Institute	KABA07	61	Male	NA	NA	NA	NA	NA
Discovery	Control	Medical Genetics Institute	KABA24	58	Male	NA	NA	NA	NA	NA
Discovery	Control	Medical Genetics Institute	KABC43R2	41	Female	NA	NA	NA	NA	NA
Discovery	Control	Medical Genetics Institute	KABC48R1	43	Female	NA	NA	NA	NA	NA
Discovery	Control	Medical Genetics Institute	KABC89R1	31	Female	NA	NA	NA	NA	NA
Discovery	Control	Medical Genetics Institute	KABD19R1	47	Female	NA	NA	NA	NA	NA
Discovery	Control	Medical Genetics Institute	KABD50R1	45	Male	NA	NA	NA	NA	NA
Discovery	Control	Medical Genetics Institute	KABD80	49	Male	NA	NA	NA	NA	NA
Discovery	Control	Medical Genetics Institute	KABD94R1	68	Female	NA	NA	NA	NA	NA
Discovery	Control	Medical Genetics Institute	KABE59	39	Female	NA	NA	NA	NA	NA
Discovery	Control	Medical Genetics Institute	KABE65	66	Female	NA	NA	NA	NA	NA
Discovery	Control	Medical Genetics Institute	KABE67	72	Male	NA	NA	NA	NA	NA
Discovery	Control	Medical Genetics Institute	KABE68	61	Female	NA	NA	NA	NA	NA
Discovery	Control	Medical Genetics Institute	KABE72	32	Female	NA	NA	NA	NA	NA
Discovery	Control	Medical Genetics Institute	KABE79	45	Female	NA	NA	NA	NA	NA
Discovery	Control	Medical Genetics Institute	KABE87	58	Female	NA	NA	NA	NA	NA
Discovery	Control	Medical Genetics Institute	KABE88	55	Female	NA	NA	NA	NA	NA
Discovery	Control	Medical Genetics Institute	KABE91	43	Male	NA	NA	NA	NA	NA
Discovery	Control	Medical Genetics Institute	KABE92	36	Female	NA	NA	NA	NA	NA
Discovery	Control	Medical Genetics Institute	KABE98	60	Male	NA	NA	NA	NA	NA
Discovery	Control	Medical Genetics Institute	KABE99	48	Female	NA	NA	NA	NA	NA
Discovery	Control	Medical Genetics Institute	KABF01	30	Female	NA	NA	NA	NA	NA
Discovery	Control	Medical Genetics Institute	KABF02	40	Male	NA	NA	NA	NA	NA
Discovery	Control	Medical Genetics Institute	KABF07	31	Male	NA	NA	NA	NA	NA
Discovery	Control	Medical Genetics Institute	KABF10	48	Female	NA	NA	NA	NA	NA
Discovery	Control	Medical Genetics Institute	KABF11	52	Male	NA	NA	NA	NA	NA
Discovery	Control	Medical Genetics Institute	KABF12	38	Male	NA	NA	NA	NA	NA
Discovery	Control	Medical Genetics Institute	KABF15	45	Female	NA	NA	NA	NA	NA
Discovery	Control	Medical Genetics Institute	KABF18	54	Male	NA	NA	NA	NA	NA
Discovery	Control	Medical Genetics Institute	KABF19	52	Female	NA	NA	NA	NA	NA
Discovery	Control	Medical Genetics Institute	KABF21	51	Female	NA	NA	NA	NA	NA
Discovery	Control	Medical Genetics Institute	KABF24	34	Male	NA	NA	NA	NA	NA
Discovery	Control	Medical Genetics Institute	KABF25	44	Female	NA	NA	NA	NA	NA
Discovery	Control	Medical Genetics Institute	KABF26	45	Female	NA	NA	NA	NA	NA
Discovery	Control	Medical Genetics Institute	KABF27	45	Female	NA	NA	NA	NA	NA
Discovery	Control	Medical Genetics Institute	KABF29	30	Female	NA	NA	NA	NA	NA
Discovery	Control	Medical Genetics Institute	KABF30	32	Female	NA	NA	NA	NA	NA
Discovery	Control	Medical Genetics Institute	KABF34	37	Female	NA	NA	NA	NA	NA
Discovery	Control	Medical Genetics Institute	KABF39	47	Male	NA	NA	NA	NA	NA
Discovery	Control	Medical Genetics Institute	KABF42	43	Male	NA	NA	NA	NA	NA
Discovery	Control	Medical Genetics Institute	KABF43	36	Female	NA	NA	NA	NA	NA
Discovery	Control	Medical Genetics Institute	KABF44	37	Female	NA	NA	NA	NA	NA
Discovery	Control	Medical Genetics Institute	KABF52	34	Female	NA	NA	NA	NA	NA
Discovery	Control	Medical Genetics Institute	KABF62	59	Male	NA	NA	NA	NA	NA
Discovery	Control	Medical Genetics Institute	KABF63	49	Male	NA	NA	NA	NA	NA
Discovery	Control	Medical Genetics Institute	KABF64	42	Male	NA	NA	NA	NA	NA
Discovery	Control	Medical Genetics Institute	KABF65	48	Male	NA	NA	NA	NA	NA
Discovery	Control	Medical Genetics Institute	KABF66	54	Female	NA	NA	NA	NA	NA
Discovery	Control	Medical Genetics Institute	KABF67	55	Male	NA	NA	NA	NA	NA
Discovery	Control	Medical Genetics Institute	KABF68	55	Female	NA	NA	NA	NA	NA
Discovery	Control	Medical Genetics Institute	KABF69	53	Male	NA	NA	NA	NA	NA
Discovery	Control	Medical Genetics Institute	KABF70	46	Female	NA	NA	NA	NA	NA
Discovery	Control	Medical Genetics Institute	KABF73	30	Male	NA	NA	NA	NA	NA
Discovery	Control	Medical Genetics Institute	KABF74	30	Female	NA	NA	NA	NA	NA
Discovery	Control	Medical Genetics Institute	KABF75	52	Female	NA	NA	NA	NA	NA
Discovery	Control	Medical Genetics Institute	KABF76	52	Male	NA	NA	NA	NA	NA
Discovery	Control	Medical Genetics Institute	KABF77	21	Female	NA	NA	NA	NA	NA
Discovery	Control	Medical Genetics Institute	KABF78	28	Male	NA	NA	NA	NA	NA
Discovery	Control	Medical Genetics Institute	KABF79	45	Female	NA	NA	NA	NA	NA
Discovery	Control	Medical Genetics Institute	KABF80	47	Female	NA	NA	NA	NA	NA
Discovery	Control	Medical Genetics Institute	KABF81	36	Male	NA	NA	NA	NA	NA
Discovery	Control	Medical Genetics Institute	KABF82	46	Male	NA	NA	NA	NA	NA
Discovery	Control	Medical Genetics Institute	KABF83	42	Female	NA	NA	NA	NA	NA
Discovery	Control	Medical Genetics Institute	KABF84	41	Male	NA	NA	NA	NA	NA
Discovery	Control	Medical Genetics Institute	KABF85	66	Female	NA	NA	NA	NA	NA
Discovery	Control	Medical Genetics Institute	KABF86	50	Female	NA	NA	NA	NA	NA
Discovery	Control	Medical Genetics Institute	KABF87	71	Female	NA	NA	NA	NA	NA
Discovery	Control	Medical Genetics Institute	KABF88	46	Male	NA	NA	NA	NA	NA
Discovery	Control	Medical Genetics Institute	KABF89	70	Female	NA	NA	NA	NA	NA
Discovery	Control	Medical Genetics Institute	KABF90	51	Male	NA	NA	NA	NA	NA
Discovery	Control	Medical Genetics Institute	KABF91	49	Male	NA	NA	NA	NA	NA
Discovery	Control	Medical Genetics Institute	KABF92	49	Female	NA	NA	NA	NA	NA
Discovery	Control	Medical Genetics Institute	KABF93	65	Female	NA	NA	NA	NA	NA
Discovery	Control	Medical Genetics Institute	KABF94	32	Female	NA	NA	NA	NA	NA
Discovery	Control	Medical Genetics Institute	KABF95	46	Female	NA	NA	NA	NA	NA
Discovery	Control	Medical Genetics Institute	KABF96	52	Male	NA	NA	NA	NA	NA
Discovery	Control	Medical Genetics Institute	KABF97	51	Male	NA	NA	NA	NA	NA
Discovery	Control	Medical Genetics Institute	KABF98	38	Female	NA	NA	NA	NA	NA
Discovery	Control	Medical Genetics Institute	KABF99	29	Female	NA	NA	NA	NA	NA
Discovery	Control	Medical Genetics Institute	KABG01	38	Female	NA	NA	NA	NA	NA
Discovery	Control	Medical Genetics Institute	KABG02	42	Female	NA	NA	NA	NA	NA
Discovery	Control	Medical Genetics Institute	KABG03	46	Male	NA	NA	NA	NA	NA
Discovery	Control	Medical Genetics Institute	KABG05	35	Male	NA	NA	NA	NA	NA
Discovery	Control	Medical Genetics Institute	KABG06	48	Female	NA	NA	NA	NA	NA
Discovery	Control	Medical Genetics Institute	KABG07	57	Female	NA	NA	NA	NA	NA
Discovery	Control	Medical Genetics Institute	KABG08	53	Male	NA	NA	NA	NA	NA
Discovery	Control	Medical Genetics Institute	KABG09	56	Female	NA	NA	NA	NA	NA
Discovery	Control	Medical Genetics Institute	KABG10	58	Female	NA	NA	NA	NA	NA
Discovery	Control	Medical Genetics Institute	KABG11	58	Female	NA	NA	NA	NA	NA
Discovery	Control	Medical Genetics Institute	KABG12	62	Male	NA	NA	NA	NA	NA
Discovery	Control	Medical Genetics Institute	KABG13R1	31	Female	NA	NA	NA	NA	NA
Discovery	Control	Medical Genetics Institute	KABG14	37	Female	NA	NA	NA	NA	NA
Discovery	Control	Medical Genetics Institute	KABG15	53	Male	NA	NA	NA	NA	NA
Discovery	Control	Medical Genetics Institute	KABG16	19	Female	NA	NA	NA	NA	NA
Discovery	Control	Medical Genetics Institute	KABG17	57	Male	NA	NA	NA	NA	NA
Discovery	Control	Medical Genetics Institute	KABG19	55	Female	NA	NA	NA	NA	NA
Discovery	Control	Medical Genetics Institute	KABG20	58	Female	NA	NA	NA	NA	NA
Discovery	Control	Medical Genetics Institute	KABG21	39	Male	NA	NA	NA	NA	NA
Discovery	Control	Medical Genetics Institute	KABG23	54	Female	NA	NA	NA	NA	NA
Discovery	Control	Medical Genetics Institute	KABG24	31	Male	NA	NA	NA	NA	NA
Discovery	Control	Medical Genetics Institute	KABG25	54	Female	NA	NA	NA	NA	NA
Discovery	Control	Medical Genetics Institute	KABG26	47	Male	NA	NA	NA	NA	NA
Discovery	Control	Medical Genetics Institute	KABG27	52	Male	NA	NA	NA	NA	NA
Discovery	Control	Medical Genetics Institute	KABG28	46	Male	NA	NA	NA	NA	NA
Discovery	Control	Medical Genetics Institute	KABG29	45	Female	NA	NA	NA	NA	NA
Discovery	Control	Medical Genetics Institute	KABG30	41	Female	NA	NA	NA	NA	NA
Discovery	Control	Medical Genetics Institute	KABG31	56	Female	NA	NA	NA	NA	NA
Discovery	Control	Medical Genetics Institute	KABG32	44	Female	NA	NA	NA	NA	NA
Discovery	Control	Medical Genetics Institute	KABG33	76	Female	NA	NA	NA	NA	NA
Discovery	Control	Medical Genetics Institute	KABG34	54	Male	NA	NA	NA	NA	NA
Discovery	Control	Medical Genetics Institute	KABG35	50	Female	NA	NA	NA	NA	NA
Discovery	Control	Medical Genetics Institute	KABG36	58	Male	NA	NA	NA	NA	NA
Discovery	Control	Medical Genetics Institute	KABG37	45	Male	NA	NA	NA	NA	NA
Discovery	Control	Medical Genetics Institute	KABG38	42	Male	NA	NA	NA	NA	NA
Discovery	Control	Medical Genetics Institute	KABG39	45	Female	NA	NA	NA	NA	NA
Discovery	Control	Medical Genetics Institute	KABG40	53	Male	NA	NA	NA	NA	NA
Discovery	Control	Medical Genetics Institute	KABG42	43	Female	NA	NA	NA	NA	NA
Discovery	Control	Medical Genetics Institute	KABG43	48	Female	NA	NA	NA	NA	NA
Discovery	Control	Medical Genetics Institute	KABG44	49	Female	NA	NA	NA	NA	NA
Discovery	Control	Medical Genetics Institute	KABG45	51	Male	NA	NA	NA	NA	NA
Discovery	Control	Medical Genetics Institute	KABG46	53	Female	NA	NA	NA	NA	NA
Discovery	Control	Medical Genetics Institute	KABG47	54	Female	NA	NA	NA	NA	NA
Discovery	Control	Medical Genetics Institute	KABG48	70	Female	NA	NA	NA	NA	NA
Discovery	Control	Medical Genetics Institute	KABG49	41	Male	NA	NA	NA	NA	NA
Discovery	Control	Medical Genetics Institute	KABG51	49	Female	NA	NA	NA	NA	NA
Discovery	Control	Medical Genetics Institute	KABG52	41	Male	NA	NA	NA	NA	NA
Discovery	Control	Medical Genetics Institute	KABG53	54	Female	NA	NA	NA	NA	NA
Discovery	Control	Medical Genetics Institute	KABG56	38	Male	NA	NA	NA	NA	NA
Discovery	Control	Medical Genetics Institute	KABG61	37	Female	NA	NA	NA	NA	NA
Discovery	Control	Medical Genetics Institute	KABG62	52	Male	NA	NA	NA	NA	NA
Discovery	Control	Medical Genetics Institute	KABG63	52	Female	NA	NA	NA	NA	NA
Discovery	Control	Medical Genetics Institute	KABG64	19	Male	NA	NA	NA	NA	NA
Discovery	Control	Medical Genetics Institute	KABG65	49	Female	NA	NA	NA	NA	NA
Discovery	Control	Medical Genetics Institute	KABG66	57	Male	NA	NA	NA	NA	NA
Discovery	Control	Medical Genetics Institute	KABG67	52	Female	NA	NA	NA	NA	NA
Discovery	Control	Medical Genetics Institute	KABG68	43	Female	NA	NA	NA	NA	NA
Discovery	Control	Medical Genetics Institute	KABG71	44	Male	NA	NA	NA	NA	NA
Discovery	Control	Medical Genetics Institute	KABG72	45	Male	NA	NA	NA	NA	NA
Discovery	Control	Medical Genetics Institute	KABG73	53	Female	NA	NA	NA	NA	NA
Discovery	Control	Medical Genetics Institute	KABG74	43	Female	NA	NA	NA	NA	NA
Discovery	Control	Medical Genetics Institute	KABG75	57	Female	NA	NA	NA	NA	NA
Discovery	Control	Medical Genetics Institute	KABG76	49	Female	NA	NA	NA	NA	NA
Discovery	Control	Medical Genetics Institute	KABG77	49	Male	NA	NA	NA	NA	NA
Discovery	Control	Medical Genetics Institute	KABG78	38	Female	NA	NA	NA	NA	NA
Discovery	Control	Medical Genetics Institute	KABG79	54	Male	NA	NA	NA	NA	NA
Discovery	Control	Medical Genetics Institute	KABG80	31	Male	NA	NA	NA	NA	NA
Discovery	Control	Medical Genetics Institute	KABG81	59	Female	NA	NA	NA	NA	NA
Discovery	Control	Medical Genetics Institute	KABG82	62	Female	NA	NA	NA	NA	NA
Discovery	Control	Medical Genetics Institute	KABG83	34	Female	NA	NA	NA	NA	NA
Discovery	Control	Medical Genetics Institute	KABG84	48	Male	NA	NA	NA	NA	NA
Discovery	Control	Medical Genetics Institute	KABG86	60	Female	NA	NA	NA	NA	NA
Discovery	Control	Medical Genetics Institute	KABG88	31	Male	NA	NA	NA	NA	NA
Discovery	Control	Medical Genetics Institute	KABG89	30	Female	NA	NA	NA	NA	NA
Discovery	Control	Medical Genetics Institute	KABG91	33	Female	NA	NA	NA	NA	NA
Discovery	Control	Medical Genetics Institute	KABG92	40	Female	NA	NA	NA	NA	NA
Discovery	Control	Medical Genetics Institute	KABG93	34	Female	NA	NA	NA	NA	NA
Discovery	Control	Medical Genetics Institute	KABG95	27	Female	NA	NA	NA	NA	NA
Discovery	Control	Medical Genetics Institute	KABG96	36	Female	NA	NA	NA	NA	NA
Discovery	Control	Medical Genetics Institute	KABG97	36	Female	NA	NA	NA	NA	NA
Discovery	Control	Medical Genetics Institute	KABG98	37	Female	NA	NA	NA	NA	NA
Discovery	Control	Medical Genetics Institute	KABH01	29	Female	NA	NA	NA	NA	NA
Discovery	Control	Medical Genetics Institute	KABH02	37	Female	NA	NA	NA	NA	NA
Discovery	Control	Medical Genetics Institute	KABH03	31	Female	NA	NA	NA	NA	NA
Discovery	Control	Medical Genetics Institute	KABH04	37	Female	NA	NA	NA	NA	NA
Discovery	Control	Medical Genetics Institute	KABH05	24	Male	NA	NA	NA	NA	NA
Discovery	Control	Medical Genetics Institute	KABH06	36	Female	NA	NA	NA	NA	NA
Discovery	Control	Medical Genetics Institute	KABH07	27	Female	NA	NA	NA	NA	NA
Discovery	Control	Medical Genetics Institute	KABH08	35	Female	NA	NA	NA	NA	NA
Discovery	Control	Medical Genetics Institute	KABH09	34	Female	NA	NA	NA	NA	NA
Discovery	Control	Medical Genetics Institute	KABH10	35	Female	NA	NA	NA	NA	NA
Discovery	Control	Medical Genetics Institute	KABH11	28	Female	NA	NA	NA	NA	NA
Discovery	Control	Medical Genetics Institute	KABH12	25	Female	NA	NA	NA	NA	NA
Discovery	Control	Medical Genetics Institute	KABH13	34	Female	NA	NA	NA	NA	NA
Discovery	Control	Medical Genetics Institute	KABH14	31	Female	NA	NA	NA	NA	NA
Discovery	Control	Medical Genetics Institute	KABH15	33	Male	NA	NA	NA	NA	NA
Discovery	Control	Medical Genetics Institute	KABH16	46	Male	NA	NA	NA	NA	NA
Discovery	Control	Medical Genetics Institute	KABH17	36	Female	NA	NA	NA	NA	NA
Discovery	Control	Medical Genetics Institute	KABH18	39	Female	NA	NA	NA	NA	NA
Discovery	Control	Medical Genetics Institute	KABH19	25	Female	NA	NA	NA	NA	NA
Discovery	Control	Medical Genetics Institute	KABH20	36	Female	NA	NA	NA	NA	NA
Discovery	Control	Medical Genetics Institute	KABH21	30	Female	NA	NA	NA	NA	NA
Discovery	Control	Medical Genetics Institute	KABH22	34	Female	NA	NA	NA	NA	NA
Discovery	Control	Medical Genetics Institute	KABH23	30	Female	NA	NA	NA	NA	NA
Discovery	Control	Medical Genetics Institute	KABH24	31	Female	NA	NA	NA	NA	NA
Discovery	Control	Medical Genetics Institute	KABH25	60	Female	NA	NA	NA	NA	NA
Discovery	Control	Medical Genetics Institute	KABH26	37	Female	NA	NA	NA	NA	NA
Discovery	Control	Medical Genetics Institute	KABH27	40	Female	NA	NA	NA	NA	NA
Discovery	Control	Medical Genetics Institute	KABH28	41	Male	NA	NA	NA	NA	NA
Discovery	Control	Medical Genetics Institute	KABH29	64	Female	NA	NA	NA	NA	NA
Discovery	Control	Medical Genetics Institute	KABH30	35	Male	NA	NA	NA	NA	NA
Discovery	Control	Medical Genetics Institute	KABH31	35	Male	NA	NA	NA	NA	NA
Discovery	Control	Medical Genetics Institute	KABH33	83	Male	NA	NA	NA	NA	NA
Discovery	Control	Medical Genetics Institute	KABH34	32	Male	NA	NA	NA	NA	NA
Discovery	Control	Medical Genetics Institute	KABH35	44	Male	NA	NA	NA	NA	NA
Discovery	Control	Medical Genetics Institute	KABH36	49	Male	NA	NA	NA	NA	NA
Discovery	Control	Medical Genetics Institute	KABH37	58	Male	NA	NA	NA	NA	NA
Discovery	Control	Medical Genetics Institute	KABH40R1	50	Male	NA	NA	NA	NA	NA
Discovery	Control	Medical Genetics Institute	KABH43	64	Female	NA	NA	NA	NA	NA
Discovery	Control	Medical Genetics Institute	KABH45	41	Male	NA	NA	NA	NA	NA
Discovery	Control	Medical Genetics Institute	KABH46	57	Male	NA	NA	NA	NA	NA
Discovery	Control	Medical Genetics Institute	KABH52	42	Male	NA	NA	NA	NA	NA
Discovery	Control	Medical Genetics Institute	KABH53	40	Male	NA	NA	NA	NA	NA
Discovery	Control	Medical Genetics Institute	KABH55	83	Male	NA	NA	NA	NA	NA
Discovery	Control	Medical Genetics Institute	KABH56	45	Male	NA	NA	NA	NA	NA
Discovery	Control	Medical Genetics Institute	KABH58	68	Male	NA	NA	NA	NA	NA
Discovery	Control	Medical Genetics Institute	KABH96	65	Male	NA	NA	NA	NA	NA
Discovery	Control	Medical Genetics Institute	KABI01	64	Female	NA	NA	NA	NA	NA
Discovery	Control	Medical Genetics Institute	KABI02	66	Female	NA	NA	NA	NA	NA
Discovery	Control	Medical Genetics Institute	KABI08	68	Male	NA	NA	NA	NA	NA
Discovery	Control	Medical Genetics Institute	KABI27	65	Female	NA	NA	NA	NA	NA
Discovery	Control	Medical Genetics Institute	KABI47	67	Female	NA	NA	NA	NA	NA
Discovery	Control	Medical Genetics Institute	KABI66	67	Male	NA	NA	NA	NA	NA
Discovery	Control	Medical Genetics Institute	KABJ10	72	Female	NA	NA	NA	NA	NA
Discovery	Control	Medical Genetics Institute	KABJ30	67	Male	NA	NA	NA	NA	NA
Discovery	Control	Medical Genetics Institute	KHAA74	64	Female	NA	NA	NA	NA	NA
Discovery	Control	Medical Genetics Institute	KHAA75	48	Female	NA	NA	NA	NA	NA
Discovery	Control	Medical Genetics Institute	KHAA85	56	Male	NA	NA	NA	NA	NA
Discovery	Control	Medical Genetics Institute	KHAB53	67	Male	NA	NA	NA	NA	NA
Discovery	Control	Medical Genetics Institute	KHAB56	40	Female	NA	NA	NA	NA	NA
Discovery	Control	Medical Genetics Institute	KHAB58	59	Male	NA	NA	NA	NA	NA
Discovery	Control	Medical Genetics Institute	KHAC37R1	41	Female	NA	NA	NA	NA	NA
Discovery	Control	Medical Genetics Institute	KHAC44R2	38	Female	NA	NA	NA	NA	NA
Discovery	Control	Medical Genetics Institute	KHAC60	43	Female	NA	NA	NA	NA	NA
Discovery	Control	Medical Genetics Institute	KHAC67R1	62	Female	NA	NA	NA	NA	NA
Discovery	Control	Medical Genetics Institute	KHAC78	44	Male	NA	NA	NA	NA	NA
Discovery	Control	Medical Genetics Institute	KHAC84	34	Female	NA	NA	NA	NA	NA
Discovery	Control	Medical Genetics Institute	KHAC92	58	Male	NA	NA	NA	NA	NA
Discovery	Control	Medical Genetics Institute	KHAC93	33	Female	NA	NA	NA	NA	NA
Discovery	Control	Medical Genetics Institute	KHAD02	48	Female	NA	NA	NA	NA	NA
Discovery	Control	Medical Genetics Institute	KHAD03	30	Female	NA	NA	NA	NA	NA
Discovery	Control	Medical Genetics Institute	KHAD05R1	66	Male	NA	NA	NA	NA	NA
Discovery	Control	Medical Genetics Institute	KHAD06	31	Female	NA	NA	NA	NA	NA
Discovery	Control	Medical Genetics Institute	KHAD08	38	Female	NA	NA	NA	NA	NA
Discovery	Control	Medical Genetics Institute	KHAD09	43	Female	NA	NA	NA	NA	NA
Discovery	Control	Medical Genetics Institute	KHAD10	47	Male	NA	NA	NA	NA	NA
Discovery	Control	Medical Genetics Institute	KHAD11	34	Female	NA	NA	NA	NA	NA
Discovery	Control	Medical Genetics Institute	KHAD12	37	Male	NA	NA	NA	NA	NA
Discovery	Control	Medical Genetics Institute	KHAD13	45	Male	NA	NA	NA	NA	NA
Discovery	Control	Medical Genetics Institute	KHAD15	83	Male	NA	NA	NA	NA	NA
Discovery	Control	Medical Genetics Institute	KHAD17	33	Male	NA	NA	NA	NA	NA
Discovery	Control	Medical Genetics Institute	KHAD18	36	Male	NA	NA	NA	NA	NA
Discovery	Control	Medical Genetics Institute	KHAD20	41	Male	NA	NA	NA	NA	NA
Discovery	Control	Medical Genetics Institute	KZAA14	65	Male	NA	NA	NA	NA	NA
Discovery	Control	Medical Genetics Institute	KZAA15	59	Male	NA	NA	NA	NA	NA
Discovery	Control	Medical Genetics Institute	KZAA16	49	Female	NA	NA	NA	NA	NA
Discovery	Control	Medical Genetics Institute	KZAA17	44	Male	NA	NA	NA	NA	NA
Discovery	Control	Medical Genetics Institute	KZAA18	44	Male	NA	NA	NA	NA	NA
Discovery	Control	Medical Genetics Institute	KZAA19	52	Female	NA	NA	NA	NA	NA
Discovery	Control	Medical Genetics Institute	KZAA21	41	Female	NA	NA	NA	NA	NA
Discovery	Control	Medical Genetics Institute	KZAA24	34	Male	NA	NA	NA	NA	NA
Discovery	Control	Medical Genetics Institute	KZAA26	48	Female	NA	NA	NA	NA	NA
Discovery	Control	Medical Genetics Institute	KZAA28	43	Male	NA	NA	NA	NA	NA
Discovery	Control	Medical Genetics Institute	KZAA29	48	Male	NA	NA	NA	NA	NA
Discovery	Control	Medical Genetics Institute	KZAA30	31	Female	NA	NA	NA	NA	NA
Discovery	Control	Medical Genetics Institute	KZAA38	43	Female	NA	NA	NA	NA	NA
Discovery	Control	Medical Genetics Institute	KZAA39	43	Female	NA	NA	NA	NA	NA
Discovery	Control	Medical Genetics Institute	KZAA40	47	Male	NA	NA	NA	NA	NA
Discovery	Control	Medical Genetics Institute	KZAA41	39	Female	NA	NA	NA	NA	NA
Discovery	Control	Medical Genetics Institute	KZAA42	56	Female	NA	NA	NA	NA	NA
Discovery	Control	Medical Genetics Institute	KZAA44	47	Male	NA	NA	NA	NA	NA
Discovery	Control	Medical Genetics Institute	KZAA45	60	Female	NA	NA	NA	NA	NA
Discovery	Control	Medical Genetics Institute	KZAA46	59	Female	NA	NA	NA	NA	NA
Discovery	Control	Medical University of Hochiminh city	KZAA47	42	Female	NA	NA	NA	NA	NA
Discovery	Control	Medical University of Hochiminh city	KZAA50	58	Female	NA	NA	NA	NA	NA
Discovery	Control	Medical University of Hochiminh city	KZAA52	42	Male	NA	NA	NA	NA	NA
Discovery	Control	Medical University of Hochiminh city	KZAA72	31	Male	NA	NA	NA	NA	NA
Discovery	Control	Medical University of Hochiminh city	KZAA79	38	Female	NA	NA	NA	NA	NA
Discovery	Control	Medical University of Hochiminh city	KZAA80	64	Male	NA	NA	NA	NA	NA
Discovery	Control	Medical University of Hochiminh city	KZAA92	25	Female	NA	NA	NA	NA	NA
Discovery	Control	Medical University of Hochiminh city	KZAA95	42	Male	NA	NA	NA	NA	NA
Discovery	Control	Medical University of Hochiminh city	KZAA96	46	Male	NA	NA	NA	NA	NA
Discovery	Control	Medical University of Hochiminh city	KZAA98	50	Female	NA	NA	NA	NA	NA
Discovery	Control	Medical University of Hochiminh city	KZAA99	39	Female	NA	NA	NA	NA	NA
Discovery	Control	Medical Genetics Institute	KZAB01	31	Male	NA	NA	NA	NA	NA
Discovery	Control	Medical Genetics Institute	KZAB24	62	Female	NA	NA	NA	NA	NA
Discovery	Control	Medical Genetics Institute	KZAB33	65	Male	NA	NA	NA	NA	NA
Discovery	Control	Medical Genetics Institute	KZAC69	40	Female	NA	NA	NA	NA	NA
Discovery	Control	Medical Genetics Institute	KZAD64	57	Female	NA	NA	NA	NA	NA
Discovery	Control	Medical Genetics Institute	KZAD69	40	Female	NA	NA	NA	NA	NA
Discovery	Control	Medical Genetics Institute	KZAD87	41	Female	NA	NA	NA	NA	NA
Discovery	Control	Medical Genetics Institute	KZAE15	42	Female	NA	NA	NA	NA	NA
Discovery	Control	Medical Genetics Institute	KZAF78	47	Female	NA	NA	NA	NA	NA
Discovery	Control	Medical Genetics Institute	KZAF79	40	Male	NA	NA	NA	NA	NA
Discovery	Control	Medical Genetics Institute	KZAF82	43	Female	NA	NA	NA	NA	NA
Discovery	Control	Medical Genetics Institute	KZAH03	50	Female	NA	NA	NA	NA	NA
Discovery	Control	Medical Genetics Institute	KZAH04	48	Male	NA	NA	NA	NA	NA
Discovery	Control	Medical Genetics Institute	KZAH06	44	Male	NA	NA	NA	NA	NA
Discovery	Control	Medical Genetics Institute	KZAK42	47	Female	NA	NA	NA	NA	NA
Discovery	Control	Medical Genetics Institute	KZAK45	57	Male	NA	NA	NA	NA	NA
Discovery	Control	Medical Genetics Institute	KZAK56	51	Female	NA	NA	NA	NA	NA
Discovery	Control	Medical Genetics Institute	KZAK57	40	Male	NA	NA	NA	NA	NA
Discovery	Control	Medical Genetics Institute	KZAK59	69	Male	NA	NA	NA	NA	NA
Discovery	Control	Medical Genetics Institute	KZAK62	42	Male	NA	NA	NA	NA	NA
Discovery	Control	Medical Genetics Institute	KZAK65	44	Male	NA	NA	NA	NA	NA
Discovery	Control	Medical Genetics Institute	KZAK70	47	Female	NA	NA	NA	NA	NA
Discovery	Control	Medical Genetics Institute	KZAK75	46	Male	NA	NA	NA	NA	NA
Discovery	Control	Medical Genetics Institute	KZAM62	27	Male	NA	NA	NA	NA	NA
Discovery	Control	Medical Genetics Institute	KZAN30	34	Male	NA	NA	NA	NA	NA
Discovery	Control	Medical Genetics Institute	KZAN31	41	Female	NA	NA	NA	NA	NA
Discovery	Control	Medical Genetics Institute	KZAN53	33	Female	NA	NA	NA	NA	NA
Discovery	Control	Medical Genetics Institute	KZAN63	31	Male	NA	NA	NA	NA	NA
Discovery	Control	Medical Genetics Institute	KZAO55	54	Female	NA	NA	NA	NA	NA
Discovery	Control	Medical Genetics Institute	KZAP76	51	Female	NA	NA	NA	NA	NA
Discovery	Control	Medical Genetics Institute	KZAP91	32	Male	NA	NA	NA	NA	NA
Discovery	Control	Medical Genetics Institute	KZAQ38	26	Male	NA	NA	NA	NA	NA
Discovery	Control	Medical Genetics Institute	KZAT36R1	41	Female	NA	NA	NA	NA	NA
Discovery	Control	Medical Genetics Institute	KZAT50R1	43	Female	NA	NA	NA	NA	NA
Discovery	Control	Medical Genetics Institute	KZAT65R1	42	Male	NA	NA	NA	NA	NA
Discovery	Control	Medical Genetics Institute	KZAT69R1	57	Male	NA	NA	NA	NA	NA
Discovery	Control	Medical Genetics Institute	KZAT79R1	59	Male	NA	NA	NA	NA	NA
Discovery	Control	Medical Genetics Institute	KZAT82R1	40	Female	NA	NA	NA	NA	NA
Discovery	Control	Medical Genetics Institute	KZAT88R1	66	Male	NA	NA	NA	NA	NA
Discovery	Control	Medical Genetics Institute	KZAU31	58	Male	NA	NA	NA	NA	NA
Discovery	Control	Medical Genetics Institute	KZAU57	50	Male	NA	NA	NA	NA	NA
Discovery	Control	Medical Genetics Institute	KZAU65R1	47	Female	NA	NA	NA	NA	NA
Discovery	Control	Medical Genetics Institute	KZAV36R1	53	Male	NA	NA	NA	NA	NA
Discovery	Control	Medical Genetics Institute	KZAV48R1	47	Female	NA	NA	NA	NA	NA
Discovery	Control	Medical Genetics Institute	KZAV71R1	45	Female	NA	NA	NA	NA	NA
Discovery	Control	Medical Genetics Institute	KZAV97R1	48	Male	NA	NA	NA	NA	NA
Discovery	Control	Medical Genetics Institute	KZAW05R1	56	Male	NA	NA	NA	NA	NA
Discovery	Control	Medical Genetics Institute	KZAW22	47	Male	NA	NA	NA	NA	NA
Discovery	Control	Medical Genetics Institute	KZAW25	47	Male	NA	NA	NA	NA	NA
Discovery	Control	Medical Genetics Institute	KZAW32	43	Male	NA	NA	NA	NA	NA
Discovery	Control	Medical Genetics Institute	KZAW47R1	43	Male	NA	NA	NA	NA	NA
Discovery	Control	Medical Genetics Institute	KZAW59	40	Female	NA	NA	NA	NA	NA
Discovery	Control	Medical Genetics Institute	KZAW62	61	Female	NA	NA	NA	NA	NA
Discovery	Control	Medical Genetics Institute	KZAW65	58	Male	NA	NA	NA	NA	NA
Discovery	Control	Medical Genetics Institute	KZAW71	46	Male	NA	NA	NA	NA	NA
Discovery	Control	Medical Genetics Institute	KZAW73	40	Male	NA	NA	NA	NA	NA
Discovery	Control	Medical Genetics Institute	KZAW74R1	46	Male	NA	NA	NA	NA	NA
Discovery	Control	Medical Genetics Institute	KZAW75	40	Male	NA	NA	NA	NA	NA
Discovery	Control	Medical Genetics Institute	KZAW83R1	44	Male	NA	NA	NA	NA	NA
Discovery	Control	Medical Genetics Institute	KZAW89	52	Female	NA	NA	NA	NA	NA
Discovery	Control	Medical Genetics Institute	KZAX10	48	Female	NA	NA	NA	NA	NA
Discovery	Control	Medical Genetics Institute	KZAX11	47	Male	NA	NA	NA	NA	NA
Discovery	Control	Medical Genetics Institute	KZAX12	39	Female	NA	NA	NA	NA	NA
Discovery	Control	Medical Genetics Institute	KZAX13	65	Male	NA	NA	NA	NA	NA
Discovery	Control	Medical Genetics Institute	KZAX15	44	Female	NA	NA	NA	NA	NA
Discovery	Control	Medical Genetics Institute	KZAX16	62	Male	NA	NA	NA	NA	NA
Discovery	Control	Medical Genetics Institute	KZAX17	39	Male	NA	NA	NA	NA	NA
Discovery	Control	Medical Genetics Institute	KZAX21	40	Female	NA	NA	NA	NA	NA
Discovery	Control	Medical Genetics Institute	KZAX23	49	Male	NA	NA	NA	NA	NA
Discovery	Control	Medical Genetics Institute	KZAX24	42	Male	NA	NA	NA	NA	NA
Discovery	Control	Medical Genetics Institute	KZAX25	42	Female	NA	NA	NA	NA	NA
Discovery	Control	Medical Genetics Institute	KZAX26	40	Male	NA	NA	NA	NA	NA
Discovery	Control	Medical Genetics Institute	KZAX27	41	Female	NA	NA	NA	NA	NA
Discovery	Control	Medical Genetics Institute	KZAX28	54	Male	NA	NA	NA	NA	NA
Discovery	Control	Medical Genetics Institute	KZAX29	40	Female	NA	NA	NA	NA	NA
Discovery	Control	Medical Genetics Institute	KZAX30	40	Female	NA	NA	NA	NA	NA
Discovery	Control	Medical Genetics Institute	KZAX31	44	Male	NA	NA	NA	NA	NA
Discovery	Control	Medical Genetics Institute	KZAX32	52	Male	NA	NA	NA	NA	NA
Discovery	Control	Medical Genetics Institute	KZAX33	37	Female	NA	NA	NA	NA	NA
Discovery	Control	Medical Genetics Institute	KZAX38	33	Female	NA	NA	NA	NA	NA
Discovery	Control	Medical Genetics Institute	KZAX39	38	Female	NA	NA	NA	NA	NA
Discovery	Control	Medical Genetics Institute	KZAX43	37	Male	NA	NA	NA	NA	NA
Discovery	Control	Medical Genetics Institute	KZAX44	42	Female	NA	NA	NA	NA	NA
Discovery	Control	Medical Genetics Institute	KZAX45	44	Male	NA	NA	NA	NA	NA
Discovery	Control	Medical Genetics Institute	KZAX46	48	Male	NA	NA	NA	NA	NA
Discovery	Control	Medical Genetics Institute	KZAX49	48	Female	NA	NA	NA	NA	NA
Discovery	Control	Medical Genetics Institute	KZAX64	51	Female	NA	NA	NA	NA	NA
Discovery	Control	Medical Genetics Institute	KZAX65	45	Male	NA	NA	NA	NA	NA
Discovery	Control	Medical Genetics Institute	KZAX66	67	Female	NA	NA	NA	NA	NA
Discovery	Control	Medical Genetics Institute	KZAX70	32	Female	NA	NA	NA	NA	NA
Discovery	Control	Medical Genetics Institute	KZAX71	31	Female	NA	NA	NA	NA	NA
Discovery	Control	Medical Genetics Institute	KZAX72	23	Female	NA	NA	NA	NA	NA
Discovery	Control	Medical Genetics Institute	KZAX77	30	Male	NA	NA	NA	NA	NA
Discovery	Control	Medical Genetics Institute	KZAX78	31	Female	NA	NA	NA	NA	NA
Discovery	Control	Medical Genetics Institute	KZAX79	22	Female	NA	NA	NA	NA	NA
Discovery	Control	Medical Genetics Institute	KZAX80	38	Female	NA	NA	NA	NA	NA
Discovery	Control	Medical Genetics Institute	KZAX84	41	Female	NA	NA	NA	NA	NA
Discovery	Control	Medical Genetics Institute	KZAX87	31	Male	NA	NA	NA	NA	NA
Discovery	Control	Medical Genetics Institute	KZAX88	26	Female	NA	NA	NA	NA	NA
Discovery	Control	Medical Genetics Institute	KZAX94	32	Male	NA	NA	NA	NA	NA
Discovery	Control	Medical Genetics Institute	KZAX95	38	Female	NA	NA	NA	NA	NA
Discovery	Control	Medical Genetics Institute	KZAX96	36	Male	NA	NA	NA	NA	NA
Discovery	Control	Medical Genetics Institute	KZAX97	44	Male	NA	NA	NA	NA	NA
Discovery	Control	Medical Genetics Institute	KZAX98	46	Female	NA	NA	NA	NA	NA
Discovery	Control	Medical Genetics Institute	KZAX99	41	Female	NA	NA	NA	NA	NA
Discovery	Control	Medical Genetics Institute	KZAY01	41	Male	NA	NA	NA	NA	NA
Discovery	Control	Medical Genetics Institute	KZAY02	38	Female	NA	NA	NA	NA	NA
Discovery	Control	Medical Genetics Institute	KZAY03	53	Female	NA	NA	NA	NA	NA
Discovery	Control	Medical Genetics Institute	KZAY04	34	Male	NA	NA	NA	NA	NA
Discovery	Control	Medical Genetics Institute	KZAY06	36	Male	NA	NA	NA	NA	NA
Discovery	Control	Medical Genetics Institute	KZAY07	51	Male	NA	NA	NA	NA	NA
Discovery	Control	Medical Genetics Institute	KZAY08	45	Female	NA	NA	NA	NA	NA
Discovery	Control	Medical Genetics Institute	KZAY09	46	Male	NA	NA	NA	NA	NA
Discovery	Control	Medical Genetics Institute	KZAY10	31	Female	NA	NA	NA	NA	NA
Discovery	Control	Medical Genetics Institute	KZAY11	39	Male	NA	NA	NA	NA	NA
Discovery	Control	Medical Genetics Institute	KZAY12	36	Male	NA	NA	NA	NA	NA
Discovery	Control	Medical Genetics Institute	KZAY13	37	Female	NA	NA	NA	NA	NA
Discovery	Control	Medical Genetics Institute	KZAY14	37	Male	NA	NA	NA	NA	NA
Discovery	Control	Medical Genetics Institute	KZAY15	37	Female	NA	NA	NA	NA	NA
Discovery	Control	Medical Genetics Institute	KZAY16	30	Male	NA	NA	NA	NA	NA
Discovery	Control	Medical Genetics Institute	KZAY17	36	Female	NA	NA	NA	NA	NA
Discovery	Control	Medical Genetics Institute	KZAY18	35	Male	NA	NA	NA	NA	NA
Discovery	Control	Medical Genetics Institute	KZAY19	39	Male	NA	NA	NA	NA	NA
Discovery	Control	Medical Genetics Institute	KZAY20	45	Male	NA	NA	NA	NA	NA
Discovery	Control	Medical Genetics Institute	KZAY21	42	Male	NA	NA	NA	NA	NA
Discovery	Control	Medical Genetics Institute	KZAY22	42	Male	NA	NA	NA	NA	NA
Discovery	Control	Medical Genetics Institute	KZAY23	50	Male	NA	NA	NA	NA	NA
Discovery	Control	Medical Genetics Institute	KZAY24	41	Male	NA	NA	NA	NA	NA
Discovery	Control	Medical Genetics Institute	KZAY25	47	Male	NA	NA	NA	NA	NA
Discovery	Control	Medical Genetics Institute	KZAY26	41	Male	NA	NA	NA	NA	NA
Discovery	Control	Medical Genetics Institute	KZAY27	46	Male	NA	NA	NA	NA	NA
Discovery	Control	Medical Genetics Institute	KZAY28	40	Male	NA	NA	NA	NA	NA
Discovery	Control	Medical Genetics Institute	KZAY29	44	Male	NA	NA	NA	NA	NA
Discovery	Control	Medical Genetics Institute	KZAY33	46	Male	NA	NA	NA	NA	NA
Discovery	Control	Medical Genetics Institute	KZAY34	44	Male	NA	NA	NA	NA	NA
Discovery	Control	Medical Genetics Institute	KZAY35	47	Male	NA	NA	NA	NA	NA
Discovery	Control	Medical Genetics Institute	KZAY36	44	Male	NA	NA	NA	NA	NA
Discovery	Control	Medical Genetics Institute	KZAY37	47	Female	NA	NA	NA	NA	NA
Discovery	Control	Medical Genetics Institute	KZAY38	38	Male	NA	NA	NA	NA	NA
Discovery	Control	Medical Genetics Institute	KZAY39	51	Male	NA	NA	NA	NA	NA
Discovery	Control	Medical Genetics Institute	KZAY40	46	Male	NA	NA	NA	NA	NA
Discovery	Control	Medical Genetics Institute	KZAY41	32	Male	NA	NA	NA	NA	NA
Discovery	Control	Medical Genetics Institute	KZAY42	44	Male	NA	NA	NA	NA	NA
Discovery	Control	Medical Genetics Institute	KZAY44	50	Female	NA	NA	NA	NA	NA
Discovery	Control	Medical Genetics Institute	KZAY45	45	Female	NA	NA	NA	NA	NA
Discovery	Control	Medical Genetics Institute	KZAY47	48	Male	NA	NA	NA	NA	NA
Discovery	Control	Medical Genetics Institute	KZAY48	41	Female	NA	NA	NA	NA	NA
Discovery	Control	Medical Genetics Institute	KZAY49	44	Female	NA	NA	NA	NA	NA
Discovery	Control	Medical Genetics Institute	KZAY50	54	Male	NA	NA	NA	NA	NA
Discovery	Control	Medical Genetics Institute	KZAY52	46	Female	NA	NA	NA	NA	NA
Discovery	Control	Medical Genetics Institute	KZAY55	45	Female	NA	NA	NA	NA	NA
Discovery	Control	Medical Genetics Institute	KZAY56	40	Female	NA	NA	NA	NA	NA
Discovery	Control	Medical Genetics Institute	KZAY57	56	Female	NA	NA	NA	NA	NA
Discovery	Control	Medical Genetics Institute	KZAY58	59	Female	NA	NA	NA	NA	NA
Discovery	Control	Medical Genetics Institute	KZAY59	54	Female	NA	NA	NA	NA	NA
Discovery	Control	Medical Genetics Institute	KZAY60	62	Female	NA	NA	NA	NA	NA
Discovery	Control	Medical Genetics Institute	KZAY61	49	Male	NA	NA	NA	NA	NA
Discovery	Control	Medical Genetics Institute	KZAY62	46	Female	NA	NA	NA	NA	NA
Discovery	Control	Medical Genetics Institute	KZAY63	49	Female	NA	NA	NA	NA	NA
Discovery	Control	Medical Genetics Institute	KZAY64	40	Female	NA	NA	NA	NA	NA
Discovery	Control	Medical Genetics Institute	KZAY65	46	Female	NA	NA	NA	NA	NA
Discovery	Control	Medical Genetics Institute	KZAY66	40	Female	NA	NA	NA	NA	NA
Discovery	Control	Medical Genetics Institute	KZAY67	40	Male	NA	NA	NA	NA	NA
Discovery	Control	Medical Genetics Institute	KZAY68	64	Female	NA	NA	NA	NA	NA
Discovery	Control	Medical Genetics Institute	KZAY69	56	Female	NA	NA	NA	NA	NA
Discovery	Control	Medical Genetics Institute	KZAY70	58	Female	NA	NA	NA	NA	NA
Discovery	Control	Medical Genetics Institute	KZAY71	48	Male	NA	NA	NA	NA	NA
Discovery	Control	Medical Genetics Institute	KZAY72	76	Female	NA	NA	NA	NA	NA
Discovery	Control	Medical Genetics Institute	KZAY73	67	Female	NA	NA	NA	NA	NA
Discovery	Control	Medical Genetics Institute	KZAY74	64	Male	NA	NA	NA	NA	NA
Discovery	Control	Medical Genetics Institute	KZAY75	58	Female	NA	NA	NA	NA	NA
Discovery	Control	Medical Genetics Institute	KZAY76	60	Female	NA	NA	NA	NA	NA
Discovery	Control	Medical Genetics Institute	KZAY77	53	Female	NA	NA	NA	NA	NA
Discovery	Control	Medical Genetics Institute	KZAY78	54	Female	NA	NA	NA	NA	NA
Discovery	Control	Medical Genetics Institute	KZAY80	55	Male	NA	NA	NA	NA	NA
Discovery	Control	Medical Genetics Institute	KZAY81	54	Male	NA	NA	NA	NA	NA
Discovery	Control	Medical Genetics Institute	KZAY82	54	Female	NA	NA	NA	NA	NA
Discovery	Control	Medical Genetics Institute	KZAY83	44	Female	NA	NA	NA	NA	NA
Discovery	Control	Medical Genetics Institute	KZAY84	41	Female	NA	NA	NA	NA	NA
Discovery	Control	Medical Genetics Institute	KZAY85	42	Male	NA	NA	NA	NA	NA
Discovery	Control	Medical Genetics Institute	KZAY86	46	Male	NA	NA	NA	NA	NA
Discovery	Control	Medical Genetics Institute	KZAY87	40	Female	NA	NA	NA	NA	NA
Discovery	Control	Medical Genetics Institute	KZAY88	58	Female	NA	NA	NA	NA	NA
Discovery	Control	Medical Genetics Institute	KZAY89	50	Male	NA	NA	NA	NA	NA
Discovery	Control	Medical Genetics Institute	KZAY90	57	Female	NA	NA	NA	NA	NA
Discovery	Control	Medical Genetics Institute	KZAY91	40	Female	NA	NA	NA	NA	NA
Discovery	Control	Medical Genetics Institute	KZAY92	63	Female	NA	NA	NA	NA	NA
Discovery	Control	Medical Genetics Institute	KZAY93	64	Male	NA	NA	NA	NA	NA
Discovery	Control	Medical Genetics Institute	KZAY94	52	Female	NA	NA	NA	NA	NA
Discovery	Control	Medical Genetics Institute	KZAY95	62	Male	NA	NA	NA	NA	NA
Discovery	Control	Medical Genetics Institute	KZAY96	61	Female	NA	NA	NA	NA	NA
Discovery	Control	Medical Genetics Institute	KZAY99	42	Male	NA	NA	NA	NA	NA
Discovery	Control	Medical Genetics Institute	KZAZ01	43	Female	NA	NA	NA	NA	NA
Discovery	Control	Medical Genetics Institute	KZAZ02	43	Male	NA	NA	NA	NA	NA
Discovery	Control	Medical Genetics Institute	KZAZ03	59	Male	NA	NA	NA	NA	NA
Discovery	Control	Medical Genetics Institute	KZAZ04	59	Female	NA	NA	NA	NA	NA
Discovery	Control	Medical Genetics Institute	KZAZ05	64	Female	NA	NA	NA	NA	NA
Discovery	Control	Medical Genetics Institute	KZAZ06	62	Male	NA	NA	NA	NA	NA
Discovery	Control	Medical Genetics Institute	KZAZ07	54	Male	NA	NA	NA	NA	NA
Discovery	Control	Medical Genetics Institute	KZAZ08	60	Female	NA	NA	NA	NA	NA
Discovery	Control	Medical Genetics Institute	KZAZ09	53	Male	NA	NA	NA	NA	NA
Discovery	Control	Medical Genetics Institute	KZAZ10	55	Female	NA	NA	NA	NA	NA
Discovery	Control	Medical Genetics Institute	KZAZ11	51	Female	NA	NA	NA	NA	NA
Discovery	Control	Medical Genetics Institute	KZAZ12	66	Female	NA	NA	NA	NA	NA
Discovery	Control	Medical Genetics Institute	KZAZ16	52	Female	NA	NA	NA	NA	NA
Discovery	Control	Medical Genetics Institute	KZAZ18	66	Female	NA	NA	NA	NA	NA
Discovery	Control	Medical Genetics Institute	LBGS004R2	41	Female	NA	NA	NA	NA	NA
Discovery	Control	Medical Genetics Institute	LBGS015R1	50	Female	NA	NA	NA	NA	NA
Discovery	Control	Medical Genetics Institute	LBGS017R1	62	Female	NA	NA	NA	NA	NA
Discovery	Control	Medical Genetics Institute	LBGS086R2	63	Female	NA	NA	NA	NA	NA
Discovery	Control	Medical Genetics Institute	LBGS087R2	66	Male	NA	NA	NA	NA	NA
Discovery	Control	Medical Genetics Institute	LBGS091R2	62	Male	NA	NA	NA	NA	NA
Discovery	Control	Medical Genetics Institute	LBGS092R2	60	Female	NA	NA	NA	NA	NA
Discovery	Control	Medical Genetics Institute	LBGS105R2	56	Male	NA	NA	NA	NA	NA
Discovery	Breast cancer	Medic Medical Center	LBMB011	62	Female	II	Carcinoma	No	1	9x13mm
Discovery	Breast cancer	Medic Medical Center	LBMB043	56	Female	IB	Carcinoma	No	1	4x6mm
Discovery	Breast cancer	Medic Medical Center	LBMB198	63	Female	IIA	Carcinoma	No	1	25x20mm
Discovery	Breast cancer	Medic Medical Center	LBMB200	61	Female	IIA	Carcinoma	No	2	14x20mm and 12x24mm
Discovery	Breast cancer	Medic Medical Center	LBMB203	47	Female	NA	Carcinoma	No	1	44x22mm
Discovery	Breast cancer	Medic Medical Center	LBMB204	39	Female	IIA	Carcinoma	No	NA	NA
Discovery	Breast cancer	Medic Medical Center	LBMB205	38	Female	II	Carcinoma	No	NA	NA
Discovery	Breast cancer	Medic Medical Center	LBMB207	67	Female	II	Carcinoma	No	NA	NA
Discovery	Breast cancer	Medic Medical Center	LBMB210	48	Female	NA	Carcinoma	No	NA	NA
Discovery	Breast cancer	Medic Medical Center	LBMB211	57	Female	II	Carcinoma	No	NA	NA
Discovery	Breast cancer	Medic Medical Center	LBMB213	57	Female	II	Carcinoma	No	NA	NA
Discovery	Breast cancer	Medic Medical Center	LBMB215	53	Female	IIA	Carcinoma	No	NA	NA
Discovery	Breast cancer	Medic Medical Center	LBMB216	37	Female	NA	Carcinoma	No	NA	NA
Discovery	Breast cancer	Medic Medical Center	LBMB217	51	Female	II	Carcinoma	No	1	12x11mm
Discovery	Breast cancer	Medic Medical Center	LBMB218	59	Female	NA	Carcinoma	No	NA	NA
Discovery	Breast cancer	Medic Medical Center	LBMB221	65	Female	NA	Carcinoma	No	NA	NA
Discovery	Breast cancer	Medic Medical Center	LBMB222	44	Female	II	Carcinoma	No	NA	NA
Discovery	Breast cancer	Medic Medical Center	LBMB223	47	Female	II	Carcinoma	No	NA	NA
Discovery	Breast cancer	Medic Medical Center	LBMB225	58	Female	IIA	Carcinoma	No	NA	NA
Discovery	Breast cancer	Medic Medical Center	LBMB227	39	Female	NA	Carcinoma	No	NA	NA
Discovery	Breast cancer	Medic Medical Center	LBMB228	38	Female	IIIA	Carcinoma	No	NA	NA
Discovery	Breast cancer	Medic Medical Center	LBMB235	47	Female	IIA	Carcinoma	No	1	22x15mm
Discovery	Breast cancer	Medic Medical Center	LBMB236	47	Female	II	Carcinoma	No	1	13x14mm
Discovery	Breast cancer	Medic Medical Center	LBMB237	49	Female	II	Carcinoma	No	NA	NA
Discovery	Breast cancer	Medic Medical Center	LBMB238	38	Female	IA	Carcinoma	No	1	11x11mm
Discovery	Breast cancer	Medic Medical Center	LBMB239	58	Female	II	Carcinoma	No	1	17x14mm
Discovery	Breast cancer	Medic Medical Center	LBMB240	51	Female	II	Carcinoma	No	1	15x22mm
Discovery	Breast cancer	Medic Medical Center	LBMB241	67	Female	I	Carcinoma	No	NA	NA
Discovery	Breast cancer	Medic Medical Center	LBMB242	60	Female	I	Carcinoma	No	NA	NA
Discovery	Breast cancer	Medic Medical Center	LBMB244	67	Female	IIIA	Carcinoma	No	NA	NA
Discovery	Breast cancer	Medic Medical Center	LBMB246	48	Female	II	Carcinoma	No	1	2.6x4mm
Discovery	Breast cancer	Medic Medical Center	LBMB251	52	Female	NA	Carcinoma	No	NA	NA
Discovery	Breast cancer	Medic Medical Center	LBMB253	59	Female	IIA	Carcinoma	No	1	18x14mm
Discovery	Breast cancer	Medic Medical Center	LBMB254	44	Female	IIA	Carcinoma	No	1	14x10mm
Discovery	Breast cancer	Medic Medical Center	LBMB256	52	Female	NA	Carcinoma	No	NA	NA
Discovery	Breast cancer	Medic Medical Center	LBMB262	41	Female	I	Carcinoma	No	1	15x7mm
Discovery	Breast cancer	Medic Medical Center	LBMB263	36	Female	NA	Carcinoma	No	NA	NA
Discovery	Breast cancer	Medic Medical Center	LBMB264	45	Female	NA	Carcinoma	No	NA	NA
Discovery	Breast cancer	Medic Medical Center	LBMB268	45	Female	II	Carcinoma	No	1	12x17mm
Discovery	Breast cancer	Medic Medical Center	LBMB269	50	Female	I	Carcinoma	No	1	8x11mm
Discovery	Breast cancer	Medic Medical Center	MB003AR	57	Female	II	Carcinoma	No	1	62x30mm
Discovery	Breast cancer	Medic Medical Center	MB008	62	Female	I	Carcinoma	No	1	7.5mm
Discovery	Breast cancer	Medic Medical Center	MB009	63	Female	I	Carcinoma	No	1	20x26mm
Discovery	Breast cancer	Medic Medical Center	MB010AR	56	Female	IIIA	Carcinoma	No	1	300mm
Discovery	Breast cancer	Medic Medical Center	MB013	63	Female	II	Carcinoma	No	1	21x20mm
Discovery	Breast cancer	Medic Medical Center	MB016A	41	Female	IIIA	Carcinoma	No	1	21x27mm
Discovery	Breast cancer	Medic Medical Center	MB017	55	Female	II	Carcinoma	No	2	9mm, 14x21mm
Discovery	Breast cancer	Medic Medical Center	MB018R1	57	Female	II	Carcinoma	No	1	24x14mm
Discovery	Breast cancer	Medic Medical Center	MB021	47	Female	II	Carcinoma	No	1	36x17mm
Discovery	Breast cancer	Medic Medical Center	MB022	28	Female	II	Carcinoma	No	1	7x10cm
Discovery	Breast cancer	Medic Medical Center	MB023A	40	Female	II	Carcinoma	No	1	40x23mm
Discovery	Breast cancer	Medic Medical Center	MB024	58	Female	II	Carcinoma	No	1	17x14mm
Discovery	Breast cancer	Medic Medical Center	MB025	35	Female	II	Carcinoma	No	1	22x10mm
Discovery	Breast cancer	Medic Medical Center	MB026A	60	Female	IIIA	Carcinoma	No	1	12x28mm
Discovery	Breast cancer	Medic Medical Center	MB027AR	58	Female	II	Carcinoma	No	1	40mm
Discovery	Breast cancer	Medic Medical Center	MB028	64	Female	II	Carcinoma	No	1	11x23mm
Discovery	Breast cancer	Medic Medical Center	MB029A	32	Female	I	Carcinoma	No	1	16x8mm
Discovery	Breast cancer	Medic Medical Center	MB030A	48	Female	II	Carcinoma	No	1	12x21mm
Discovery	Breast cancer	Medic Medical Center	MB032A	39	Female	II	Carcinoma	No	1	28mm
Discovery	Breast cancer	Medic Medical Center	MB033	51	Female	II	Carcinoma	No	1	32x11mm
Discovery	Breast cancer	Medic Medical Center	MB034A	55	Female	II	Carcinoma	No	1	28x12mm
Discovery	Breast cancer	Medic Medical Center	MB035	48	Female	II	Carcinoma	No	2	50x29mm, 22x14mm
Discovery	Breast cancer	Medic Medical Center	MB037A	54	Female	II	Carcinoma	No	1	26x13mm
Discovery	Breast cancer	Medic Medical Center	MB038A	48	Female	II	Carcinoma	No	1	2.6x4mm
Discovery	Breast cancer	Medic Medical Center	MB039A	52	Female	I	Carcinoma	No	1	12x6mm
Discovery	Breast cancer	Medic Medical Center	MB040	50	Female	II	Carcinoma	No	1	22x17mm
Discovery	Breast cancer	Medic Medical Center	MB042A	69	Female	II	Carcinoma	No	1	20x22mm
Discovery	Breast cancer	Medic Medical Center	MB043	55	Female	II	Carcinoma	No	1	26x17mm
Discovery	Breast cancer	Medic Medical Center	MB045A	78	Female	I	Carcinoma	No	1	14x13mm
Discovery	Breast cancer	Medic Medical Center	MB046A	55	Female	I	Carcinoma	No	1	19x13.2mm
Discovery	Breast cancer	Medic Medical Center	MB047A	77	Female	II	Carcinoma	No	1	35x23mm
Discovery	Breast cancer	Medic Medical Center	MB048A	47	Female	II	Carcinoma	No	1	35x15mm
Discovery	Breast cancer	Medic Medical Center	MB049A	44	Female	II	Carcinoma	No	1	26x18x42mm
Discovery	Breast cancer	Medic Medical Center	MB050A	48	Female	II	Carcinoma	No	1	24x18mm
Discovery	Breast cancer	Medic Medical Center	MB051AR	60	Female	II	Carcinoma	No	1	23x13mm
Discovery	Breast cancer	Medic Medical Center	MB052	51	Female	IIIA	Carcinoma	No	2	42x25mm, 10x9mm
Discovery	Breast cancer	Medic Medical Center	MB053A	45	Female	II	Carcinoma	No	1	60x45mm
Discovery	Breast cancer	Medic Medical Center	MB055A	56	Female	I	Carcinoma	No	1	15x13mm
Discovery	Breast cancer	Medic Medical Center	MB056AR	37	Female	II	Carcinoma	No	1	24x34mm
Discovery	Breast cancer	Medic Medical Center	MB057A	57	Female	II	Carcinoma	No	1	18x15mm
Discovery	Breast cancer	Medic Medical Center	MB058A	66	Female	I	Carcinoma	No	1	5x9mm
Discovery	Breast cancer	Medic Medical Center	MB059AR	64	Female	IIIA	Carcinoma	No	2	30x20mm, 13mm
Discovery	Breast cancer	Medic Medical Center	MB063A	60	Female	IIIA	Carcinoma	No	1	25mm
Discovery	Breast cancer	Medic Medical Center	MB064A	59	Female	I	Carcinoma	No	1	12x14mm
Discovery	Breast cancer	Medic Medical Center	MB065	61	Female	II	Carcinoma	No	1	30x20mm
Discovery	Breast cancer	Medic Medical Center	MB066A	52	Female	I	Carcinoma	No	1	14x8mm
Discovery	Breast cancer	Medic Medical Center	MB067A	59	Female	II	Carcinoma	No	1	24x18mm
Discovery	Breast cancer	Medic Medical Center	MB068	38	Female	II	Carcinoma	No	1	35x22mm
Discovery	Breast cancer	Medic Medical Center	MB069A	57	Female	II	Carcinoma	No	1	24x23mm
Discovery	Breast cancer	Medic Medical Center	MB070	68	Female	II	Carcinoma	No	1	24x14mm
Discovery	Breast cancer	Medic Medical Center	MB071AR	66	Female	II	Carcinoma	No	1	10x20mm
Discovery	Breast cancer	Medic Medical Center	MB072A	68	Female	II	Carcinoma	No	1	24x18mm
Discovery	Breast cancer	Medic Medical Center	MB073	40	Female	II	Carcinoma	No	1	15x25mm
Discovery	Breast cancer	Medic Medical Center	MB074A	45	Female	I	Carcinoma	No	1	12x25mm
Discovery	Breast cancer	Medic Medical Center	MB076A	51	Female	II	Carcinoma	No	1	35mm
Discovery	Breast cancer	Medic Medical Center	MB078A	66	Female	II	Carcinoma	No	1	35mm
Discovery	Breast cancer	Medic Medical Center	MB079AR	44	Female	II	Carcinoma	No	1	23x19x22mm
Discovery	Breast cancer	Medic Medical Center	MB081AR	45	Female	I	Carcinoma	No	1	12x5mm
Discovery	Breast cancer	Medic Medical Center	MB082A	58	Female	IIIA	Carcinoma	No	1	26x16mm
Discovery	Breast cancer	Medic Medical Center	MB083AR	57	Female	IIIA	Carcinoma	No	1	40x30x30mm
Discovery	Breast cancer	Medic Medical Center	MB084AR	52	Female	II	Carcinoma	No	1	24x19mm
Discovery	Breast cancer	Medic Medical Center	MB085A	44	Female	I	Carcinoma	No	1	14x16mm
Discovery	Breast cancer	Medic Medical Center	MB086AR	61	Female	IIIA	Carcinoma	No	1	15x18mm
Discovery	Breast cancer	Medic Medical Center	MB087	63	Female	II	Carcinoma	No	1	28x18mm
Discovery	Breast cancer	Medic Medical Center	MB088AR	57	Female	IIIA	Carcinoma	No	1	25x15mm
Discovery	Breast cancer	Medic Medical Center	MB089A	63	Female	II	Carcinoma	No	1	20mm
Discovery	Breast cancer	Medic Medical Center	MB091	44	Female	II	Carcinoma	No	1	10x23mm
Discovery	Breast cancer	Medic Medical Center	MB092	60	Female	IIIA	Carcinoma	No	1	26mm
Discovery	Breast cancer	Medic Medical Center	MB093	41	Female	I	Carcinoma	No	1	15x15mm
Discovery	Breast cancer	Medic Medical Center	MB094	51	Female	I	Carcinoma	No	1	28x12mm
Discovery	Breast cancer	Medic Medical Center	MB095A	43	Female	IIIA	Carcinoma	No	2	40x36mm, 20x8mm
Discovery	Breast cancer	Medic Medical Center	MB096	80	Female	I	Carcinoma	No	2	7x10mm, 19x16mm
Discovery	Breast cancer	Medic Medical Center	MB097	31	Female	IIIA	Carcinoma	No	1	19x14mm
Discovery	Breast cancer	Medic Medical Center	MB098	56	Female	II	Carcinoma	No	1	20x12mm
Discovery	Breast cancer	Thu Duc City Hospital	MB101	55	Female	II	Carcinoma	No	1	22x24mm
Discovery	Breast cancer	Thu Duc City Hospital	MB102	62	Female	II	Carcinoma	No	1	22x21x20mm
Discovery	Breast cancer	Thu Duc City Hospital	MB106A	51	Female	NA	Carcinoma	No	1	4cm
Discovery	Breast cancer	Thu Duc City Hospital	MB107	41	Female	IA	Carcinoma	No	1	15x20mm
Discovery	Breast cancer	Thu Duc City Hospital	MB108A	61	Female	NA	Carcinoma	No	1	8cm
Discovery	Breast cancer	Thu Duc City Hospital	MB110	47	Female	IIIA	Carcinoma	No	1	13x29mm
Discovery	Breast cancer	Thu Duc City Hospital	MB115	43	Female	IIIA	Carcinoma	No	1	20x21mm
Discovery	Breast cancer	Thu Duc City Hospital	MB116	25	Female	IIA	Carcinoma	No	1	2cm
Discovery	Breast cancer	Thu Duc City Hospital	MB117	34	Female	IIA	Carcinoma	No	1	3cm
Discovery	Breast cancer	Thu Duc City Hospital	MB118	56	Female	II	Carcinoma	No	1	2cm
Discovery	Breast cancer	Medic Medical Center	NB023	37	Female	I	Carcinoma	No	1	16mm
Discovery	Breast cancer	Medic Medical Center	NB49	49	Female	I	Carcinoma	No	1	15x10mm
Discovery	Breast cancer	Medic Medical Center	NB024	52	Female	I	Carcinoma	No	1	15x10mm
Discovery	Breast cancer	Medic Medical Center	NB46	62	Female	I	Carcinoma	No	1	20x15mm
Discovery	Breast cancer	Medic Medical Center	NB045	64	Female	I	Carcinoma	No	1	5mm
Discovery	Breast cancer	Medic Medical Center	NB05R2	71	Female	I	Carcinoma	No	1	1cm
Discovery	Breast cancer	Medic Medical Center	NB028	41	Female	II	Carcinoma	No	1	13x22mm
Discovery	Breast cancer	Medic Medical Center	NB12R2	45	Female	II	Carcinoma	No	1	22x17mm
Discovery	Breast cancer	Medic Medical Center	NB033	47	Female	II	Carcinoma	No	1	25mm
Discovery	Breast cancer	Medic Medical Center	NB027	50	Female	II	Carcinoma	No	1	23x21mm
Discovery	Breast cancer	Medic Medical Center	NB034	50	Female	II	Carcinoma	No	1	27x15mm
Discovery	Breast cancer	Medic Medical Center	NB030	37	Female	IIIA	Carcinoma	No	1	20x30mm
Discovery	Breast cancer	Medic Medical Center	NB03R1	39	Female	IIIA	Carcinoma	No	1	36mm
Discovery	Breast cancer	Medic Medical Center	NB041	41	Female	IIIA	Carcinoma	No	1	24x10x13mm
Discovery	Breast cancer	Medic Medical Center	NB01R1	48	Female	IIIA	Carcinoma	No	1	7x5cm
Discovery	Breast cancer	Medic Medical Center	NB47	48	Female	IIIA	Carcinoma	No	1	53mm
Discovery	Breast cancer	Medic Medical Center	NB15	50	Female	IIIA	Carcinoma	No	1	10x6mm
Discovery	Breast cancer	Medic Medical Center	NB11	52	Female	IIIA	Carcinoma	No	1	25x18mm
Discovery	Breast cancer	Medic Medical Center	NB21	53	Female	IIIA	Carcinoma	No	1	28x8mm
Discovery	Breast cancer	Medic Medical Center	NB037	59	Female	IIIA	Carcinoma	No	1	22x25mm
Discovery	Breast cancer	Medic Medical Center	LBMB296	48	Female	NA	Carcinoma	No	NA	NA
Discovery	Breast cancer	Medic Medical Center	LBMB297	51	Female	NA	Carcinoma	No	NA	NA
Discovery	Breast cancer	Medic Medical Center	LBMB300	43	Female	II	Carcinoma	No	NA	NA
Discovery	Breast cancer	Medic Medical Center	LBMB303	39	Female	II	Carcinoma	No	NA	NA
Discovery	Breast cancer	Medic Medical Center	LBMB304	54	Female	II	Carcinoma	No	NA	NA
Discovery	Breast cancer	Medic Medical Center	LBMB305	46	Female	II	Carcinoma	No	NA	NA
Discovery	Breast cancer	Thu Duc City Hospital	MB138	52	Female	IIB	Carcinoma	No	1	2x3cm
Discovery	Breast cancer	Thu Duc City Hospital	MB139	43	Female	IIA	Carcinoma	No	1	3cm
Discovery	Breast cancer	Thu Duc City Hospital	MB146	37	Female	IIIA	Carcinoma	No	1	47x35x35mm
Discovery	Breast cancer	Thu Duc City Hospital	MB152	41	Female	IIA	Carcinoma	No	2	3cm
Discovery	Breast cancer	Thu Duc City Hospital	MB161R1	37	Female	I	Carcinoma	No	1	9x11mm
Discovery	Breast cancer	Thu Duc City Hospital	MB171	48	Female	I	Carcinoma	No	1	12x6mm
Discovery	CRC cancer	Medical University of Hochiminh city	CRCB14	58	Female	IIIA	Carcinoma	No	NA	9x8cm
Discovery	CRC cancer	Medical University of Hochiminh city	CRCB15	80	Female	II	Carcinoma	No	NA	4x3cm
Discovery	CRC cancer	Medical University of Hochiminh city	CRCB17	60	Male	IIIA	Carcinoma	No	NA	7x6cm
Discovery	CRC cancer	Medical University of Hochiminh city	CRCB27	86	Male	IIIA	Carcinoma	No	NA	4x3cm
Discovery	CRC cancer	Medical University of Hochiminh city	CRCB35	69	Male	I	Carcinoma	No	NA	NA
Discovery	CRC cancer	Medical University of Hochiminh city	CRCB36	53	Male	II	Carcinoma	No	NA	5x4cm
Discovery	CRC cancer	Medical University of Hochiminh city	CRCB38	46	Female	IIIA	Carcinoma	No	NA	2x1cm
Discovery	CRC cancer	Medical University of Hochiminh city	CRCB5	65	Male	NA	Carcinoma	No	NA	2cm
Discovery	CRC cancer	Medical University of Hochiminh city	CRCB54	67	Male	II	Carcinoma	No	NA	6x4.5cm
Discovery	CRC cancer	Medical University of Hochiminh city	CRCB55	49	Male	II	Carcinoma	No	NA	10x8cm
Discovery	CRC cancer	Medical University of Hochiminh city	CRCB59	81	Female	IIIA	Carcinoma	No	NA	3x3cm
Discovery	CRC cancer	Medical University of Hochiminh city	CRCB63	28	Female	IIIA	Carcinoma	No	NA	6.5x5cm
Discovery	CRC cancer	Medical Genetics Institute	L10677R1	58	Female	II	Carcinoma	No	NA	NA
Discovery	CRC cancer	Medical Genetics Institute	L10767	72	Male	IIIA	Carcinoma	No	NA	NA
Discovery	CRC cancer	Medical Genetics Institute	L11337	56	Male	IIIA	Carcinoma	No	NA	NA
Discovery	CRC cancer	Medical Genetics Institute	L11385	58	Male	NA	Carcinoma	No	NA	NA
Discovery	CRC cancer	Medical Genetics Institute	L11735	52	Female	NA	Carcinoma	No	NA	NA
Discovery	CRC cancer	Medical Genetics Institute	L11755	67	Male	NA	Carcinoma	No	NA	NA
Discovery	CRC cancer	Medical Genetics Institute	L11819	57	Male	NA	Carcinoma	No	NA	NA
Discovery	CRC cancer	Medical Genetics Institute	L12043	87	Male	NA	Carcinoma	No	NA	NA
Discovery	CRC cancer	Medical Genetics Institute	L12274	54	Male	IIIA	Carcinoma	No	NA	NA
Discovery	CRC cancer	Medical Genetics Institute	L12371	74	Female	NA	Carcinoma	No	NA	NA
Discovery	CRC cancer	Medical Genetics Institute	L12418	67	Female	IIIA	Carcinoma	No	NA	NA
Discovery	CRC cancer	Medical Genetics Institute	L12582	27	Male	IIIA	Carcinoma	No	NA	NA
Discovery	CRC cancer	Medical Genetics Institute	L12623	66	Female	IIIA	Carcinoma	No	NA	NA
Discovery	CRC cancer	Medical Genetics Institute	L12843	62	Female	IIIA	Carcinoma	No	NA	NA
Discovery	CRC cancer	Medical Genetics Institute	LAAC66	51	Female	II	Carcinoma	No	NA	NA
Discovery	CRC cancer	Medical Genetics Institute	LAAD77	79	Male	NA	Carcinoma	No	NA	NA
Discovery	CRC cancer	Medical Genetics Institute	LAAD88	67	Male	NA	Carcinoma	No	NA	NA
Discovery	CRC cancer	Medical University of Hochiminh city	LBC003	49	Female	II	Carcinoma	No	NA	1cm
Discovery	CRC cancer	Medical University of Hochiminh city	LBC007	64	Male	II	Carcinoma	No	NA	5x6cm
Discovery	CRC cancer	Medical University of Hochiminh city	LBC011	69	Male	II	Carcinoma	No	NA	NA
Discovery	CRC cancer	Medical University of Hochiminh city	LBC019	80	Female	I	Carcinoma	No	NA	NA
Discovery	CRC cancer	Medical University of Hochiminh city	LBC022	61	Male	II	Carcinoma	No	NA	2cm
Discovery	CRC cancer	Medical University of Hochiminh city	LBC027	30	Male	II	Carcinoma	No	NA	6x5cm
Discovery	CRC cancer	Medical University of Hochiminh city	LBC030	72	Male	I	Carcinoma	No	NA	2x4cm
Discovery	CRC cancer	Medical University of Hochiminh city	LBC038	54	Male	II	Carcinoma	No	NA	8x6cm
Discovery	CRC cancer	Medical University of Hochiminh city	LBC059	68	Female	II	Carcinoma	No	NA	NA
Discovery	CRC cancer	Medical University of Hochiminh city	LBC063	64	Male	II	Carcinoma	No	NA	NA
Discovery	CRC cancer	Medical University of Hochiminh city	LBC064	86	Female	II	Carcinoma	No	NA	NA
Discovery	CRC cancer	Medical University of Hochiminh city	LBC069	63	Female	II	Carcinoma	No	NA	NA
Discovery	CRC cancer	Medical University of Hochiminh city	LBC071	36	Female	II	Carcinoma	No	NA	NA
Discovery	CRC cancer	Medical University of Hochiminh city	LBC084	62	Male	IIB	Carcinoma	No	NA	NA
Discovery	CRC cancer	Medical University of Hochiminh city	LBC085	86	Male	IIIA	Carcinoma	No	NA	NA
Discovery	CRC cancer	Medical University of Hochiminh city	LBC094	51	Female	IIIA	Carcinoma	No	NA	NA
Discovery	CRC cancer	Medical University of Hochiminh city	MC001	48	Male	IIb	Carcinoma	No	1	10x10
Discovery	CRC cancer	Medical University of Hochiminh city	MC004	68	Male	IIIA	Carcinoma	No	1	3x3
Discovery	CRC cancer	Medical University of Hochiminh city	MC005	32	Female	IIa	Carcinoma	No	1	5x6
Discovery	CRC cancer	Medical University of Hochiminh city	MC006	65	Male	IIA	Carcinoma	No	1	4x4
Discovery	CRC cancer	Medical University of Hochiminh city	MC007	67	Male	I	Carcinoma	No	1	1x1.5
Discovery	CRC cancer	Medical University of Hochiminh city	MC010	76	Female	IIA	Carcinoma	No	1	5x5
Discovery	CRC cancer	Medical University of Hochiminh city	MC012	63	Female	IIIA	Carcinoma	No	1	4x4
Discovery	CRC cancer	Medical University of Hochiminh city	MC014	66	Male	I	Carcinoma	No	1	4x4
Discovery	CRC cancer	Medical University of Hochiminh city	MC017	37	Male	IIB	Carcinoma	No	1	4x6
Discovery	CRC cancer	Medical University of Hochiminh city	MC018A	47	Male	IIIA	Carcinoma	No	1	4x4
Discovery	CRC cancer	Medical University of Hochiminh city	MC019A	37	Male	I	Carcinoma	No	1	15x15
Discovery	CRC cancer	Medical University of Hochiminh city	MC021A	69	Male	IIIA	Carcinoma	No	1	4x5
Discovery	CRC cancer	Medical University of Hochiminh city	MC023A	34	Male	IIIA	Carcinoma	No	1	4x4
Discovery	CRC cancer	Medical University of Hochiminh city	MC025A	85	Female	IIIA	Carcinoma	No	1	4x4
Discovery	CRC cancer	Medical University of Hochiminh city	MC026A	71	Male	IIa	Carcinoma	No	1	4x5
Discovery	CRC cancer	Medical University of Hochiminh city	MC027A	56	Female	IIIA	Carcinoma	No	1	5x6
Discovery	CRC cancer	Medical University of Hochiminh city	MC028A	66	Male	IIIA	Carcinoma	No	1	4x3
Discovery	CRC cancer	Medical University of Hochiminh city	MC030A	71	Male	IIIA	Carcinoma	No	1	3x3
Discovery	CRC cancer	Medical University of Hochiminh city	MC031A	42	Male	IIB	Carcinoma	No	1	6x6
Discovery	CRC cancer	Medical University of Hochiminh city	MC034A	63	Male	IIB	Carcinoma	No	1	4x4
Discovery	CRC cancer	Medical University of Hochiminh city	MC035A	66	Male	IIIA	Carcinoma	No	1	2x2
Discovery	CRC cancer	Medical University of Hochiminh city	MC036A	50	Female	IIIA	Carcinoma	No	1	5x3.5
Discovery	CRC cancer	Medical University of Hochiminh city	MC039A	58	Male	IIIA	Carcinoma	No	1	5x5
Discovery	CRC cancer	Medical University of Hochiminh city	MC041A	55	Male	I	Carcinoma	No	1	2x2cm
Discovery	CRC cancer	Medical University of Hochiminh city	MC042A	67	Male	IIIA	Carcinoma	No	1	4x2
Discovery	CRC cancer	Medical University of Hochiminh city	MC043A	45	Male	IIIA	Carcinoma	No	1	3x4
Discovery	CRC cancer	Medical University of Hochiminh city	MC044A	51	Male	IIA	Carcinoma	No	1	4x5
Discovery	CRC cancer	Medical University of Hochiminh city	MC045A	78	Female	I	Carcinoma	No	1	2x2
Discovery	CRC cancer	Medical University of Hochiminh city	MC046A	43	Male	IIIA	Carcinoma	No	1	3.5x3
Discovery	CRC cancer	Medical University of Hochiminh city	MC047A	71	Male	IIA	Carcinoma	No	1	4x5
Discovery	CRC cancer	Medical University of Hochiminh city	MC049A	67	Female	IIIA	Carcinoma	No	1	4x6
Discovery	CRC cancer	Medical University of Hochiminh city	MC050A	65	Male	IIIA	Carcinoma	No	1	5x5
Discovery	CRC cancer	Medical University of Hochiminh city	MC051A	65	Female	IIa	Carcinoma	No	1	5x4
Discovery	CRC cancer	Medical University of Hochiminh city	MC052A	53	Female	IIa	Carcinoma	No	1	4x4
Discovery	CRC cancer	Medical University of Hochiminh city	MC054A	70	Male	IIb	Carcinoma	No	1	3x3.5
Discovery	CRC cancer	Medical University of Hochiminh city	MC057A	41	Male	IIIA	Carcinoma	No	1	4x2.5
Discovery	CRC cancer	Medical University of Hochiminh city	MC058A	62	Male	IIIA	Carcinoma	No	1	5x3
Discovery	CRC cancer	Medical University of Hochiminh city	MC059A	73	Female	IIb	Carcinoma	No	1	7x5
Discovery	CRC cancer	Medical University of Hochiminh city	MC061A	54	Male	IIa	Carcinoma	No	1	5x5
Discovery	CRC cancer	Medical University of Hochiminh city	MC063A	67	Male	IIb	Carcinoma	No	1	4x3
Discovery	CRC cancer	Medical University of Hochiminh city	MC066A	41	Female	IIA	Carcinoma	No	1	4x4
Discovery	CRC cancer	Medical University of Hochiminh city	MC070A	66	Female	IIIA	Carcinoma	No	1	4x4
Discovery	CRC cancer	Medical University of Hochiminh city	MC073	42	Female	IIIA	Carcinoma	No	1	6x6
Discovery	CRC cancer	Medical University of Hochiminh city	MC074	50	Female	I	Carcinoma	No	1	2.5x1
Discovery	CRC cancer	Medical University of Hochiminh city	MC078A	30	Male	IIIA	Carcinoma	No	NA	NA
Discovery	CRC cancer	Medical University of Hochiminh city	MC080	47	Male	NA	Carcinoma	No	NA	NA
Discovery	CRC cancer	Medical University of Hochiminh city	MC082A	66	Male	NA	Carcinoma	No	NA	NA
Discovery	CRC cancer	Medical University of Hochiminh city	MC084A	52	Male	NA	Carcinoma	No	NA	NA
Discovery	CRC cancer	Thu Duc City Hospital	MC101	67	Male	I	Carcinoma	No	1	42mm
Discovery	CRC cancer	Thu Duc City Hospital	MC103	72	Female	NA	Carcinoma	No	NA	NA
Discovery	CRC cancer	Thu Duc City Hospital	MC107A	61	Female	I	Carcinoma	No	1	40mm
Discovery	CRC cancer	Thu Duc City Hospital	MC110A	73	Female	IIIA	Carcinoma	No	1	52mm
Discovery	CRC cancer	Thu Duc City Hospital	MC112A	39	Female	IIA	Carcinoma	No	1	60mm
Discovery	CRC cancer	Thu Duc City Hospital	MC115A	77	Male	IIB	Carcinoma	No	1	90 x 61 mm
Discovery	CRC cancer	Thu Duc City Hospital	MC117A	60	Male	IIA	Carcinoma	No	2	73x35mm
Discovery	CRC cancer	Thu Duc City Hospital	MC120A	30	Female	IIIA	Carcinoma	No	1	80mm
Discovery	CRC cancer	Medical University of Hochiminh city	YCAA04	61	Female	II	NA	No	NA	NA
Discovery	CRC cancer	Medical Genetics Institute	YCAA10	65	Male	IIIA	NA	No	NA	NA
Discovery	CRC cancer	Medical Genetics Institute	YCAA34	93	Male	IIIA	NA	No	NA	NA
Discovery	CRC cancer	Medical Genetics Institute	YCAA92	57	Female	II	NA	No	NA	NA
Discovery	CRC cancer	Medical Genetics Institute	YCAB45	55	Female	II	NA	No	NA	NA
Discovery	Gastric cancer	Medical University of Hochiminh city	LBG10	54	Male	II	Carcinoma	No	NA	NA
Discovery	Gastric cancer	Medical University of Hochiminh city	LBG11	54	Male	II	Carcinoma	No	NA	NA
Discovery	Gastric cancer	Medical University of Hochiminh city	LBG001	97	Male	II	Carcinoma	No	NA	NA
Discovery	Gastric cancer	Medical University of Hochiminh city	LBG006	NA	Male	NA	Carcinoma	No	NA	NA
Discovery	Gastric cancer	Medical University of Hochiminh city	LBG19	45	Female	I	Carcinoma	No	NA	NA
Discovery	Gastric cancer	Medical University of Hochiminh city	LBG15	71	Female	II	Carcinoma	No	NA	NA
Discovery	Gastric cancer	Medical University of Hochiminh city	LBG18	67	Male	NA	Carcinoma	No	NA	NA
Discovery	Gastric cancer	Medical University of Hochiminh city	LBG16R1	55	Female	NA	Carcinoma	No	NA	NA
Discovery	Gastric cancer	Medical University of Hochiminh city	LBG20	61	Female	NA	Carcinoma	No	NA	NA
Discovery	Gastric cancer	Medical University of Hochiminh city	LBG22	40	Male	NA	Carcinoma	No	NA	NA
Discovery	Gastric cancer	Medical University of Hochiminh city	MG077A	63	Male	I	NA	No	NA	NA
Discovery	Gastric cancer	Medical University of Hochiminh city	MG035A	46	Male	IIA	NA	No	NA	NA
Discovery	Gastric cancer	Medical University of Hochiminh city	MG042A	50	Male	IIB	NA	No	NA	3.5
Discovery	Gastric cancer	Medical University of Hochiminh city	MG039A	50	Female	IIIA	NA	No	NA	8
Discovery	Gastric cancer	Medical University of Hochiminh city	MG004A	57	Male	IIB	NA	No	NA	NA
Discovery	Gastric cancer	Medical University of Hochiminh city	MG012A	70	Male	IIA	NA	No	NA	3
Discovery	Gastric cancer	Medical University of Hochiminh city	MG085A	38	Female	NA	NA	No	NA	NA
Discovery	Gastric cancer	Medical University of Hochiminh city	MG048A	75	Male	IIB	NA	No	NA	4
Discovery	Gastric cancer	Medical University of Hochiminh city	MG023A	37	Female	IIB	NA	No	NA	NA
Discovery	Gastric cancer	Medical University of Hochiminh city	MG058A	46	Male	IIIA	NA	No	NA	8
Discovery	Gastric cancer	Medical University of Hochiminh city	MG059A	56	Female	IIIA	NA	No	NA	6.5
Discovery	Gastric cancer	Medical University of Hochiminh city	MG036A	50	Male	IIIA	NA	No	NA	NA
Discovery	Gastric cancer	Medical University of Hochiminh city	MG029A	59	Female	IIA	NA	No	NA	1.5
Discovery	Gastric cancer	Medical University of Hochiminh city	MG033A	51	Male	IIIA	NA	No	NA	NA
Discovery	Gastric cancer	Medical University of Hochiminh city	MG055A	54	Male	IIIA	NA	No	NA	6.5
Discovery	Gastric cancer	Medical University of Hochiminh city	MG022A	59	Male	IIIA	NA	No	NA	NA
Discovery	Gastric cancer	Medical University of Hochiminh city	MG019A	59	Male	IIIA	NA	No	NA	NA
Discovery	Gastric cancer	Medical University of Hochiminh city	MG050A	63	Female	IIIA	NA	No	NA	5
Discovery	Gastric cancer	Medical University of Hochiminh city	MG041A	62	Male	IIIA	NA	No	NA	5
Discovery	Gastric cancer	Medical University of Hochiminh city	MG067A	62	Male	IIIA	NA	No	NA	3
Discovery	Gastric cancer	Medical University of Hochiminh city	MG057A	65	Male	IIIA	NA	No	NA	4
Discovery	Gastric cancer	Medical University of Hochiminh city	MG008A	65	Male	IIIA	NA	No	NA	6
Discovery	Gastric cancer	Medical University of Hochiminh city	MG090R2	44	Female	NA	NA	No	NA	NA
Discovery	Gastric cancer	Medical University of Hochiminh city	MG040A	67	Female	IIIA	NA	No	NA	NA
Discovery	Gastric cancer	Medical University of Hochiminh city	MG051A	65	Female	IIA	NA	No	NA	4
Discovery	Gastric cancer	Medical University of Hochiminh city	MG052A	36	Female	IA	NA	No	NA	4
Discovery	Gastric cancer	Medical University of Hochiminh city	MG028A	67	Male	IIIA	NA	No	NA	NA
Discovery	Gastric cancer	Medical University of Hochiminh city	MG060A	67	Male	IIIA	NA	No	NA	5
Discovery	Gastric cancer	Medical University of Hochiminh city	MG037A	68	Male	IIIA	NA	No	NA	6
Discovery	Gastric cancer	Medical University of Hochiminh city	MG014A	71	Male	IIIA	NA	No	NA	4
Discovery	Gastric cancer	Medical University of Hochiminh city	MG062A	67	Female	IIIA	NA	No	NA	3
Discovery	Gastric cancer	Medical University of Hochiminh city	MG053A	72	Male	IIIA	NA	No	NA	NA
Discovery	Gastric cancer	Medical University of Hochiminh city	MG063A	80	Female	IB	NA	No	NA	4
Discovery	Gastric cancer	Medical University of Hochiminh city	MG005A	79	Male	IIIA	NA	No	NA	4
Discovery	Gastric cancer	Medical University of Hochiminh city	MG009A	84	Male	IIIA	NA	No	NA	NA
Discovery	Gastric cancer	Medical University of Hochiminh city	MG026A	86	Female	IIIA	NA	No	NA	3
Discovery	Gastric cancer	Medical University of Hochiminh city	MG086R2	48	Male	NA	NA	No	NA	NA
Discovery	Gastric cancer	Medical University of Hochiminh city	MG030A	51	Female	NA	NA	No	NA	NA
Discovery	Gastric cancer	Medical University of Hochiminh city	MG118	51	Male	NA	NA	No	NA	NA
Discovery	Gastric cancer	Medical University of Hochiminh city	MG080A	61	Male	NA	NA	No	NA	NA
Discovery	Gastric cancer	Medical University of Hochiminh city	MG087R1	61	Male	NA	NA	No	NA	NA
Discovery	Gastric cancer	Medical University of Hochiminh city	MG113A	55	Female	NA	NA	No	NA	NA
Discovery	Gastric cancer	Medical University of Hochiminh city	MG083A	56	Female	NA	NA	No	NA	NA
Discovery	Gastric cancer	Medical University of Hochiminh city	MG049A	57	Female	NA	NA	No	NA	NA
Discovery	Gastric cancer	Medical University of Hochiminh city	MG120	65	Male	NA	NA	No	NA	NA
Discovery	Gastric cancer	Medical University of Hochiminh city	MG078A	66	Male	NA	NA	No	NA	NA
Discovery	Gastric cancer	Medical University of Hochiminh city	MG073A	67	Male	NA	NA	No	NA	NA
Discovery	Gastric cancer	Medical University of Hochiminh city	MG099	61	Female	NA	NA	No	NA	NA
Discovery	Gastric cancer	Medical University of Hochiminh city	MG112A	64	Female	NA	NA	No	NA	NA
Discovery	Gastric cancer	Medical University of Hochiminh city	MG076A	67	Male	NA	NA	No	NA	NA
Discovery	Gastric cancer	Medical University of Hochiminh city	MG122	70	Female	NA	NA	No	NA	NA
Discovery	Gastric cancer	Medical University of Hochiminh city	MG093	70	Male	NA	NA	No	NA	NA
Discovery	Gastric cancer	Medical University of Hochiminh city	MG025A	73	Male	NA	NA	No	NA	NA
Discovery	Gastric cancer	Medical University of Hochiminh city	MG100	73	Male	NA	NA	No	NA	NA
Discovery	Gastric cancer	Medical University of Hochiminh city	MG074A	80	Male	NA	NA	No	NA	NA
Discovery	Gastric cancer	Medical University of Hochiminh city	MG075A	73	Female	NA	NA	No	NA	NA
Discovery	Gastric cancer	Medical University of Hochiminh city	MG020A	84	Female	NA	NA	No	NA	NA
Discovery	Liver cancer	Medical Genetics Institute	LBH002	86	Male	I	Carcinoma	No	NA	4.3
Discovery	Liver cancer	Medical Genetics Institute	LBH004	35	Male	I	HCC	No	NA	3.5
Discovery	Liver cancer	Medical Genetics Institute	LBH005	56	Male	NA	HCC	No	NA	NA
Discovery	Liver cancer	Medical Genetics Institute	LBH006	50	Male	II	HCC	No	NA	3.7
Discovery	Liver cancer	Medical Genetics Institute	LBH007	57	Female	NA	HCC	No	NA	10.1
Discovery	Liver cancer	Medical Genetics Institute	LBH009	51	Male	NA	HCC	No	NA	3.5
Discovery	Liver cancer	Medical Genetics Institute	LBH010	68	Male	NA	HCC	No	NA	3.6
Discovery	Liver cancer	Medical Genetics Institute	LBH019	34	Male	II	Carcinoma	No	NA	2.5
Discovery	Liver cancer	Medical Genetics Institute	LBH025	63	Male	II	HCC	No	NA	2
Discovery	Liver cancer	Medical Genetics Institute	LBH027	27	Male	II	HCC	No	NA	2.5
Discovery	Liver cancer	Medical Genetics Institute	LBH030	66	Male	II	HCC	No	NA	NA
Discovery	Liver cancer	Medical Genetics Institute	LBH032	55	Male	II	HCC	No	NA	3.5
Discovery	Liver cancer	Medical Genetics Institute	LBH033	49	Male	II	HCC	No	NA	10.5
Discovery	Liver cancer	Medical Genetics Institute	LBH034	67	Female	II	HCC	No	NA	4.2
Discovery	Liver cancer	Medical Genetics Institute	LBH036	57	Male	II	HCC	No	NA	6.5
Discovery	Liver cancer	Medical Genetics Institute	LBH037	59	Male	I	Carcinoma	No	NA	3.4
Discovery	Liver cancer	Medical Genetics Institute	LBH040	58	Male	II	HCC	No	NA	4
Discovery	Liver cancer	Medical Genetics Institute	LBH044	25	Female	II	NA	No	1	9 x 7 x 6 cm
Discovery	Liver cancer	Medical Genetics Institute	LBH045	35	Male	II	HCC	No	NA	4
Discovery	Liver cancer	Medical Genetics Institute	LBH046	78	Male	II	NA	No	1	9,5 x 6,5 x 5 cm
Discovery	Liver cancer	Medical Genetics Institute	LBH047	63	Male	NA	HCC	No	NA	9
Discovery	Liver cancer	Medical Genetics Institute	LBH048	46	Male	NA	HCC	No	NA	7
Discovery	Liver cancer	Medical Genetics Institute	LBH049	52	Male	II	HCC	No	NA	2
Discovery	Liver cancer	Medical Genetics Institute	LBH050	58	Male	II	HCC	No	NA	4.5
Discovery	Liver cancer	Medical Genetics Institute	LBH051	70	Female	NA	HCC	No	NA	NA
Discovery	Liver cancer	Medical Genetics Institute	LBH052	54	Male	II	HCC	No	NA	7.3
Discovery	Liver cancer	Medical Genetics Institute	LBH054	57	Male	I	HCC	No	NA	4
Discovery	Liver cancer	Medic Medical Center	LBM005	57	Male	NA	NA	No	NA	6.1
Discovery	Liver cancer	Medic Medical Center	LBM006	72	Male	NA	NA	No	NA	0.7
Discovery	Liver cancer	Medic Medical Center	LBM010	46	Male	NA	HCC	No	NA	NA
Discovery	Liver cancer	Medic Medical Center	LBM016	32	Male	NA	HCC	No	NA	4
Discovery	Liver cancer	Medic Medical Center	LBM018	62	Male	NA	NA	No	NA	9.4
Discovery	Liver cancer	Medic Medical Center	LBM023	65	Male	NA	NA	No	NA	3.3
Discovery	Liver cancer	Medic Medical Center	LBM028	76	Female	NA	NA	No	NA	2.4
Discovery	Liver cancer	Medic Medical Center	LBM031	51	Male	NA	NA	No	NA	4.3
Discovery	Liver cancer	Medic Medical Center	LBM033	55	Male	NA	NA	No	NA	2
Discovery	Liver cancer	Medic Medical Center	LBM036	61	Female	NA	HCC	No	NA	NA
Discovery	Liver cancer	Medic Medical Center	LBM037	47	Male	NA	NA	No	NA	3.3
Discovery	Liver cancer	Medic Medical Center	LBM038	72	Male	NA	NA	No	NA	4
Discovery	Liver cancer	Medic Medical Center	LBM040	59	Female	NA	NA	No	NA	2.5
Discovery	Liver cancer	Medic Medical Center	LBM049R1	80	Female	NA	Carcinoma	No	NA	3.2
Discovery	Liver cancer	Medic Medical Center	LBM052R1	56	Male	NA	NA	No	NA	9.1
Discovery	Liver cancer	Medic Medical Center	LBM053	68	Male	NA	NA	No	NA	3.9
Discovery	Liver cancer	Medic Medical Center	LBM054R1	54	Male	NA	NA	No	NA	2.5
Discovery	Liver cancer	Medic Medical Center	LBM056R1	63	Female	NA	Carcinoma	No	NA	3
Discovery	Liver cancer	Medic Medical Center	LBM060	45	Female	NA	NA	No	NA	3.4
Discovery	Liver cancer	Medic Medical Center	LBM065	65	Male	NA	NA	No	NA	7
Discovery	Liver cancer	Medic Medical Center	LBM070	70	Male	NA	NA	No	NA	3.4
Discovery	Liver cancer	Medic Medical Center	LBM074	58	Male	NA	NA	No	NA	3.7
Discovery	Liver cancer	Medic Medical Center	LBM076	63	Male	NA	NA	No	NA	15.8
Discovery	Liver cancer	Medic Medical Center	LBM078	50	Male	NA	NA	No	NA	14.3
Discovery	Liver cancer	Medic Medical Center	LBM083	54	Male	NA	NA	No	NA	2.1
Discovery	Liver cancer	Medic Medical Center	LBM096	85	Male	NA	NA	No	NA	8.9
Discovery	Liver cancer	Medic Medical Center	LBM111R1	70	Female	NA	NA	No	NA	2.5
Discovery	Liver cancer	Medic Medical Center	LBM124	60	Male	NA	NA	No	NA	5.4
Discovery	Liver cancer	Medic Medical Center	LBM133	54	Male	NA	NA	No	NA	3
Discovery	Liver cancer	Medic Medical Center	LBM137	68	Male	NA	NA	No	NA	4
Discovery	Liver cancer	Medic Medical Center	LBM147	75	Female	NA	HCC	No	NA	NA
Discovery	Liver cancer	Medic Medical Center	LBM172	62	Female	NA	NA	No	NA	2
Discovery	Liver cancer	Medic Medical Center	LBM194	43	Male	NA	NA	No	NA	2.5
Discovery	Liver cancer	Medical Genetics Institute	MH021	39	Male	II	NA	No	1	6 cm
Discovery	Liver cancer	Medical Genetics Institute	MH036	39	Female	IIIA	NA	No	1	10 cm
Discovery	Liver cancer	Medical Genetics Institute	MH034	46	Male	II	NA	No	NA	NA
Discovery	Liver cancer	Medical Genetics Institute	MH016	48	Female	IIIA	NA	No	1	20 cm
Discovery	Liver cancer	Medical Genetics Institute	MH051	55	Male	IIIA	NA	No	2	10 cm
Discovery	Liver cancer	Medical Genetics Institute	MH017	57	Male	IIIA	NA	No	1	7 cm
Discovery	Liver cancer	Medical Genetics Institute	MH043	65	Male	II	NA	No	2	5 cm
Discovery	Liver cancer	Medical Genetics Institute	MH059	70	Male	II	NA	No	1	10 cm
Discovery	Liver cancer	Medical Genetics Institute	MH013	73	Male	II	NA	No	1	5 cm
Discovery	Liver cancer	Medical Genetics Institute	MH041	91	Female	IIIA	NA	No	1	10 cm
Discovery	Liver cancer	Medical Genetics Institute	MH022	38	Male	IIIA	NA	No	1	7 cm
Discovery	Liver cancer	Medical Genetics Institute	MH040	58	Male	IIIA	NA	No	1	12 cm
Discovery	Liver cancer	Medical Genetics Institute	MH046	58	Male	IIIA	NA	No	1	10 cm
Discovery	Liver cancer	Medical Genetics Institute	MH024	61	Male	IIIA	NA	No	1	12 cm
Discovery	Liver cancer	Medical Genetics Institute	MH032	63	Male	IIIA	NA	No	1	8 cm
Discovery	Liver cancer	Medical Genetics Institute	MH018	71	Male	IIIA	NA	No	1	16 cm
Discovery	Liver cancer	Medical Genetics Institute	MH020	72	Male	IIIA	NA	No	1	15 cm
Discovery	Lung cancer	Medical Genetics Institute	L10139	68	Male	IIIA	Carcinoma	No	NA	NA
Discovery	Lung cancer	Medical Genetics Institute	L11127	59	Male	IIIA	Carcinoma	No	NA	NA
Discovery	Lung cancer	Medical Genetics Institute	L11264	57	Male	IIIA	Carcinoma	No	NA	NA
Discovery	Lung cancer	Medical Genetics Institute	L11290	70	Male	IIIA	Carcinoma	No	NA	NA
Discovery	Lung cancer	Medical Genetics Institute	L11333	63	Male	IIIA	Carcinoma	No	NA	NA
Discovery	Lung cancer	Medical Genetics Institute	L11397	92	Male	IIIA	Carcinoma	No	NA	NA
Discovery	Lung cancer	Medical Genetics Institute	L11461	33	Male	IIIA	Carcinoma	No	NA	NA
Discovery	Lung cancer	Medical Genetics Institute	L11468	57	Male	IIIA	Carcinoma	No	NA	NA
Discovery	Lung cancer	Medical Genetics Institute	L11485	81	Female	IIIA	Carcinoma	No	NA	NA
Discovery	Lung cancer	Medical Genetics Institute	L11536	74	Male	IIIA	Carcinoma	No	NA	NA
Discovery	Lung cancer	Medical Genetics Institute	L11645	42	Female	IIIA	Carcinoma	No	NA	NA
Discovery	Lung cancer	Medical Genetics Institute	L11673	81	Male	IIIA	Carcinoma	No	NA	NA
Discovery	Lung cancer	Medical Genetics Institute	L11775	46	Female	IIIA	Carcinoma	No	NA	NA
Discovery	Lung cancer	Medical Genetics Institute	L11824	74	Female	II	Carcinoma	No	NA	NA
Discovery	Lung cancer	Medical Genetics Institute	L11886	53	Male	IIIA	Carcinoma	No	NA	NA
Discovery	Lung cancer	Medical Genetics Institute	L11969	66	Male	IIIA	Carcinoma	No	NA	NA
Discovery	Lung cancer	Medical Genetics Institute	L11977	70	Male	IIIA	Carcinoma	No	NA	NA
Discovery	Lung cancer	Medical Genetics Institute	L11980	89	Male	IIIA	Carcinoma	No	NA	NA
Discovery	Lung cancer	Medical Genetics Institute	L12008	46	Male	IIIA	Carcinoma	No	NA	NA
Discovery	Lung cancer	Medical Genetics Institute	L12012	61	Male	IIIA	Carcinoma	No	NA	NA
Discovery	Lung cancer	Medical Genetics Institute	L12032R	85	Male	IIIA	Carcinoma	No	NA	NA
Discovery	Lung cancer	Medical Genetics Institute	L12064	58	Male	IIIA	Carcinoma	No	NA	NA
Discovery	Lung cancer	Medical Genetics Institute	L12072	65	Female	IIIA	Carcinoma	No	NA	NA
Discovery	Lung cancer	Medical Genetics Institute	L12084	70	Female	IIIA	Carcinoma	No	NA	NA
Discovery	Lung cancer	Medical Genetics Institute	L12113	60	Male	IIIA	Carcinoma	No	NA	NA
Discovery	Lung cancer	Medical Genetics Institute	L12122	67	Male	IIA	Carcinoma	No	NA	NA
Discovery	Lung cancer	Medical Genetics Institute	L12143	72	Male	IIIA	Carcinoma	No	NA	NA
Discovery	Lung cancer	Medical Genetics Institute	L12311R	72	Female	IIIA	Carcinoma	No	NA	NA
Discovery	Lung cancer	Medical Genetics Institute	L12377R	57	Male	IIIA	Carcinoma	No	NA	NA
Discovery	Lung cancer	Medical Genetics Institute	L12397R	91	Female	IIIA	Carcinoma	No	NA	NA
Discovery	Lung cancer	Medical Genetics Institute	L12441	58	Male	IIB	Carcinoma	No	NA	NA
Discovery	Lung cancer	Medical Genetics Institute	L12562R	66	Male	IIIA	Carcinoma	No	NA	NA
Discovery	Lung cancer	Medical Genetics Institute	L12610R	80	Female	IIIA	Carcinoma	No	NA	NA
Discovery	Lung cancer	Medical Genetics Institute	L12611R	65	Male	IIIA	Carcinoma	No	NA	NA
Discovery	Lung cancer	Medical Genetics Institute	L12722R	57	Male	IIIA	Carcinoma	No	NA	NA
Discovery	Lung cancer	Medical Genetics Institute	L12740	55	Female	IIIA	Carcinoma	No	NA	NA
Discovery	Lung cancer	Medical Genetics Institute	L12781R	63	Male	IIIA	Carcinoma	No	NA	31 mm
Discovery	Lung cancer	Medical Genetics Institute	L13022	70	Male	IIIA	Carcinoma	No	NA	NA
Discovery	Lung cancer	Medical Genetics Institute	L13050	54	Female	IIIA	Carcinoma	No	NA	NA
Discovery	Lung cancer	Medical Genetics Institute	L13063R	75	Male	IIIA	Carcinoma	No	NA	NA
Discovery	Lung cancer	Medical Genetics Institute	L13149	65	Female	IIIA	Carcinoma	No	NA	NA
Discovery	Lung cancer	Medical Genetics Institute	L13187	64	Male	IIIA	Carcinoma	No	NA	NA
Discovery	Lung cancer	Medical Genetics Institute	LAAA10	64	Male	NA	Carcinoma	No	NA	NA
Discovery	Lung cancer	Medical Genetics Institute	LAAA27	53	Male	NA	Carcinoma	No	NA	NA
Discovery	Lung cancer	Medical Genetics Institute	LAAA35	71	Female	NA	Carcinoma	No	NA	NA
Discovery	Lung cancer	Medical Genetics Institute	LAAA59	63	Female	NA	Carcinoma	No	NA	NA
Discovery	Lung cancer	Medical Genetics Institute	LAAA77	72	Female	NA	Carcinoma	No	NA	NA
Discovery	Lung cancer	Medical Genetics Institute	LAAA90	60	Male	NA	Carcinoma	No	NA	NA
Discovery	Lung cancer	Medical Genetics Institute	LAAB12	59	Female	NA	Carcinoma	No	NA	NA
Discovery	Lung cancer	Medical Genetics Institute	LAAB22	69	Female	NA	Carcinoma	No	NA	NA
Discovery	Lung cancer	Medical Genetics Institute	LAAB49	48	Female	IIIA	Carcinoma	No	NA	NA
Discovery	Lung cancer	Medical Genetics Institute	LAAB63	61	Female	NA	Carcinoma	No	NA	NA
Discovery	Lung cancer	Medical Genetics Institute	LAAB85	88	Male	NA	Carcinoma	No	NA	NA
Discovery	Lung cancer	Medical Genetics Institute	LAAB97	65	Female	NA	Carcinoma	No	NA	NA
Discovery	Lung cancer	Medical Genetics Institute	LAAC04	82	Female	NA	Carcinoma	No	NA	NA
Discovery	Lung cancer	Medical Genetics Institute	LAAC10	63	Male	NA	Carcinoma	No	NA	NA
Discovery	Lung cancer	Medical Genetics Institute	LAAC12	66	Female	NA	Carcinoma	No	NA	NA
Discovery	Lung cancer	Medical Genetics Institute	LAAC13	80	Male	NA	Carcinoma	No	NA	NA
Discovery	Lung cancer	Medical Genetics Institute	LAAC14	78	Male	NA	Carcinoma	No	NA	NA
Discovery	Lung cancer	Medical Genetics Institute	LAAC20	58	Male	NA	Carcinoma	No	NA	NA
Discovery	Lung cancer	Medical Genetics Institute	LAAC23	73	Male	NA	Carcinoma	No	NA	NA
Discovery	Lung cancer	Medical Genetics Institute	LAAC42	52	Female	NA	Carcinoma	No	NA	NA
Discovery	Lung cancer	Medical Genetics Institute	LAAC58	57	Female	NA	Carcinoma	No	NA	NA
Discovery	Lung cancer	Medical Genetics Institute	LAAC69	75	Female	NA	Carcinoma	No	NA	NA
Discovery	Lung cancer	Medical Genetics Institute	LAAC85	59	Male	NA	Carcinoma	No	NA	NA
Discovery	Lung cancer	Medical Genetics Institute	LAAC86	47	Male	NA	Carcinoma	No	NA	NA
Discovery	Lung cancer	Medical Genetics Institute	LAAC87	42	Female	NA	Carcinoma	No	NA	NA
Discovery	Lung cancer	Medical Genetics Institute	LAAC94	92	Female	NA	Carcinoma	No	NA	NA
Discovery	Lung cancer	Medical Genetics Institute	LAAD03	70	Male	NA	Carcinoma	No	NA	NA
Discovery	Lung cancer	Medical Genetics Institute	LAAD34	78	Male	NA	Carcinoma	No	NA	NA
Discovery	Lung cancer	Medical Genetics Institute	LAAD44	68	Male	IIIA	Carcinoma	No	NA	NA
Discovery	Lung cancer	Medical Genetics Institute	LAAD69	75	Female	IIIA	Carcinoma	No	NA	NA
Discovery	Lung cancer	Medical Genetics Institute	LAAD70	50	Male	IIIA	Carcinoma	No	NA	NA
Discovery	Lung cancer	Medical Genetics Institute	LAAD84	77	Male	NA	Carcinoma	No	NA	NA
Discovery	Lung cancer	Medical Genetics Institute	LAAE19	61	Female	NA	Carcinoma	No	NA	NA
Discovery	Lung cancer	Medical Genetics Institute	LAAF05	69	Male	NA	Carcinoma	No	NA	NA
Discovery	Lung cancer	Medical Genetics Institute	LAAF10	80	Female	NA	Carcinoma	No	NA	NA
Discovery	Lung cancer	Medical Genetics Institute	LAAF20	65	Female	NA	Carcinoma	No	NA	NA
Discovery	Lung cancer	Medical Genetics Institute	LAAF30	52	Female	IIIA	Carcinoma	No	NA	NA
Discovery	Lung cancer	Medical Genetics Institute	LAAF61	52	Male	NA	Carcinoma	No	NA	NA
Discovery	Lung cancer	Medical Genetics Institute	LAAG88	82	Male	IIIA	Carcinoma	No	NA	NA
Discovery	Lung cancer	Medical Genetics Institute	LAAH23R1	59	Female	IIIA	Carcinoma	No	NA	NA
Discovery	Lung cancer	Medical Genetics Institute	LBLP01	55	Female	IA	NA	No	NA	NA
Discovery	Lung cancer	Medical Genetics Institute	LBLP03	65	Female	IIIA	NA	No	NA	NA
Discovery	Lung cancer	Medical Genetics Institute	LBLP04	56	Male	IIA	NA	No	NA	NA
Discovery	Lung cancer	Medical Genetics Institute	LBLP05	44	Male	IIA	NA	No	NA	NA
Discovery	Lung cancer	Medical Genetics Institute	LBLP06	55	Male	IIA	NA	No	NA	NA
Discovery	Lung cancer	Medical Genetics Institute	LBLP07	66	Female	IIB	NA	No	NA	NA
Discovery	Lung cancer	Medical Genetics Institute	LBLP08	66	Female	IIA	NA	No	NA	NA
Discovery	Lung cancer	Medical Genetics Institute	LBLP09	68	Male	IIA	NA	No	NA	NA
Discovery	Lung cancer	Medical Genetics Institute	LBLP10	46	Female	IIA	NA	No	NA	NA
Discovery	Lung cancer	Medical Genetics Institute	MPAA01	49	Female	I	NA	No	NA	NA
Discovery	Lung cancer	Medical Genetics Institute	YCAA90	70	Male	II	Carcinoma	No	NA	NA
Validation	Control	Medical Genetics Institute	K0102	40	Male	NA	NA	NA	NA	NA
Validation	Control	Medical Genetics Institute	K0104R1	62	Male	NA	NA	NA	NA	NA
Validation	Control	Medical Genetics Institute	K0113	43	Male	NA	NA	NA	NA	NA
Validation	Control	Medical Genetics Institute	K0116	45	Male	NA	NA	NA	NA	NA
Validation	Control	Medical Genetics Institute	K0117	48	Male	NA	NA	NA	NA	NA
Validation	Control	Medical Genetics Institute	K0126	41	Female	NA	NA	NA	NA	NA
Validation	Control	Hanoi Medical University	K0131	45	Female	NA	NA	NA	NA	NA
Validation	Control	Hanoi Medical University	K0133	43	Male	NA	NA	NA	NA	NA
Validation	Control	Hanoi Medical University	K0135	52	Female	NA	NA	NA	NA	NA
Validation	Control	Hanoi Medical University	K0136	45	Female	NA	NA	NA	NA	NA
Validation	Control	Medical Genetics Institute	K0139	46	Male	NA	NA	NA	NA	NA
Validation	Control	Medical Genetics Institute	K0142	40	Male	NA	NA	NA	NA	NA
Validation	Control	Medical Genetics Institute	K0143	52	Female	NA	NA	NA	NA	NA
Validation	Control	Medical Genetics Institute	K0146	60	Female	NA	NA	NA	NA	NA
Validation	Control	Medical Genetics Institute	K0147	53	Male	NA	NA	NA	NA	NA
Validation	Control	Medical Genetics Institute	K0148	48	Female	NA	NA	NA	NA	NA
Validation	Control	Medical Genetics Institute	K0151	54	Female	NA	NA	NA	NA	NA
Validation	Control	Medical Genetics Institute	K0153	45	Male	NA	NA	NA	NA	NA
Validation	Control	Medic Medical Center	K0897	44	Male	NA	NA	NA	NA	NA
Validation	Control	Medical Genetics Institute	K0899	48	Male	NA	NA	NA	NA	NA
Validation	Control	Medical Genetics Institute	K0900	44	Female	NA	NA	NA	NA	NA
Validation	Control	Medical Genetics Institute	K0902	57	Male	NA	NA	NA	NA	NA
Validation	Control	Medical University of Hochiminh city	K0904	44	Female	NA	NA	NA	NA	NA
Validation	Control	Medical University of Hochiminh city	K0905	41	Female	NA	NA	NA	NA	NA
Validation	Control	Medic Medical Center	K0906	45	Male	NA	NA	NA	NA	NA
Validation	Control	Medic Medical Center	K0909	44	Female	NA	NA	NA	NA	NA
Validation	Control	Medic Medical Center	K0910	50	Male	NA	NA	NA	NA	NA
Validation	Control	Medic Medical Center	K0912	49	Female	NA	NA	NA	NA	NA
Validation	Control	Medic Medical Center	K0913	41	Female	NA	NA	NA	NA	NA
Validation	Control	Medic Medical Center	K0915	45	Female	NA	NA	NA	NA	NA
Validation	Control	Medic Medical Center	K0916	53	Female	NA	NA	NA	NA	NA
Validation	Control	Medic Medical Center	K0919	51	Male	NA	NA	NA	NA	NA
Validation	Control	Medical University of Hochiminh city	K0925	63	Female	NA	NA	NA	NA	NA
Validation	Control	Medical University of Hochiminh city	K0926	59	Female	NA	NA	NA	NA	NA
Validation	Control	Medical University of Hochiminh city	K0927	62	Female	NA	NA	NA	NA	NA
Validation	Control	Medical University of Hochiminh city	K0929	46	Female	NA	NA	NA	NA	NA
Validation	Control	Medic Medical Center	K0933	58	Female	NA	NA	NA	NA	NA
Validation	Control	Medic Medical Center	K0935	61	Female	NA	NA	NA	NA	NA
Validation	Control	Medic Medical Center	K0937	43	Male	NA	NA	NA	NA	NA
Validation	Control	Medic Medical Center	K0938	55	Female	NA	NA	NA	NA	NA
Validation	Control	Medic Medical Center	K0939	57	Male	NA	NA	NA	NA	NA
Validation	Control	Medic Medical Center	K0940	41	Male	NA	NA	NA	NA	NA
Validation	Control	Medic Medical Center	K0944	43	Female	NA	NA	NA	NA	NA
Validation	Control	Medic Medical Center	K0945	44	Female	NA	NA	NA	NA	NA
Validation	Control	Medic Medical Center	K0947	57	Male	NA	NA	NA	NA	NA
Validation	Control	Medic Medical Center	K0948	52	Female	NA	NA	NA	NA	NA
Validation	Control	Medical Genetics Institute	K0967	51	Male	NA	NA	NA	NA	NA
Validation	Control	Medical Genetics Institute	K0971	44	Female	NA	NA	NA	NA	NA
Validation	Control	Medical Genetics Institute	K0972	46	Male	NA	NA	NA	NA	NA
Validation	Control	Medical Genetics Institute	K0976	42	Male	NA	NA	NA	NA	NA
Validation	Control	Medical Genetics Institute	K0977	60	Male	NA	NA	NA	NA	NA
Validation	Control	Medical Genetics Institute	K0979	59	Female	NA	NA	NA	NA	NA
Validation	Control	Medical Genetics Institute	K0981	60	Female	NA	NA	NA	NA	NA
Validation	Control	Medical Genetics Institute	K0983	62	Female	NA	NA	NA	NA	NA
Validation	Control	Medical Genetics Institute	K0984	59	Male	NA	NA	NA	NA	NA
Validation	Control	Medical Genetics Institute	K0986	54	Male	NA	NA	NA	NA	NA
Validation	Control	Medical Genetics Institute	K0989	55	Male	NA	NA	NA	NA	NA
Validation	Control	Medical Genetics Institute	K0993	57	Female	NA	NA	NA	NA	NA
Validation	Control	Medical Genetics Institute	K0996	62	Female	NA	NA	NA	NA	NA
Validation	Control	Medical Genetics Institute	K0997	41	Female	NA	NA	NA	NA	NA
Validation	Control	Medical Genetics Institute	K0AA82	50	Male	NA	NA	NA	NA	NA
Validation	Control	Medical Genetics Institute	K0AA83	57	Male	NA	NA	NA	NA	NA
Validation	Control	Medical Genetics Institute	K1086	41	Male	NA	NA	NA	NA	NA
Validation	Control	Medical Genetics Institute	K1092	50	Male	NA	NA	NA	NA	NA
Validation	Control	Medic Medical Center	K1133	53	Male	NA	NA	NA	NA	NA
Validation	Control	Medical Genetics Institute	K1203	57	Male	NA	NA	NA	NA	NA
Validation	Control	Medical Genetics Institute	K1212	41	Male	NA	NA	NA	NA	NA
Validation	Control	Medical Genetics Institute	K1214	48	Male	NA	NA	NA	NA	NA
Validation	Control	Medical Genetics Institute	K1215	59	Male	NA	NA	NA	NA	NA
Validation	Control	Medic Medical Center	K1217	59	Female	NA	NA	NA	NA	NA
Validation	Control	Medical University of Hochiminh city	K1220	58	Female	NA	NA	NA	NA	NA
Validation	Control	Medical University of Hochiminh city	K1224	52	Female	NA	NA	NA	NA	NA
Validation	Control	Medical University of Hochiminh city	K1225	58	Male	NA	NA	NA	NA	NA
Validation	Control	Medical University of Hochiminh city	K1232	58	Female	NA	NA	NA	NA	NA
Validation	Control	Medical University of Hochiminh city	K1237	42	Male	NA	NA	NA	NA	NA
Validation	Control	Medical Genetics Institute	K1244	48	Female	NA	NA	NA	NA	NA
Validation	Control	Medical University of Hochiminh city	K1247	50	Male	NA	NA	NA	NA	NA
Validation	Control	Medical University of Hochiminh city	K1248	50	Male	NA	NA	NA	NA	NA
Validation	Control	Medical University of Hochiminh city	K1249	44	Male	NA	NA	NA	NA	NA
Validation	Control	Medical Genetics Institute	K1283	57	Male	NA	NA	NA	NA	NA
Validation	Control	Medical University of Hochiminh city	K1309	50	Female	NA	NA	NA	NA	NA
Validation	Control	Medical University of Hochiminh city	K1321	62	Male	NA	NA	NA	NA	NA
Validation	Control	Medical University of Hochiminh city	K1322	52	Male	NA	NA	NA	NA	NA
Validation	Control	Medical University of Hochiminh city	K1324	59	Female	NA	NA	NA	NA	NA
Validation	Control	Medical University of Hochiminh city	K1341	44	Female	NA	NA	NA	NA	NA
Validation	Control	Medical Genetics Institute	K1348	54	Female	NA	NA	NA	NA	NA
Validation	Control	Medical Genetics Institute	K1349	62	Female	NA	NA	NA	NA	NA
Validation	Control	Hanoi Medical University	K1354	48	Male	NA	NA	NA	NA	NA
Validation	Control	Medical Genetics Institute	K1364	62	Female	NA	NA	NA	NA	NA
Validation	Control	Medical Genetics Institute	K1366	41	Male	NA	NA	NA	NA	NA
Validation	Control	Medical Genetics Institute	K1367	59	Female	NA	NA	NA	NA	NA
Validation	Control	Medical Genetics Institute	K1370	42	Female	NA	NA	NA	NA	NA
Validation	Control	Medical Genetics Institute	K1380	60	Male	NA	NA	NA	NA	NA
Validation	Control	Medical Genetics Institute	K1396	45	Female	NA	NA	NA	NA	NA
Validation	Control	Medical Genetics Institute	K1408	43	Female	NA	NA	NA	NA	NA
Validation	Control	Medical Genetics Institute	K1420	50	Female	NA	NA	NA	NA	NA
Validation	Control	Medical Genetics Institute	K1500	54	Female	NA	NA	NA	NA	NA
Validation	Control	Hanoi Medical University	K1564	47	Female	NA	NA	NA	NA	NA
Validation	Control	Medical Genetics Institute	K1634	47	Female	NA	NA	NA	NA	NA
Validation	Control	Medical Genetics Institute	K1644R2	61	Male	NA	NA	NA	NA	NA
Validation	Control	Medical Genetics Institute	K1651R2	43	Female	NA	NA	NA	NA	NA
Validation	Control	Medical Genetics Institute	K1902	43	Female	NA	NA	NA	NA	NA
Validation	Control	Medical Genetics Institute	K1915	51	Female	NA	NA	NA	NA	NA
Validation	Control	Medical Genetics Institute	K1920	41	Male	NA	NA	NA	NA	NA
Validation	Control	Medical Genetics Institute	K1934	42	Male	NA	NA	NA	NA	NA
Validation	Control	Medical Genetics Institute	K1935	52	Female	NA	NA	NA	NA	NA
Validation	Control	Medical Genetics Institute	K1939	48	Female	NA	NA	NA	NA	NA
Validation	Control	Medical Genetics Institute	K1940	56	Male	NA	NA	NA	NA	NA
Validation	Control	Medical Genetics Institute	K1941	50	Female	NA	NA	NA	NA	NA
Validation	Control	Medical Genetics Institute	K1942	48	Female	NA	NA	NA	NA	NA
Validation	Control	Medical Genetics Institute	K1945	58	Female	NA	NA	NA	NA	NA
Validation	Control	Medical Genetics Institute	K1948	54	Male	NA	NA	NA	NA	NA
Validation	Control	Medical Genetics Institute	K1955	41	Female	NA	NA	NA	NA	NA
Validation	Control	Medical Genetics Institute	K1956	44	Male	NA	NA	NA	NA	NA
Validation	Control	Medical Genetics Institute	K1957	51	Female	NA	NA	NA	NA	NA
Validation	Control	Medical Genetics Institute	K1960	43	Female	NA	NA	NA	NA	NA
Validation	Control	Medical Genetics Institute	K1979	40	Female	NA	NA	NA	NA	NA
Validation	Control	Medical Genetics Institute	K1998	41	Female	NA	NA	NA	NA	NA
Validation	Control	Medical Genetics Institute	K1AB52	59	Male	NA	NA	NA	NA	NA
Validation	Control	Medical Genetics Institute	K1AB56	58	Female	NA	NA	NA	NA	NA
Validation	Control	Medical Genetics Institute	K1AB60	85	Female	NA	NA	NA	NA	NA
Validation	Control	Medical Genetics Institute	K1AB61	42	Male	NA	NA	NA	NA	NA
Validation	Control	Medical Genetics Institute	K1AB72	51	Male	NA	NA	NA	NA	NA
Validation	Control	Medical Genetics Institute	K2086	52	Female	NA	NA	NA	NA	NA
Validation	Control	Medical Genetics Institute	K2113R1	42	Female	NA	NA	NA	NA	NA
Validation	Control	Medical Genetics Institute	K2124	44	Female	NA	NA	NA	NA	NA
Validation	Control	Medical Genetics Institute	K2125	62	Female	NA	NA	NA	NA	NA
Validation	Control	Medical Genetics Institute	K2126	54	Female	NA	NA	NA	NA	NA
Validation	Control	Medical Genetics Institute	K2128	56	Female	NA	NA	NA	NA	NA
Validation	Control	Medical Genetics Institute	K2151	53	Female	NA	NA	NA	NA	NA
Validation	Control	Medical Genetics Institute	K2152	61	Female	NA	NA	NA	NA	NA
Validation	Control	Medical Genetics Institute	K2154	54	Female	NA	NA	NA	NA	NA
Validation	Control	Medical Genetics Institute	K2156	41	Male	NA	NA	NA	NA	NA
Validation	Control	Medical Genetics Institute	K2160	40	Male	NA	NA	NA	NA	NA
Validation	Control	Medical Genetics Institute	K2167	55	Male	NA	NA	NA	NA	NA
Validation	Control	Medical Genetics Institute	K2184	42	Female	NA	NA	NA	NA	NA
Validation	Control	Hanoi Medical University	K2349	48	Female	NA	NA	NA	NA	NA
Validation	Control	Hanoi Medical University	K2366	45	Female	NA	NA	NA	NA	NA
Validation	Control	Hanoi Medical University	K2372	46	Female	NA	NA	NA	NA	NA
Validation	Control	Hanoi Medical University	K2411	43	Female	NA	NA	NA	NA	NA
Validation	Control	Hanoi Medical University	K2424	63	Male	NA	NA	NA	NA	NA
Validation	Control	Hanoi Medical University	K2433	41	Male	NA	NA	NA	NA	NA
Validation	Control	Hanoi Medical University	K2444	56	Male	NA	NA	NA	NA	NA
Validation	Control	Medical Genetics Institute	K2558	57	Male	NA	NA	NA	NA	NA
Validation	Control	Medical Genetics Institute	K2583	48	Female	NA	NA	NA	NA	NA
Validation	Control	Medical Genetics Institute	K6AA15	32	Female	NA	NA	NA	NA	NA
Validation	Control	Medical Genetics Institute	K6AA16	63	Male	NA	NA	NA	NA	NA
Validation	Control	Medical Genetics Institute	KAAA52	28	Female	NA	NA	NA	NA	NA
Validation	Control	Medical Genetics Institute	KAAA74	27	Male	NA	NA	NA	NA	NA
Validation	Control	Medical Genetics Institute	KAAA75	29	Female	NA	NA	NA	NA	NA
Validation	Control	Medical Genetics Institute	KAAB44	22	Female	NA	NA	NA	NA	NA
Validation	Control	Medical Genetics Institute	KAAF82	28	Female	NA	NA	NA	NA	NA
Validation	Control	Medical Genetics Institute	KAAG54	27	Female	NA	NA	NA	NA	NA
Validation	Control	Medical Genetics Institute	KAAG79	22	Female	NA	NA	NA	NA	NA
Validation	Control	Medical Genetics Institute	KAAH33	23	Female	NA	NA	NA	NA	NA
Validation	Control	Medical Genetics Institute	KAAH75	26	Female	NA	NA	NA	NA	NA
Validation	Control	Medical Genetics Institute	KAAI93	29	Male	NA	NA	NA	NA	NA
Validation	Control	Medical Genetics Institute	KAAI98	21	Male	NA	NA	NA	NA	NA
Validation	Control	Medical Genetics Institute	KAAJ01	19	Female	NA	NA	NA	NA	NA
Validation	Control	Medical Genetics Institute	KAAL54	25	Male	NA	NA	NA	NA	NA
Validation	Control	Medical Genetics Institute	KAAL55	28	Male	NA	NA	NA	NA	NA
Validation	Control	Medical Genetics Institute	KABE89	28	Female	NA	NA	NA	NA	NA
Validation	Control	Medical Genetics Institute	KABE96	25	Male	NA	NA	NA	NA	NA
Validation	Control	Medical Genetics Institute	KABE97	28	Female	NA	NA	NA	NA	NA
Validation	Control	Medical Genetics Institute	KABF14	26	Female	NA	NA	NA	NA	NA
Validation	Control	Medical Genetics Institute	KABF71	27	Male	NA	NA	NA	NA	NA
Validation	Control	Medical Genetics Institute	KABF72	27	Male	NA	NA	NA	NA	NA
Validation	Control	Medical Genetics Institute	KABG18	26	Female	NA	NA	NA	NA	NA
Validation	Control	Medical Genetics Institute	KABG50	25	Male	NA	NA	NA	NA	NA
Validation	Control	Medical Genetics Institute	KABG85	25	Female	NA	NA	NA	NA	NA
Validation	Control	Medical Genetics Institute	KABG87	25	Female	NA	NA	NA	NA	NA
Validation	Control	Medical Genetics Institute	KABG90	24	Female	NA	NA	NA	NA	NA
Validation	Control	Medical Genetics Institute	KABG94	26	Female	NA	NA	NA	NA	NA
Validation	Control	Medical Genetics Institute	KABG99	26	Female	NA	NA	NA	NA	NA
Validation	Control	Medical Genetics Institute	KABH32	76	Female	NA	NA	NA	NA	NA
Validation	Control	Medical Genetics Institute	KABH38	41	Female	NA	NA	NA	NA	NA
Validation	Control	Medical Genetics Institute	KABH39	41	Female	NA	NA	NA	NA	NA
Validation	Control	Medical Genetics Institute	KABH41	51	Female	NA	NA	NA	NA	NA
Validation	Control	Medical Genetics Institute	KABH42	35	Female	NA	NA	NA	NA	NA
Validation	Control	Medical Genetics Institute	KABH44	55	Female	NA	NA	NA	NA	NA
Validation	Control	Medical Genetics Institute	KABH47	36	Female	NA	NA	NA	NA	NA
Validation	Control	Medical Genetics Institute	KABH48	28	Female	NA	NA	NA	NA	NA
Validation	Control	Medical Genetics Institute	KABH49	31	Female	NA	NA	NA	NA	NA
Validation	Control	Medical Genetics Institute	KABH50	59	Female	NA	NA	NA	NA	NA
Validation	Control	Medical Genetics Institute	KABH51	59	Female	NA	NA	NA	NA	NA
Validation	Control	Medical Genetics Institute	KABH54	58	Female	NA	NA	NA	NA	NA
Validation	Control	Medical Genetics Institute	KABH61	62	Male	NA	NA	NA	NA	NA
Validation	Control	Medical Genetics Institute	KABH62	51	Female	NA	NA	NA	NA	NA
Validation	Control	Medical Genetics Institute	KABH63	50	Female	NA	NA	NA	NA	NA
Validation	Control	Medical Genetics Institute	KABH64	55	Male	NA	NA	NA	NA	NA
Validation	Control	Medical Genetics Institute	KABH66	32	Male	NA	NA	NA	NA	NA
Validation	Control	Medical Genetics Institute	KABH67	37	Male	NA	NA	NA	NA	NA
Validation	Control	Medical Genetics Institute	KABH68	38	Male	NA	NA	NA	NA	NA
Validation	Control	Medical Genetics Institute	KABH69	41	Male	NA	NA	NA	NA	NA
Validation	Control	Medical Genetics Institute	KABH71	54	Female	NA	NA	NA	NA	NA
Validation	Control	Medical Genetics Institute	KABH72	36	Female	NA	NA	NA	NA	NA
Validation	Control	Medical Genetics Institute	KABH73	40	Male	NA	NA	NA	NA	NA
Validation	Control	Medical Genetics Institute	KABH74	42	Male	NA	NA	NA	NA	NA
Validation	Control	Medical Genetics Institute	KABH75	70	Female	NA	NA	NA	NA	NA
Validation	Control	Medical Genetics Institute	KABH76	39	Male	NA	NA	NA	NA	NA
Validation	Control	Medical Genetics Institute	KABH77	47	Female	NA	NA	NA	NA	NA
Validation	Control	Medical Genetics Institute	KABH78	31	Male	NA	NA	NA	NA	NA
Validation	Control	Medical Genetics Institute	KABH79	63	Male	NA	NA	NA	NA	NA
Validation	Control	Medical Genetics Institute	KABH80	57	Male	NA	NA	NA	NA	NA
Validation	Control	Medical Genetics Institute	KABH81	49	Female	NA	NA	NA	NA	NA
Validation	Control	Medical Genetics Institute	KABH82	40	Male	NA	NA	NA	NA	NA
Validation	Control	Medical Genetics Institute	KABH83	35	Female	NA	NA	NA	NA	NA
Validation	Control	Medical Genetics Institute	KABH84	53	Male	NA	NA	NA	NA	NA
Validation	Control	Medical Genetics Institute	KABH85	32	Male	NA	NA	NA	NA	NA
Validation	Control	Medical Genetics Institute	KABH86	45	Female	NA	NA	NA	NA	NA
Validation	Control	Medical Genetics Institute	KABH87	34	Male	NA	NA	NA	NA	NA
Validation	Control	Medical Genetics Institute	KABH88	42	Male	NA	NA	NA	NA	NA
Validation	Control	Medical Genetics Institute	KABH89	35	Female	NA	NA	NA	NA	NA
Validation	Control	Medical Genetics Institute	KABH90	44	Male	NA	NA	NA	NA	NA
Validation	Control	Medical Genetics Institute	KABH91	41	Female	NA	NA	NA	NA	NA
Validation	Control	Medical Genetics Institute	KABH92	32	Female	NA	NA	NA	NA	NA
Validation	Control	Medical Genetics Institute	KABH93	34	Male	NA	NA	NA	NA	NA
Validation	Control	Medical Genetics Institute	KABH94	61	Female	NA	NA	NA	NA	NA
Validation	Control	Medical Genetics Institute	KABH95	46	Female	NA	NA	NA	NA	NA
Validation	Control	Medical Genetics Institute	KABH97	44	Female	NA	NA	NA	NA	NA
Validation	Control	Medical Genetics Institute	KABH98	37	Female	NA	NA	NA	NA	NA
Validation	Control	Medical Genetics Institute	KABH99	48	Male	NA	NA	NA	NA	NA
Validation	Control	Medical Genetics Institute	KABI03	48	Female	NA	NA	NA	NA	NA
Validation	Control	Medical Genetics Institute	KABI04	54	Male	NA	NA	NA	NA	NA
Validation	Control	Medical Genetics Institute	KABI05	51	Female	NA	NA	NA	NA	NA
Validation	Control	Medical Genetics Institute	KABI09	33	Male	NA	NA	NA	NA	NA
Validation	Control	Medical Genetics Institute	KABI10	57	Female	NA	NA	NA	NA	NA
Validation	Control	Medical Genetics Institute	KABI11	58	Male	NA	NA	NA	NA	NA
Validation	Control	Medical Genetics Institute	KABI13	47	Male	NA	NA	NA	NA	NA
Validation	Control	Medical Genetics Institute	KABI14	43	Male	NA	NA	NA	NA	NA
Validation	Control	Medical Genetics Institute	KABI15	45	Male	NA	NA	NA	NA	NA
Validation	Control	Medical Genetics Institute	KABI16	45	Male	NA	NA	NA	NA	NA
Validation	Control	Medical Genetics Institute	KABI17	48	Male	NA	NA	NA	NA	NA
Validation	Control	Medical Genetics Institute	KABI18	36	Female	NA	NA	NA	NA	NA
Validation	Control	Medical Genetics Institute	KABI20	61	Female	NA	NA	NA	NA	NA
Validation	Control	Medical Genetics Institute	KABI21	53	Female	NA	NA	NA	NA	NA
Validation	Control	Medical Genetics Institute	KABI22	40	Female	NA	NA	NA	NA	NA
Validation	Control	Medical Genetics Institute	KABI23	45	Female	NA	NA	NA	NA	NA
Validation	Control	Medical Genetics Institute	KABI24	49	Female	NA	NA	NA	NA	NA
Validation	Control	Medical Genetics Institute	KABI25	48	Female	NA	NA	NA	NA	NA
Validation	Control	Medical Genetics Institute	KABI26	42	Male	NA	NA	NA	NA	NA
Validation	Control	Medical Genetics Institute	KABI28	41	Female	NA	NA	NA	NA	NA
Validation	Control	Medical Genetics Institute	KABI29	56	Female	NA	NA	NA	NA	NA
Validation	Control	Medical Genetics Institute	KABI30	55	Male	NA	NA	NA	NA	NA
Validation	Control	Medical Genetics Institute	KABI31	45	Male	NA	NA	NA	NA	NA
Validation	Control	Medical Genetics Institute	KABI32	56	Female	NA	NA	NA	NA	NA
Validation	Control	Medical Genetics Institute	KABI33	44	Female	NA	NA	NA	NA	NA
Validation	Control	Medical Genetics Institute	KABI34	58	Female	NA	NA	NA	NA	NA
Validation	Control	Medical Genetics Institute	KABI35	39	Female	NA	NA	NA	NA	NA
Validation	Control	Medical Genetics Institute	KABI36	56	Male	NA	NA	NA	NA	NA
Validation	Control	Medical Genetics Institute	KABI37	32	Male	NA	NA	NA	NA	NA
Validation	Control	Medical Genetics Institute	KABI38	39	Male	NA	NA	NA	NA	NA
Validation	Control	Medical Genetics Institute	KABI39	37	Female	NA	NA	NA	NA	NA
Validation	Control	Medical Genetics Institute	KABI40	58	Female	NA	NA	NA	NA	NA
Validation	Control	Medical Genetics Institute	KABI41	61	Male	NA	NA	NA	NA	NA
Validation	Control	Medical Genetics Institute	KABI42	51	Female	NA	NA	NA	NA	NA
Validation	Control	Medical Genetics Institute	KABI43	54	Female	NA	NA	NA	NA	NA
Validation	Control	Medical Genetics Institute	KABI44	47	Female	NA	NA	NA	NA	NA
Validation	Control	Medical Genetics Institute	KABI45	56	Female	NA	NA	NA	NA	NA
Validation	Control	Medical Genetics Institute	KABI46	49	Female	NA	NA	NA	NA	NA
Validation	Control	Medical Genetics Institute	KABI48	54	Male	NA	NA	NA	NA	NA
Validation	Control	Medical Genetics Institute	KABI49	71	Female	NA	NA	NA	NA	NA
Validation	Control	Medical Genetics Institute	KABI50	59	Female	NA	NA	NA	NA	NA
Validation	Control	Medical Genetics Institute	KABI51	52	Male	NA	NA	NA	NA	NA
Validation	Control	Medical Genetics Institute	KABI52	51	Male	NA	NA	NA	NA	NA
Validation	Control	Medical Genetics Institute	KABI53	51	Female	NA	NA	NA	NA	NA
Validation	Control	Medical Genetics Institute	KABI54	35	Female	NA	NA	NA	NA	NA
Validation	Control	Medical Genetics Institute	KABI55	59	Female	NA	NA	NA	NA	NA
Validation	Control	Medical Genetics Institute	KABI56	34	Female	NA	NA	NA	NA	NA
Validation	Control	Medical Genetics Institute	KABI57	33	Female	NA	NA	NA	NA	NA
Validation	Control	Medical Genetics Institute	KABI58	62	Male	NA	NA	NA	NA	NA
Validation	Control	Medical Genetics Institute	KABI59	63	Female	NA	NA	NA	NA	NA
Validation	Control	Medical Genetics Institute	KABI60	40	Male	NA	NA	NA	NA	NA
Validation	Control	Medical Genetics Institute	KABI61	30	Male	NA	NA	NA	NA	NA
Validation	Control	Medical Genetics Institute	KABI62	38	Male	NA	NA	NA	NA	NA
Validation	Control	Medical Genetics Institute	KABI63	36	Female	NA	NA	NA	NA	NA
Validation	Control	Medical Genetics Institute	KABI64	38	Male	NA	NA	NA	NA	NA
Validation	Control	Medical Genetics Institute	KABI65	40	Male	NA	NA	NA	NA	NA
Validation	Control	Medical Genetics Institute	KABI67	28	Female	NA	NA	NA	NA	NA
Validation	Control	Medical Genetics Institute	KABI68	69	Male	NA	NA	NA	NA	NA
Validation	Control	Medical Genetics Institute	KABI69	36	Male	NA	NA	NA	NA	NA
Validation	Control	Medical Genetics Institute	KABI70	63	Female	NA	NA	NA	NA	NA
Validation	Control	Medical Genetics Institute	KABI71	27	Female	NA	NA	NA	NA	NA
Validation	Control	Medical Genetics Institute	KABI72	49	Female	NA	NA	NA	NA	NA
Validation	Control	Medical Genetics Institute	KABI73	41	Female	NA	NA	NA	NA	NA
Validation	Control	Medical Genetics Institute	KABI74	34	Male	NA	NA	NA	NA	NA
Validation	Control	Medical Genetics Institute	KABI75	42	Female	NA	NA	NA	NA	NA
Validation	Control	Medical Genetics Institute	KABI76	42	Male	NA	NA	NA	NA	NA
Validation	Control	Medical Genetics Institute	KABI77	33	Male	NA	NA	NA	NA	NA
Validation	Control	Medical Genetics Institute	KABI78	29	Female	NA	NA	NA	NA	NA
Validation	Control	Medical Genetics Institute	KABI79	64	Male	NA	NA	NA	NA	NA
Validation	Control	Medical Genetics Institute	KABI80	52	Female	NA	NA	NA	NA	NA
Validation	Control	Medical Genetics Institute	KABI81	61	Male	NA	NA	NA	NA	NA
Validation	Control	Medical Genetics Institute	KABI82	53	Female	NA	NA	NA	NA	NA
Validation	Control	Medical Genetics Institute	KABI83	42	Male	NA	NA	NA	NA	NA
Validation	Control	Medical Genetics Institute	KABI84	37	Female	NA	NA	NA	NA	NA
Validation	Control	Medical Genetics Institute	KABI85	68	Female	NA	NA	NA	NA	NA
Validation	Control	Medical Genetics Institute	KABI87	46	Female	NA	NA	NA	NA	NA
Validation	Control	Medical Genetics Institute	KABI88	60	Female	NA	NA	NA	NA	NA
Validation	Control	Medical Genetics Institute	KABI89	33	Male	NA	NA	NA	NA	NA
Validation	Control	Medical Genetics Institute	KABI90	32	Female	NA	NA	NA	NA	NA
Validation	Control	Medical Genetics Institute	KABI91	46	Male	NA	NA	NA	NA	NA
Validation	Control	Medical Genetics Institute	KABI92	27	Male	NA	NA	NA	NA	NA
Validation	Control	Medical Genetics Institute	KABI93	44	Female	NA	NA	NA	NA	NA
Validation	Control	Medical Genetics Institute	KABI94	48	Male	NA	NA	NA	NA	NA
Validation	Control	Medical Genetics Institute	KABI95	45	Female	NA	NA	NA	NA	NA
Validation	Control	Medical Genetics Institute	KABI97	36	Female	NA	NA	NA	NA	NA
Validation	Control	Medical Genetics Institute	KABI98	57	Female	NA	NA	NA	NA	NA
Validation	Control	Medical Genetics Institute	KABI99	38	Female	NA	NA	NA	NA	NA
Validation	Control	Medical Genetics Institute	KABJ01	36	Female	NA	NA	NA	NA	NA
Validation	Control	Medical Genetics Institute	KABJ02	59	Male	NA	NA	NA	NA	NA
Validation	Control	Medical Genetics Institute	KABJ03	59	Female	NA	NA	NA	NA	NA
Validation	Control	Medical Genetics Institute	KABJ04	61	Female	NA	NA	NA	NA	NA
Validation	Control	Medical Genetics Institute	KABJ07	76	Male	NA	NA	NA	NA	NA
Validation	Control	Medical Genetics Institute	KABJ09	33	Female	NA	NA	NA	NA	NA
Validation	Control	Medical Genetics Institute	KABJ11	39	Female	NA	NA	NA	NA	NA
Validation	Control	Medical Genetics Institute	KABJ12	32	Male	NA	NA	NA	NA	NA
Validation	Control	Medical Genetics Institute	KABJ14	42	Female	NA	NA	NA	NA	NA
Validation	Control	Medical Genetics Institute	KABJ15	47	Female	NA	NA	NA	NA	NA
Validation	Control	Medical Genetics Institute	KABJ16	57	Female	NA	NA	NA	NA	NA
Validation	Control	Medical Genetics Institute	KABJ20	58	Female	NA	NA	NA	NA	NA
Validation	Control	Medical Genetics Institute	KABJ21	60	Male	NA	NA	NA	NA	NA
Validation	Control	Medical Genetics Institute	KABJ27	52	Female	NA	NA	NA	NA	NA
Validation	Control	Medical Genetics Institute	KABJ28	30	Female	NA	NA	NA	NA	NA
Validation	Control	Medical Genetics Institute	KABJ35	28	Male	NA	NA	NA	NA	NA
Validation	Control	Medical Genetics Institute	KABJ45	39	Female	NA	NA	NA	NA	NA
Validation	Control	Medical Genetics Institute	KABJ46	43	Female	NA	NA	NA	NA	NA
Validation	Control	Medical Genetics Institute	KABJ47	44	Female	NA	NA	NA	NA	NA
Validation	Control	Medical Genetics Institute	KABJ58	45	Female	NA	NA	NA	NA	NA
Validation	Control	Medical Genetics Institute	KABJ60	59	Female	NA	NA	NA	NA	NA
Validation	Control	Medical Genetics Institute	KABJ61	65	Male	NA	NA	NA	NA	NA
Validation	Control	Medical Genetics Institute	KABJ62	46	Female	NA	NA	NA	NA	NA
Validation	Control	Medical Genetics Institute	KABJ63	46	Male	NA	NA	NA	NA	NA
Validation	Control	Medical Genetics Institute	KABJ64	52	Male	NA	NA	NA	NA	NA
Validation	Control	Medical Genetics Institute	KABJ66	32	Female	NA	NA	NA	NA	NA
Validation	Control	Medical Genetics Institute	KABJ68	59	Male	NA	NA	NA	NA	NA
Validation	Control	Medical Genetics Institute	KABJ69	57	Female	NA	NA	NA	NA	NA
Validation	Control	Medical Genetics Institute	KABJ71	33	Male	NA	NA	NA	NA	NA
Validation	Control	Medical Genetics Institute	KABJ73	50	Female	NA	NA	NA	NA	NA
Validation	Control	Medical Genetics Institute	KABJ74	61	Male	NA	NA	NA	NA	NA
Validation	Control	Medical Genetics Institute	KABJ75	39	Male	NA	NA	NA	NA	NA
Validation	Control	Medical Genetics Institute	KABJ76	55	Female	NA	NA	NA	NA	NA
Validation	Control	Medical Genetics Institute	KABJ77	38	Female	NA	NA	NA	NA	NA
Validation	Control	Medical Genetics Institute	KABJ78	23	Male	NA	NA	NA	NA	NA
Validation	Control	Medical Genetics Institute	KABJ79	38	Female	NA	NA	NA	NA	NA
Validation	Control	Medical Genetics Institute	KABJ80	64	Male	NA	NA	NA	NA	NA
Validation	Control	Medical Genetics Institute	KABJ81	51	Female	NA	NA	NA	NA	NA
Validation	Control	Medical Genetics Institute	KABJ82	67	Male	NA	NA	NA	NA	NA
Validation	Control	Medical Genetics Institute	KABJ84	61	Female	NA	NA	NA	NA	NA
Validation	Control	Medical Genetics Institute	KABJ85	62	Female	NA	NA	NA	NA	NA
Validation	Control	Medical Genetics Institute	KABJ86	58	Male	NA	NA	NA	NA	NA
Validation	Control	Medical Genetics Institute	KABJ87	43	Female	NA	NA	NA	NA	NA
Validation	Control	Medical Genetics Institute	KHAD14	38	Female	NA	NA	NA	NA	NA
Validation	Control	Medical Genetics Institute	KHAD19	30	Female	NA	NA	NA	NA	NA
Validation	Control	Medical Genetics Institute	KHAD21	37	Female	NA	NA	NA	NA	NA
Validation	Control	Medical Genetics Institute	KHAD22	27	Male	NA	NA	NA	NA	NA
Validation	Control	Medical Genetics Institute	KHAD23	48	Male	NA	NA	NA	NA	NA
Validation	Control	Medical Genetics Institute	KHAD24	31	Female	NA	NA	NA	NA	NA
Validation	Control	Medical Genetics Institute	KHAD32	58	Male	NA	NA	NA	NA	NA
Validation	Control	Medical Genetics Institute	KHAD33	41	Male	NA	NA	NA	NA	NA
Validation	Control	Medical Genetics Institute	KHAD34	51	Female	NA	NA	NA	NA	NA
Validation	Control	Medical Genetics Institute	KHAD35	50	Female	NA	NA	NA	NA	NA
Validation	Control	Medical Genetics Institute	KHAD36	56	Male	NA	NA	NA	NA	NA
Validation	Control	Medical Genetics Institute	KHAD37	37	Male	NA	NA	NA	NA	NA
Validation	Control	Medical Genetics Institute	KHAD40	28	Female	NA	NA	NA	NA	NA
Validation	Control	Medical Genetics Institute	KZAZ13	56	Male	NA	NA	NA	NA	NA
Validation	Control	Medical Genetics Institute	KZAZ14	64	Male	NA	NA	NA	NA	NA
Validation	Control	Medical Genetics Institute	KZAZ15	62	Male	NA	NA	NA	NA	NA
Validation	Control	Medical Genetics Institute	KZAZ17	52	Male	NA	NA	NA	NA	NA
Validation	Control	Medical Genetics Institute	KZAZ19	41	Female	NA	NA	NA	NA	NA
Validation	Control	Medical Genetics Institute	KZAZ20	65	Female	NA	NA	NA	NA	NA
Validation	Control	Medical Genetics Institute	KZAZ22	58	Female	NA	NA	NA	NA	NA
Validation	Control	Medical Genetics Institute	KZAZ23	40	Female	NA	NA	NA	NA	NA
Validation	Control	Medical Genetics Institute	KZAZ24	58	Male	NA	NA	NA	NA	NA
Validation	Control	Medical Genetics Institute	KZAZ25	46	Male	NA	NA	NA	NA	NA
Validation	Control	Medical Genetics Institute	KZAZ27	45	Female	NA	NA	NA	NA	NA
Validation	Control	Medical Genetics Institute	KZAZ28	48	Male	NA	NA	NA	NA	NA
Validation	Control	Medical Genetics Institute	KZAZ29	49	Female	NA	NA	NA	NA	NA
Validation	Control	Medical Genetics Institute	KZAZ30	54	Female	NA	NA	NA	NA	NA
Validation	Control	Medical Genetics Institute	KZAZ32	58	Male	NA	NA	NA	NA	NA
Validation	Control	Medical Genetics Institute	KZAZ33	51	Female	NA	NA	NA	NA	NA
Validation	Control	Medical Genetics Institute	KZAZ34	42	Female	NA	NA	NA	NA	NA
Validation	Control	Medical Genetics Institute	KZAZ35	51	Female	NA	NA	NA	NA	NA
Validation	Control	Medical Genetics Institute	KZAZ36	43	Male	NA	NA	NA	NA	NA
Validation	Control	Medical Genetics Institute	KZAZ37	40	Female	NA	NA	NA	NA	NA
Validation	Control	Medical Genetics Institute	KZAZ38	46	Female	NA	NA	NA	NA	NA
Validation	Control	Medical Genetics Institute	KZAZ39	45	Male	NA	NA	NA	NA	NA
Validation	Control	Medical Genetics Institute	KZAZ40	45	Male	NA	NA	NA	NA	NA
Validation	Control	Medical Genetics Institute	KZAZ41	55	Male	NA	NA	NA	NA	NA
Validation	Control	Medical Genetics Institute	KZAZ42	40	Male	NA	NA	NA	NA	NA
Validation	Control	Medical Genetics Institute	KZAZ43	41	Male	NA	NA	NA	NA	NA
Validation	Control	Medical Genetics Institute	KZAZ44	49	Male	NA	NA	NA	NA	NA
Validation	Control	Medical Genetics Institute	KZAZ45	51	Female	NA	NA	NA	NA	NA
Validation	Control	Medical Genetics Institute	KZAZ46	47	Male	NA	NA	NA	NA	NA
Validation	Control	Medical Genetics Institute	KZAZ47	53	Male	NA	NA	NA	NA	NA
Validation	Control	Medical Genetics Institute	KZAZ48	41	Female	NA	NA	NA	NA	NA
Validation	Control	Medical Genetics Institute	KZAZ49	45	Female	NA	NA	NA	NA	NA
Validation	Control	Medical Genetics Institute	KZAZ50	45	Female	NA	NA	NA	NA	NA
Validation	Control	Medical Genetics Institute	KZAZ51	55	Male	NA	NA	NA	NA	NA
Validation	Control	Medical Genetics Institute	KZAZ53	46	Male	NA	NA	NA	NA	NA
Validation	Control	Medical Genetics Institute	KZAZ55	50	Male	NA	NA	NA	NA	NA
Validation	Control	Medical Genetics Institute	KZAZ56	47	Male	NA	NA	NA	NA	NA
Validation	Control	Medical Genetics Institute	KZAZ57	63	Female	NA	NA	NA	NA	NA
Validation	Control	Medical Genetics Institute	KZAZ59	48	Female	NA	NA	NA	NA	NA
Validation	Control	Medical Genetics Institute	KZAZ60	44	Male	NA	NA	NA	NA	NA
Validation	Control	Medical Genetics Institute	KZAZ61	42	Male	NA	NA	NA	NA	NA
Validation	Control	Medical Genetics Institute	KZAZ62	63	Female	NA	NA	NA	NA	NA
Validation	Control	Medical Genetics Institute	KZAZ63	39	Female	NA	NA	NA	NA	NA
Validation	Control	Medical Genetics Institute	KZAZ64	59	Female	NA	NA	NA	NA	NA
Validation	Control	Medical Genetics Institute	KZAZ65	50	Female	NA	NA	NA	NA	NA
Validation	Control	Medical Genetics Institute	KZAZ66	51	Male	NA	NA	NA	NA	NA
Validation	Control	Medical Genetics Institute	KZAZ68	40	Male	NA	NA	NA	NA	NA
Validation	Control	Medical Genetics Institute	KZAZ71	41	Male	NA	NA	NA	NA	NA
Validation	Control	Medical Genetics Institute	KZAZ72	53	Female	NA	NA	NA	NA	NA
Validation	Control	Medical Genetics Institute	KZAZ73	58	Male	NA	NA	NA	NA	NA
Validation	Control	Medical Genetics Institute	KZAZ74	48	Male	NA	NA	NA	NA	NA
Validation	Control	Medical Genetics Institute	KZAZ75	42	Male	NA	NA	NA	NA	NA
Validation	Control	Medical Genetics Institute	KZAZ79	42	Female	NA	NA	NA	NA	NA
Validation	Control	Medical Genetics Institute	KZAZ80	49	Female	NA	NA	NA	NA	NA
Validation	Control	Medical Genetics Institute	KZAZ82	52	Male	NA	NA	NA	NA	NA
Validation	Control	Medical Genetics Institute	KZAZ83	48	Male	NA	NA	NA	NA	NA
Validation	Control	Medical Genetics Institute	KZAZ85	44	Male	NA	NA	NA	NA	NA
[truncated: 291 more rows]

## Sheet: Table S2
Table S2 Summary of clinical information of patients with 5 cancer types
Breast		Discovery cohort (N=156)		Validation cohort (N=67)		p-value between 2 cohorts
		N	Percentage	N	Percentage	All cancer (Discovery) vs All cancer (Validation)
Gender	Female	156	1	67	1	Chi-Square test p-value = NA
	Male	0	0	0	0
Age	Median	51		50		Mann Whitney test p-value = 0.7858
	Min	25		28
	Max	80		77
Stage	I	31	0.198718	14	0.208955	Chi-Square test p-value = 0.081687
	II	84	0.538462	31	0.462687
	IIIA	27	0.173077	8	0.119403
	Non-metastasis with unknown staging information	14	0.0897436	14	0.208955
CRC		Discovery cohort (N=106)		Validation cohort (N=53)		p-value between 2 cohorts
		N	Percentage	N	Percentage	All cancer (Discovery) vs All cancer (Validation)
Gender	Female	42	0.396226	22	0.415094	Chi-Square test p-value = 0.819104
	Male	64	0.603774	31	0.584906
Age	Median	62.5		62		Mann Whitney test p-value = 0.8462
	Min	27		30
	Max	93		82
Stage	I	11	0.103774	5	0.0943396	Chi-Square test p-value = 0.969736
	II	41	0.386792	20	0.377358
	IIIA	41	0.386792	20	0.377358
	Non-metastasis with unknown staging information	13	0.122642	8	0.150943
Gastric		Discovery cohort (N=67)		Validation cohort (N=31)		p-value between 2 cohorts
		N	Percentage	N	Percentage	All cancer (Discovery) vs All cancer (Validation)
Gender	Female	26	0.38806	12	0.387097	Chi-Square test p-value = 0.992741
	Male	41	0.61194	19	0.612903
Age	Median	62.5		61		Mann Whitney test p-value = 0.8008
	Min	36		39
	Max	97		79
Stage	I	4	0.0597015	2	0.0645161	Chi-Square test p-value = 0.988016
	II	12	0.179104	5	0.16129
	IIIA	23	0.343284	10	0.322581
	Non-metastasis with unknown staging information	28	0.41791	14	0.451613
Liver		Discovery cohort (N=77)		Validation cohort (N=45)		p-value between 2 cohorts
		N	Percentage	N	Percentage	All cancer (Discovery) vs All cancer (Validation)
Gender	Female	16	0.207792	9	0.2	Chi-Square test p-value = 0.918057
	Male	61	0.792208	36	0.8
Age	Median	58		59		Mann Whitney test p-value = 0.74
	Min	25		33
	Max	91		81
Stage	I	4	0.0519481	2	0.0444444	Chi-Square test p-value = 0.15683
	II	21	0.272727	10	0.222222
	IIIA	12	0.155844	15	0.333333
	Non-metastasis with unknown staging information	40	0.519481	18	0.4
Lung		Discovery cohort (N=93)		Validation cohort (N=43)		p-value between 2 cohorts
		N	Percentage	N	Percentage	All cancer (Discovery) vs All cancer (Validation)
Gender	Female	39	0.419355	16	0.410256	Chi-Square test p-value = 0.953963
	Male	54	0.580645	23	0.589744
Age	Median	65		64		Mann Whitney test p-value = 0.5649
	Min	33		46
	Max	92		92
Stage	I	2	0.0215054	0	0	Chi-Square test p-value = 0.65937
	II	11	0.11828	3	0.0697674
	IIIA	47	0.505376	24	0.55814
	Non-metastasis with unknown staging information	33	0.354839	16	0.372093

## Sheet: Table S3
Table S3 Summary of sequencing quality metrics of samples in both cohorts
Target fraction	Discovery	Validation
Median depth coverage (X)	52.9	51.9
Interquartile range (X)	33.7 - 75.7	33.6 - 85.1
Median sequenced reads	40526400	40890884
Percentage of mapped reads	0.811	0.793
Genome-wide fraction	Discovery	Validation
Median depth coverage (X)	0.55	0.54
Interquartile range (X)	0.44 - 0.72	0.4 - 0.68
Median sequenced reads	19638128	19048158
Percentage of mapped reads	0.636223	0.59925

## Sheet: Table S4
Table S4 List of 450 target regions Differentially methylated regions (DMRs) with p-corrected valued < 0.05 are in bold, DMRs with fold-change > 2 are highlighted
Region ID	Chrom	Start	End	Gene	p-corrected	Fold-change	Log2FC	Methylation change
1	chr1	1163599	1163832	C1orf159_TTLL10	1.51874e-09	0.974775	-0.0368592	Hypomethylation
2	chr1	2443865	2444245	PEX10_PLCH2	0.197155	1.0073	0.0105005	No change
3	chr1	2789325	2789609	ACTRT2_MMEL1	2.8166e-05	1.26438	0.338432	Hypermethylation
4	chr1	2789723	2790126	ACTRT2_MMEL1	3.02134e-07	1.30233	0.381095	Hypermethylation
5	chr1	6064999	6065249	KCNAB2_CHD5	1.60103e-07	0.987845	-0.0176438	Hypomethylation
6	chr1	7668718	7668819	VAMP3_CAMTA1	7.47027e-07	0.980249	-0.0287796	Hypomethylation
7	chr1	7668966	7668971	VAMP3_CAMTA1	2.32254e-09	0.982328	-0.0257231	Hypomethylation
8	chr1	9317873	9318231	SLC25A33_SPSB1	0.049768	1.04846	0.0682751	Hypermethylation
9	chr1	15345942	15346246	EFHD2_TMEM51	6.18287e-05	1.12682	0.172258	Hypermethylation
10	chr1	29259675	29260134	PTPRU	0.0128938	1.85954	0.894946	Hypermethylation
11	chr1	37475577	37475796	ZC3H12A_MEAF6	1.73232e-12	0.959225	-0.060059	Hypomethylation
12	chr1	43550045	43550255	KDM4A_PTPRF	0.520614	0.955824	-0.0651831	No change
13	chr1	47708297	47708484	FOXD2_TRABD2B	7.54975e-15	1.92029	0.941327	Hypermethylation
14	chr1	50416318	50416483	DMRTA2_ELAVL4	3.30296e-08	1.29877	0.377148	Hypermethylation
15	chr1	50418877	50419478	DMRTA2_ELAVL4	1.32672e-05	1.27474	0.3502	Hypermethylation
16	chr1	50419666	50419798	DMRTA2_ELAVL4	5.86241e-07	1.31734	0.397623	Hypermethylation
17	chr1	63320169	63320413	FOXD3	2.53613e-11	1.5081	0.59273	Hypermethylation
18	chr1	67559431	67559622	SERBP1_GADD45A	0.3263	0.993229	-0.0098018	No change
19	chr1	90717886	90718030	BARHL2	1.5538e-12	1.66845	0.738507	Hypermethylation
20	chr1	109792189	109792254	CSF1_EPS8L3	5.78087e-05	1.18574	0.24579	Hypermethylation
21	chr1	109792367	109792397	CSF1_EPS8L3	0.0328715	0.854971	-0.226052	Hypomethylation
22	chr1	110069838	110070192	ALX3	9.06551e-08	1.31756	0.397866	Hypermethylation
23	chr1	110083552	110083775	UBL4B_ALX3	5.72356e-14	1.60646	0.683881	Hypermethylation
24	chr1	111270865	111271077	CHIA_CHI3L2	7.37252e-12	1.41171	0.497441	Hypermethylation
25	chr1	111271216	111271381	CHIA_CHI3L2	2.49375e-05	1.1762	0.234132	Hypermethylation
26	chr1	118979744	118979926	SPAG17_TBX15	1.69369e-17	1.67033	0.740129	Hypermethylation
27	chr1	118984362	118984632	SPAG17_TBX15	4.77476e-13	2.11306	1.07933	Hypermethylation
28	chr1	118990070	118990360	TBX15	4.99194e-14	2.01627	1.01169	Hypermethylation
29	chr1	118993059	118993286	TBX15	5.01451e-12	1.47019	0.556002	Hypermethylation
31	chr1	145871997	145872290	PIAS3_ITGA10	6.71768e-17	2.80722	1.48914	Hypermethylation
32	chr1	155295211	155295696	PKLR_HCN3	0.00571396	1.15481	0.20766	Hypermethylation
33	chr1	156122596	156122849	SEMA4A_LMNA	0.918674	0.995056	-0.0071509	No change
34	chr1	156436615	156436840	C1orf61_MEF2D	9.69782e-08	1.90657	0.93098	Hypermethylation
35	chr1	156642049	156642306	BCAN	3.70686e-13	1.93349	0.951204	Hypermethylation
36	chr1	161069183	161069244	ARHGAP30	2.04973e-08	1.30391	0.382844	Hypermethylation
37	chr1	166921155	166921374	TADA1_ILDR2	3.34298e-05	1.15841	0.212151	Hypermethylation
38	chr1	220876745	220876918	HLX	9.69782e-08	1.45248	0.538521	Hypermethylation
39	chr1	220877030	220877266	HLX	1.05534e-11	1.58057	0.660445	Hypermethylation
40	chr1	237042230	237042430	RYR2	1.80932e-12	1.90844	0.93239	Hypermethylation
41	chr1	237042609	237042936	RYR2	4.04553e-14	2.33313	1.22226	Hypermethylation
42	chr1	239997847	239998011	FMN2_CHRM3	7.44226e-15	1.72408	0.785824	Hypermethylation
43	chr1	239998124	239998259	FMN2_CHRM3	7.18481e-09	1.32697	0.408132	Hypermethylation
44	chr1	247857256	247857693	TRIM58	2.15886e-15	3.07883	1.62238	Hypermethylation
45	chr10	509413	509519	DIP2C_ZMYND11	6.92333e-05	0.999137	-0.00124532	Hypomethylation
46	chr10	3472562	3472635	PITRM1_KLF6	0.159211	1.00853	0.012248	No change
47	chr10	7407762	7407965	PRKCQ_SFMBT2	1.91587e-09	1.40348	0.48901	Hypermethylation
48	chr10	7413140	7413280	SFMBT2	5.30911e-08	1.17752	0.235752	Hypermethylation
49	chr10	8052248	8052385	GATA3	6.9995e-05	1.37684	0.461361	Hypermethylation
50	chr10	23191669	23191912	PTF1A	2.95942e-06	1.2503	0.322275	Hypermethylation
51	chr10	27745381	27745577	MKX	1.19367e-08	1.50443	0.58922	Hypermethylation
52	chr10	27745715	27745928	MKX	2.08552e-09	1.70942	0.773508	Hypermethylation
53	chr10	70560556	70560867	PRF1_PALD1	0.804723	0.999843	-0.000227199	No change
54	chr10	72318365	72318398	DNAJB12_DDIT4	0.000216525	1.13473	0.182352	Hypermethylation
55	chr10	72450476	72450539	DNAJB12_MICU1	0.000651658	1.00022	0.000314813	Hypermethylation
56	chr10	92692207	92692364	EXOC6_HHEX	0.467536	1.02311	0.0329678	No change
57	chr10	93062579	93063009	CYP26A1_CYP26C1	4.63406e-09	1.63218	0.706803	Hypermethylation
58	chr10	93068345	93068620	CYP26A1_CYP26C1	6.15278e-14	1.60564	0.683152	Hypermethylation
59	chr10	97321084	97321318	FRAT1_FRAT2	2.57441e-07	1.81159	0.857255	Hypermethylation
60	chr10	101140065	101140385	TLX1_LBX1	4.98336e-08	1.42866	0.514665	Hypermethylation
61	chr10	101284337	101284644	BTRC_LBX1	6.89943e-10	1.72135	0.783544	Hypermethylation
62	chr10	107164022	107164546	SORCS1	6.16068e-06	1.24451	0.315579	Hypermethylation
63	chr10	108912398	108912568	NONE	3.30764e-07	1.26093	0.334492	Hypermethylation
64	chr10	122163615	122163857	PLEKHA1_TACC2	4.3849e-15	2.28971	1.19517	Hypermethylation
65	chr10	122164217	122164660	PLEKHA1_TACC2	1.09573e-10	1.3383	0.420402	Hypermethylation
66	chr10	123145980	123146613	HMX2	1.12963e-10	1.51294	0.597357	Hypermethylation
67	chr10	123151236	123151480	BUB3	2.09961e-06	1.69849	0.764249	Hypermethylation
68	chr10	124447401	124447594	OAT_NKX1-2	1.22367e-16	1.91636	0.938365	Hypermethylation
69	chr10	127736442	127736649	FOXI2	6.68615e-09	1.75827	0.814159	Hypermethylation
70	chr10	128934041	128934243	MKI67_MGMT	2.26434e-06	0.972511	-0.0402134	Hypomethylation
71	chr10	129415181	129415505	MGMT	0.000329882	0.987101	-0.0187304	Hypomethylation
72	chr10	129425147	129425366	MGMT	0.550652	1.00472	0.00678812	No change
73	chr10	17229289	17229505	VIM	5.64514e-16	3.96872	1.98867	Hypermethylation
74	chr10	129467252	129467332	MGMT	5.96116e-08	1.05764	0.0808426	Hypermethylation
75	chr10	91633125	91633224	PPP1R3C	1.38708e-05	1.14704	0.197914	Hypermethylation
76	chr10	86924203	86924324	BMPR1A	0.0878745	1.07626	0.106023	No change
77	chr10	17453751	17453872	ST8SIA6	6.87518e-11	1.47442	0.560151	Hypermethylation
78	chr10	17454616	17454782	ST8SIA6	1.40302e-07	1.81916	0.863274	Hypermethylation
79	chr11	280945	281044	ATHL1_NLRP6	0.211357	1.03445	0.0488689	No change
80	chr11	281278	281496	ATHL1_NLRP6	0.000573791	1.1396	0.188531	Hypermethylation
81	chr11	636846	637203	DRD4	2.36059e-08	1.38832	0.473341	Hypermethylation
82	chr11	1310494	1310628	TOLLIP	0.172207	0.987429	-0.0182517	No change
83	chr11	1310748	1310787	TOLLIP	0.0776924	1.00316	0.00455506	No change
84	chr11	1661927	1662031	KRTAP5-6_KRTAP5-5	0.708821	0.993696	-0.00912394	No change
85	chr11	31815810	31816259	PAX6_ELP4	2.9644e-07	1.57194	0.652543	Hypermethylation
86	chr11	58905378	58905576	GLYATL2_GLYATL1	4.3043e-07	1.44401	0.53008	Hypermethylation
87	chr11	61769415	61769723	MYRF_TMEM258	2.93063e-05	0.987049	-0.0188061	Hypomethylation
88	chr11	62444331	62444643	SCGB1A1_AHNAK	0.000231552	1.30161	0.380295	Hypermethylation
89	chr11	63919655	63919894	RCOR2	0.000543098	0.934399	-0.0978887	Hypomethylation
90	chr11	76322032	76322348	WNT11_PRKRIR	5.56348e-05	1.42029	0.50619	Hypermethylation
91	chr11	77039610	77039900	CAPN5_B3GNT6	3.6367e-05	1.72226	0.784306	Hypermethylation
92	chr11	94867437	94867593	AMOTL1_CWC15	0.0401306	0.994584	-0.0078351	Hypomethylation
93	chr11	125166486	125166741	PKNOX2_FEZ1	6.71768e-17	1.55209	0.634209	Hypermethylation
94	chr11	30585461	30585582	MPPED2ï¿½	4.52192e-09	2.03684	1.02633	Hypermethylation
95	chr11	131910529	131910600	OPCML	3.30535e-14	2.09027	1.06369	Hypermethylation
96	chr12	6075235	6075514	ANO2_VWF	0.00178769	1.19871	0.261478	Hypermethylation
97	chr12	6555180	6555371	IFFO1	2.64737e-13	2.76884	1.46928	Hypermethylation
98	chr12	6555638	6555744	IFFO1	1.13109e-15	4.53782	2.182	Hypermethylation
99	chr12	6555890	6556364	IFFO1	9.01652e-13	2.09296	1.06555	Hypermethylation
100	chr12	6963339	6963534	PHB2_PTPN6	0.00311785	0.998953	-0.00151197	Hypomethylation
101	chr12	24902884	24903457	BCAT1	5.30296e-13	2.50803	1.32655	Hypermethylation
102	chr12	33439383	33439602	SYT10	2.15442e-16	1.98054	0.985893	Hypermethylation
103	chr12	33439838	33440019	SYT10	1.54344e-13	1.59409	0.672731	Hypermethylation
104	chr12	54047491	54047711	HOXC4_HOXC5	3.13054e-06	1.30083	0.379435	Hypermethylation
105	chr12	57619711	57619959	SLC26A10	1.28232e-05	1.11639	0.158843	Hypermethylation
106	chr12	63150667	63151102	AVPR1A	2.52241e-07	1.54348	0.626186	Hypermethylation
107	chr12	65882147	65882322	HMGA2_ENSG00000228144	2.25939e-05	1.33669	0.418667	Hypermethylation
108	chr12	69657752	69657934	LRRC10_BEST3	0.229232	0.992172	-0.0113379	No change
109	chr12	80919125	80919187	LIN7A_MYF5	0.385563	1.01914	0.0273513	No change
110	chr12	103799993	103800029	NT5DC3_STAB2	0.784776	0.952299	-0.0705129	No change
111	chr12	103800133	103800197	NT5DC3_STAB2	0.592327	0.985784	-0.0206568	No change
112	chr12	113463473	113463622	LHX5_SDSL	3.81124e-17	2.53135	1.33991	Hypermethylation
114	chr12	113464275	113464499	LHX5_SDSL	0.000480226	1.10993	0.150472	Hypermethylation
115	chr12	113479599	113479898	LHX5_RBM19	7.61741e-07	1.36217	0.445902	Hypermethylation
116	chr12	114402994	114403528	RBM19_TBX5	6.34755e-10	1.41683	0.502662	Hypermethylation
117	chr12	114448549	114448814	TBX5_TBX3	5.41163e-07	1.37369	0.45806	Hypermethylation
118	chr12	122035274	122035558	MLXIP_BCL7A	1.24694e-05	0.988471	-0.0167301	Hypomethylation
119	chr12	124457139	124457499	NCOR2_ZNF664	5.30911e-08	1.38611	0.471046	Hypermethylation
120	chr12	131773905	131774104	MMP17_SFSWAP	0.016552	1.03113	0.0442222	Hypermethylation
121	chr12	132904700	132905056	CHFR_ZNF605	0.00281225	1.17066	0.227321	Hypermethylation
122	chr12	24949058	24949159	BCAT1	2.20132e-11	4.0029	2.00105	Hypermethylation
123	chr12	65121476	65121678	WIF1	4.56847e-11	1.58265	0.662343	Hypermethylation
124	chr13	20946079	20946274	XPO4_LATS2	5.22565e-20	2.71166	1.43918	Hypermethylation
125	chr13	24745936	24746157	RNF17_ATP12A	5.82984e-13	2.09442	1.06655	Hypermethylation
126	chr13	24746281	24746560	RNF17_ATP12A	3.23531e-08	1.53723	0.620331	Hypermethylation
127	chr13	50843351	50843551	RNASEH2B_DLEU1	2.23605e-11	1.47017	0.555985	Hypermethylation
128	chr13	52739274	52739487	LECT1	3.09285e-10	1.96184	0.972209	Hypermethylation
129	chr13	99955868	99956134	ZIC5_CLYBL	0.000146534	1.35797	0.441446	Hypermethylation
130	chr13	99997312	99997594	PCCA_ZIC2	5.73403e-12	1.40662	0.492233	Hypermethylation
131	chr13	108495649	108495841	MYO16_TNFSF13B	2.32131e-09	1.7365	0.79618	Hypermethylation
132	chr13	108495969	108496120	MYO16_TNFSF13B	6.14009e-21	2.53979	1.34471	Hypermethylation
133	chr13	110525911	110526052	RAB20_COL4A2	0.129695	0.994409	-0.00808837	No change
134	chr13	111893313	111893725	SOX1_TEX29	0.000529544	1.1039	0.142603	Hypermethylation
135	chr13	112062727	112063125	SOX1	4.7299e-07	1.36036	0.443993	Hypermethylation
136	chr13	112782153	112782378	MCF2L_ATP11A	0.00767158	0.996104	-0.00563217	Hypomethylation
137	chr13	27968877	27968960	CDX2	3.3389e-06	1.09339	0.128805	Hypermethylation
138	chr13	36346455	36346548	SPG20	1.0168e-18	2.24242	1.16506	Hypermethylation
139	chr14	20625539	20625748	RNASE12_OR6S1	7.11397e-08	1.33248	0.414115	Hypermethylation
140	chr14	54776350	54776707	GCH1_SAMD4A	2.18845e-15	1.69417	0.760583	Hypermethylation
141	chr14	56238737	56238785	TMEM260_PELI2	0.22532	1.01994	0.0284818	No change
142	chr14	56798239	56798843	OTX2_TMEM260	8.74534e-09	1.29331	0.371071	Hypermethylation
143	chr14	56809049	56809322	OTX2_TMEM260	8.48098e-08	1.32099	0.401618	Hypermethylation
144	chr14	59741061	59741184	RTN1_JKAMP	7.63233e-05	0.981471	-0.0269824	Hypomethylation
145	chr14	77025610	77025968	IRF2BPL_VASH1	2.12154e-05	0.980321	-0.028674	Hypomethylation
146	chr14	92687197	92687518	LGMN_RIN3	8.94563e-08	0.970816	-0.0427299	Hypomethylation
147	chr14	92687724	92687988	LGMN_RIN3	3.86764e-13	0.983007	-0.024726	Hypomethylation
148	chr14	93056040	93056042	ITPK1_CHGA	0.000302242	1.02344	0.0334317	Hypermethylation
149	chr14	97033237	97033740	VRK1	0.00047465	1.21927	0.286017	Hypermethylation
150	chr14	100390711	100390944	WARS_BEGAIN	0.138691	1.00927	0.0133069	No change
151	chr14	105284109	105284340	PACS2_BTBD6	0.000731728	1.19971	0.262691	Hypermethylation
152	chr14	105864223	105864329	TMEM121	0.00104555	0.951482	-0.0717521	Hypomethylation
153	chr14	93788894	93788993	PRIMA1	2.75396e-08	1.45639	0.5424	Hypermethylation
154	chr15	22964409	22964554	CYFIP1_NIPA2	5.78087e-05	1.15529	0.208251	Hypermethylation
155	chr15	29103277	29103526	NDNL2_APBA2	0.000231552	0.964782	-0.0517256	Hypomethylation
156	chr15	41495639	41496110	ITPKA_LTK	0.000783051	1.13547	0.183289	Hypermethylation
157	chr15	41501068	41501302	ITPKA_LTK	1.12464e-05	1.06395	0.0894335	Hypermethylation
158	chr15	41502802	41503053	ITPKA_LTK	0.000117465	1.33704	0.419046	Hypermethylation
159	chr15	45135110	45135284	DUOX1_SHF	8.10568e-05	1.16609	0.221682	Hypermethylation
160	chr15	52791169	52791408	ONECUT1	3.30544e-07	1.57088	0.651573	Hypermethylation
161	chr15	67822046	67822216	PIAS1_SKOR1	5.18049e-06	1.32382	0.404703	Hypermethylation
162	chr15	76347350	76347482	ISL2_SCAPER	8.98731e-07	1.29501	0.372962	Hypermethylation
163	chr16	11076366	11076546	SOCS1_CIITA	0.00658012	1.01331	0.0190782	Hypermethylation
164	chr16	11233151	11233375	SOCS1_CIITA	1.01964e-09	1.51929	0.603397	Hypermethylation
165	chr16	22814288	22814881	HS3ST2	8.20814e-11	1.3654	0.449322	Hypermethylation
166	chr16	27228988	27229194	KDM8_NSMCE1	0.0576244	1.00915	0.0131445	No change
167	chr16	51156004	51156349	SALL1	2.75839e-10	1.74101	0.799921	Hypermethylation
168	chr16	57620289	57620626	GPR56_GPR114	0.000163075	0.979827	-0.0294014	Hypomethylation
169	chr16	70737654	70737911	MTSS1L_VAC14	6.637e-19	1.5886	0.66776	Hypermethylation
170	chr16	86287871	86288212	FOXF1_IRF8	0.370337	1.01196	0.0171489	No change
171	chr16	86578761	86578992	FOXL1	1.06848e-08	1.37654	0.461046	Hypermethylation
172	chr16	86579316	86579457	FOXL1	2.53613e-11	1.6918	0.758563	Hypermethylation
173	chr16	86579589	86579743	FOXL1_FBXO31	3.94991e-06	1.26132	0.33494	Hypermethylation
174	chr16	88703445	88703727	CTU2_RNF166	1.6894e-09	1.4291	0.515112	Hypermethylation
176	chr17	27540520	27540613	LGALS9_KSR1	0.0242666	0.975717	-0.035465	Hypomethylation
177	chr17	27540719	27540727	LGALS9_KSR1	4.13263e-09	0.979013	-0.0305999	Hypomethylation
178	chr17	36808307	36808664	LHX1_MRM1	5.38708e-05	1.29786	0.376136	Hypermethylation
179	chr17	36942478	36942694	AATF_LHX1	4.5242e-13	1.61789	0.694117	Hypermethylation
180	chr17	39165372	39165565	PLXDC1_ARL5C	2.71478e-16	2.94551	1.55852	Hypermethylation
181	chr17	48544346	48544518	HOXB1_HOXB2	1.49605e-10	1.54678	0.629273	Hypermethylation
182	chr17	48544736	48544865	HOXB1_HOXB2	1.13384e-12	2.0204	1.01464	Hypermethylation
183	chr17	48754927	48755218	HOXB13_TTLL6	1.43565e-11	1.64449	0.717637	Hypermethylation
184	chr17	50469276	50469524	CHAD	3.5553e-06	1.29408	0.371927	Hypermethylation
185	chr17	57443192	57443427	MSI2_ENSG00000166329	2.73366e-05	1.26487	0.338985	Hypermethylation
186	chr17	58328520	58328675	BZRAP1	1.0405e-12	1.6325	0.707087	Hypermethylation
187	chr17	61404804	61404987	TBX4_TBX2	2.37568e-09	1.69417	0.760576	Hypermethylation
188	chr17	61451790	61451987	TBX4	5.4803e-19	2.34498	1.22958	Hypermethylation
189	chr17	61454733	61454919	TBX4	3.70686e-13	1.51653	0.600771	Hypermethylation
190	chr17	64779504	64779729	SMURF2_LRRC37A3	0.202594	1.01932	0.0276003	No change
191	chr17	75487890	75487892	CASKIN2_KIAA0195	8.1551e-11	1.5821	0.661837	Hypermethylation
192	chr17	75488000	75488110	CASKIN2_KIAA0195	6.678e-06	1.08588	0.118869	Hypermethylation
193	chr17	75640072	75640244	SMIM6_SMIM5	0.526845	0.992998	-0.0101367	No change
194	chr17	75753505	75753724	GALK1_ITGB4	9.86008e-21	1.79725	0.845795	Hypermethylation
195	chr17	77373433	77373778	TNRC6C_SEPT9	2.48398e-15	2.43299	1.28273	Hypermethylation
196	chr17	79390056	79390201	RBFOX3_ENGASE	7.75382e-08	0.977274	-0.0331645	Hypomethylation
197	chr17	79815775	79815944	CBX8_CBX4	3.31432e-12	1.45744	0.543432	Hypermethylation
198	chr17	81025756	81025942	BAIAP2_CHMP6	1.09126e-06	0.986429	-0.0197133	Hypomethylation
199	chr17	82888917	82889090	ZNF750_B3GNTL1	0.000358172	0.983154	-0.0245113	Hypomethylation
200	chr17	82889202	82889334	ZNF750_B3GNTL1	2.7067e-10	0.964977	-0.0514339	Hypomethylation
201	chr18	909016	909218	ADCYAP1	7.98174e-08	1.32968	0.41108	Hypermethylation
202	chr18	50268570	50268724	CCDC11	0.000312464	1.13373	0.181076	Hypermethylation
203	chr18	78949408	78949588	SALL3	6.87766e-07	0.982225	-0.0258751	Hypomethylation
204	chr19	641770	641986	FGF22_RNF126	0.000714249	0.980642	-0.028201	Hypomethylation
205	chr19	1210277	1210602	STK11_C19orf26	0.829285	1.00453	0.00651883	No change
206	chr19	1467885	1468077	C19orf25_APC2	6.83752e-05	1.37674	0.461255	Hypermethylation
207	chr19	3688011	3688251	CACTIN_PIP5K1C	8.484e-05	1.13909	0.187886	Hypermethylation
208	chr19	5229634	5229887	PTPRS_KDM4B	0.00274236	0.896423	-0.157749	Hypomethylation
209	chr19	10891471	10891532	CARM1_YIPF2	0.00104764	0.995462	-0.00656169	Hypomethylation
210	chr19	10891633	10891703	CARM1_YIPF2	0.0241223	0.9992	-0.0011539	Hypomethylation
211	chr19	15181568	15181821	ILVBL_NOTCH3	5.77284e-08	0.984102	-0.0231204	Hypomethylation
212	chr19	39264155	39264296	IFNL2	0.31758	1.0076	0.0109212	No change
213	chr19	41499327	41499584	CEACAM21_ATP5SL	0.00832308	0.988813	-0.0162299	Hypomethylation
214	chr19	46493754	46493966	CCDC8_PPP5D1	6.44756e-12	1.8836	0.913495	Hypermethylation
215	chr19	48735170	48735556	MAMSTR_RASIP1	9.32916e-08	0.97525	-0.0361567	Hypomethylation
216	chr19	57076511	57076538	ZIM2_USP29	6.15372e-06	0.985148	-0.0215872	Hypomethylation
217	chr2	468115	468367	FAM150B_TMEM18	4.94215e-15	2.13931	1.09715	Hypermethylation
218	chr2	1040869	1040871	TPO_SNTG2	0.309524	1.00093	0.00134799	No change
219	chr2	1040974	1041007	TPO_SNTG2	0.781141	1.01715	0.0245274	No change
220	chr2	2116598	2116856	PXDN_MYT1L	1.30089e-06	0.977504	-0.0328262	Hypomethylation
221	chr2	5692734	5692953	SOX11	1.58029e-10	1.4791	0.564723	Hypermethylation
222	chr2	10331450	10331857	HPCAL1_ODC1	0.00530281	1.17098	0.227718	Hypermethylation
223	chr2	19350218	19350866	NT5C1B-RDH14_OSR1	0.976819	1.07938	0.1102	No change
224	chr2	30230708	30230928	LBH	2.49751e-12	1.95807	0.969436	Hypermethylation
225	chr2	31580228	31580477	XDH_MEMO1	4.06363e-07	1.30601	0.385168	Hypermethylation
226	chr2	31580671	31580926	XDH_MEMO1	5.65369e-08	1.29409	0.371933	Hypermethylation
227	chr2	44801816	44802097	SIX3_CAMKMT	1.14957e-15	1.49162	0.576877	Hypermethylation
228	chr2	45000612	45000891	SIX2_SIX3	5.69998e-09	1.43277	0.518811	Hypermethylation
229	chr2	45004557	45004693	SIX2_SIX3	1.27813e-14	1.83231	0.873661	Hypermethylation
230	chr2	47043762	47043779	TTC7A_CALM2	0.548697	1.00187	0.00270118	No change
231	chr2	47043900	47043993	TTC7A_CALM2	9.30814e-08	0.987585	-0.0180229	Hypomethylation
232	chr2	66439219	66439733	ETAA1_MEIS1	5.9412e-07	1.47403	0.559763	Hypermethylation
233	chr2	68799906	68800091	ARHGAP25_BMP10	0.852856	1.00669	0.00962623	No change
234	chr2	72920275	72920885	EMX1_SFXN5	1.42147e-09	1.99644	0.997432	Hypermethylation
235	chr2	74499264	74499683	MRPL53_LBX2	2.93057e-13	1.9021	0.92759	Hypermethylation
236	chr2	85584347	85584732	VAMP5	0.046244	0.973804	-0.0382962	Hypomethylation
237	chr2	85936659	85936919	ST3GAL5_POLR1A	0.000219317	0.985892	-0.0204984	Hypomethylation
238	chr2	98823029	98823181	MGAT4A_TSGA10	5.14662e-11	1.39067	0.475779	Hypermethylation
239	chr2	104842514	104842734	POU3F3	9.68717e-11	1.56513	0.646283	Hypermethylation
240	chr2	104842858	104843001	POU3F3	9.75642e-14	1.99045	0.993096	Hypermethylation
241	chr2	104844478	104844803	POU3F3	1.44151e-07	1.40951	0.495196	Hypermethylation
242	chr2	106065435	106065782	C2orf40	2.75294e-07	1.58154	0.661334	Hypermethylation
243	chr2	113173940	113173989	PSD4	3.16829e-10	1.28261	0.359088	Hypermethylation
244	chr2	113276786	113276958	PAX8_PSD4	3.83569e-15	1.59447	0.67308	Hypermethylation
245	chr2	130963976	130964318	ARHGEF4_FAM168B	1.22234e-06	1.3509	0.433926	Hypermethylation
246	chr2	131034614	131034830	FAM168B_ARHGEF4	0.193105	1.06212	0.0869403	No change
247	chr2	161423935	161424183	SLC4A10_TBR1	1.14366e-10	1.31212	0.391898	Hypermethylation
248	chr2	165793968	165794218	GALNT3	6.87766e-07	1.34823	0.431066	Hypermethylation
249	chr2	170823080	170823362	GORASP2_GAD1	5.96894e-12	1.78032	0.832134	Hypermethylation
250	chr2	172100815	172100923	DLX2_DLX1	1.48701e-08	1.54871	0.63107	Hypermethylation
251	chr2	174337530	174337828	SP9_CIR1	2.01854e-10	1.77679	0.829275	Hypermethylation
252	chr2	176082294	176082535	KIAA1715_HOXD10	1.83173e-12	1.43874	0.524806	Hypermethylation
253	chr2	176091806	176091979	HOXD10_HOXD11_	8.99737e-07	1.64456	0.717702	Hypermethylation
254	chr2	176100105	176100308	HOXD10_HOXD11_HOXD12	4.39891e-07	1.31636	0.396552	Hypermethylation
255	chr2	176104613	176104885	HOXD10_HOXD11	4.1141e-06	1.31481	0.394852	Hypermethylation
256	chr2	176122574	176123118	HOXD9	5.9481e-10	1.37437	0.458765	Hypermethylation
257	chr2	176123335	176123515	HOXD8_HOXD9	1.36003e-06	1.39475	0.480008	Hypermethylation
258	chr2	176129999	176130335	HOXD8	2.03926e-08	1.70265	0.767781	Hypermethylation
259	chr2	176152444	176152662	HOXD1_HOXD4	2.21885e-09	1.48815	0.573521	Hypermethylation
260	chr2	176159549	176159688	HOXD1_HOXD4	7.37486e-10	1.28967	0.366999	Hypermethylation
261	chr2	197786184	197786353	BOLL	0.000141302	1.18362	0.243201	Hypermethylation
262	chr2	208406581	208406813	PTH2R	4.65048e-11	1.64349	0.71676	Hypermethylation
263	chr2	219448479	219448881	GMPPA_SPEG	5.30296e-13	1.48419	0.569671	Hypermethylation
264	chr2	222298537	222298790	PAX3	0.000107205	1.23226	0.301302	Hypermethylation
265	chr2	222298991	222299175	PAX3	2.48724e-06	1.32239	0.403148	Hypermethylation
266	chr2	233060290	233060637	INPP5D	2.92524e-05	1.26255	0.336337	Hypermethylation
267	chr2	241882165	241882427	CXXC11	0.00176618	1.09427	0.129966	Hypermethylation
268	chr2	232633618	232633707	EFHD1	2.96365e-11	1.14366	0.193655	Hypermethylation
269	chr20	4822740	4822848	RASSF2A	5.23214e-11	3.05395	1.61068	Hypermethylation
270	chr20	25081598	25081833	VSX1	5.19537e-15	1.62123	0.697088	Hypermethylation
271	chr20	40969181	40969385	MAFB_TOP1	5.23085e-05	0.781222	-0.356195	Hypomethylation
272	chr20	50010033	50010192	SNAI1_UBE2V1	0.0175512	1.04671	0.0658564	Hypermethylation
273	chr20	56627071	56627303	TFAP2C	5.14755e-09	1.31077	0.390414	Hypermethylation
274	chr20	57390020	57390254	RBM38	1.32025e-11	1.41177	0.497501	Hypermethylation
275	chr20	62603877	62604085	GATA5_SLCO4A1	2.2654e-08	1.33255	0.414191	Hypermethylation
276	chr21	36696422	36696602	SIM2	1.98641e-06	1.15464	0.207439	Hypermethylation
277	chr21	36697196	36697567	SIM2	6.18234e-17	1.97279	0.980234	Hypermethylation
278	chr21	36704462	36704653	SIM2_HLCS	2.07364e-12	2.02682	1.01922	Hypermethylation
280	chr22	19765578	19765956	TBX1_C22orf29	4.15877e-05	1.21417	0.279966	Hypermethylation
281	chr22	19767183	19767448	TBX1_C22orf29	1.97205e-09	1.40681	0.492431	Hypermethylation
282	chr22	20280279	20280448	RTN4R_DGCR6L	0.0333871	0.982852	-0.0249541	Hypomethylation
283	chr22	20438412	20438611	SCARF2	0.00404665	1.03549	0.0503114	Hypermethylation
284	chr22	21652304	21652421	PPIL2_SDF2L1	0.00031691	0.881157	-0.182529	Hypomethylation
285	chr22	26050281	26050416	SEZ6L_MYO18B	0.488585	1.00425	0.00611892	No change
286	chr22	27799853	27800150	MN1	1.47697e-09	0.957671	-0.0623984	Hypomethylation
287	chr22	46007845	46008261	PPARA_WNT7B	1.88143e-08	0.983408	-0.0241384	Hypomethylation
288	chr22	46525740	46525932	CELSR1_TRMU	0.000225281	0.98303	-0.0246922	Hypomethylation
289	chr22	50548840	50549077	TYMP_SYCE3	3.09285e-10	1.63841	0.712295	Hypermethylation
290	chr22	50577928	50578179	CPT1B	0.00682279	1.06931	0.0966765	Hypermethylation
291	chr3	9136446	9136614	RAD18_SRGAP3	5.94394e-07	1.2501	0.32204	Hypermethylation
292	chr3	52794515	52794691	ITIH3	0.0358007	0.987813	-0.0176896	Hypomethylation
293	chr3	62370444	62370697	FEZF2_PTPRG	6.56327e-09	1.51642	0.600673	Hypermethylation
294	chr3	125141549	125142116	HEG1_SLC12A8	1.28219e-10	1.67131	0.740977	Hypermethylation
295	chr3	129974607	129974728	TRH	1.0405e-12	2.15558	1.10807	Hypermethylation
296	chr3	137765024	137765316	SOX14	5.9611e-06	1.24808	0.319709	Hypermethylation
297	chr3	138939663	138939863	PIK3CB_FOXL2	1.38775e-10	1.82112	0.864823	Hypermethylation
298	chr3	138940084	138940265	PIK3CB_FOXL2	1.88384e-14	1.72402	0.785773	Hypermethylation
299	chr3	147392077	147392581	PLSCR1_ZIC4	1.91049e-14	1.61351	0.690206	Hypermethylation
300	chr3	158094327	158094687	VEPH1_SHOX2	1.76553e-16	1.30055	0.379119	Hypermethylation
301	chr3	171458160	171458353	SLC2A2_TNIK	2.5739e-05	1.31155	0.391276	Hypermethylation
302	chr3	171458454	171458456	SLC2A2_TNIK	2.1795e-06	1.31105	0.390726	Hypermethylation
303	chr3	188295081	188295168	TPRG1_LPP	0.974065	1.02593	0.03693	No change
304	chr3	192408009	192408504	FGF12	1.63851e-08	1.6283	0.703365	Hypermethylation
305	chr3	196640742	196640962	NRROS_CEP19	8.81446e-10	1.5575	0.639232	Hypermethylation
306	chr3	196660739	196660989	NRROS_CEP19	7.13604e-16	0.96127	-0.0569862	Hypomethylation
307	chr3	50340611	50340770	RASSF1A	3.46231e-08	1.62311	0.698759	Hypermethylation
308	chr4	3310274	3310386	RGS12	0.371344	1.05667	0.0795209	No change
309	chr4	8580403	8580763	GPR78	1.09483e-13	1.20707	0.271504	Hypermethylation
310	chr4	8858107	8858297	HMX1_CPZ	1.8773e-14	2.41402	1.27144	Hypermethylation
311	chr4	8861458	8861732	HMX1_CPZ	1.81018e-05	1.26197	0.335676	Hypermethylation
312	chr4	13541900	13542257	RAB28_NKX3-2	6.49079e-08	1.72792	0.789034	Hypermethylation
313	chr4	24800039	24800445	SOD3_LGI2	8.87373e-14	1.86901	0.902278	Hypermethylation
314	chr4	38671431	38671524	KLF3_TLR10	0.871156	1.0061	0.00877946	No change
315	chr4	38671667	38671669	KLF3_TLR10	0.09444	1.01211	0.0173698	No change
316	chr4	44447507	44447780	KCTD8	1.52774e-10	1.54163	0.624452	Hypermethylation
317	chr4	56655130	56655853	HOPX_ARL9	1.81018e-05	1.92959	0.948295	Hypermethylation
318	chr4	73998536	73998687	CXCL5	9.7865e-11	1.6276	0.702749	Hypermethylation
319	chr4	93834642	93834856	SMARCAD1_ATOH1	1.13384e-12	1.47795	0.563594	Hypermethylation
320	chr4	110612859	110613156	PITX2_ENPEP	7.73844e-07	1.25097	0.323048	Hypermethylation
321	chr4	139735767	139735915	MGST2_MAML3	5.99799e-18	2.05816	1.04135	Hypermethylation
322	chr4	146638834	146639336	POU4F2	6.25924e-15	1.72446	0.786142	Hypermethylation
323	chr4	153788339	153788638	SFRP2	1.78702e-10	1.59685	0.675232	Hypermethylation
324	chr4	154742893	154743115	LRAT	0.00228065	1.40456	0.490115	Hypermethylation
325	chr4	157220224	157220543	GRIA2	1.15198e-09	1.58929	0.668382	Hypermethylation
326	chr4	190019091	190019295	FRG2_FRG1	0.000866742	1.13738	0.185712	Hypermethylation
327	chr4	81031194	81031258	BMP3	8.45312e-09	1.43161	0.517635	Hypermethylation
328	chr4	153789264	153789386	SFRP2	0.00277436	1.21107	0.276283	Hypermethylation
329	chr4	83114709	83114830	PLAC8	3.57927e-08	1.28089	0.357151	Hypermethylation
330	chr4	80266629	80266758	FGF5	8.94701e-09	1.63125	0.70598	Hypermethylation
331	chr5	1876171	1876370	IRX4_NDUFS6	5.13926e-08	1.72385	0.785632	Hypermethylation
332	chr5	1877759	1878263	IRX4_NDUFS6	3.06947e-07	1.30433	0.383309	Hypermethylation
333	chr5	2149349	2149539	IRX4_IRX2	0.156984	0.981799	-0.0265001	No change
334	chr5	5140414	5140596	ADAMTS16	6.25386e-10	1.64454	0.717687	Hypermethylation
335	chr5	16179848	16180346	2023-03-11	7.75242e-14	1.48148	0.567034	Hypermethylation
336	chr5	40681066	40681252	PTGER4_PRKAA1	1.47665e-09	2.36018	1.23889	Hypermethylation
337	chr5	73298958	73299150	TMEM174_FOXD1	3.30296e-08	1.73591	0.795689	Hypermethylation
338	chr5	73419497	73419688	FOXD1_TMEM174	0.000465851	1.19563	0.257768	Hypermethylation
339	chr5	76953575	76953986	AGGF1_CRHBP	5.17519e-11	2.32214	1.21545	Hypermethylation
340	chr5	135038973	135039179	PITX1	7.7653e-14	1.46297	0.548902	Hypermethylation
341	chr5	141421294	141421524	PCDHGA11	5.49205e-12	1.52959	0.613147	Hypermethylation
342	chr5	141513254	141513476	PCDHGC5_DIAPH1	2.18845e-15	1.84209	0.881341	Hypermethylation
343	chr5	154482492	154482837	HAND1	4.14276e-06	1.42967	0.515681	Hypermethylation
344	chr5	168880138	168880349	PANK3_SLIT3	4.33742e-05	0.964482	-0.0521735	Hypomethylation
345	chr5	173245910	173246041	NKX2-5_STC2	7.98174e-08	1.74702	0.804898	Hypermethylation
346	chr5	177984393	177984830	PROP1_B4GALT7	0.000718739	1.23113	0.299989	Hypermethylation
347	chr5	178576722	178577059	PHYKPL_COL23A1	7.3796e-08	1.49226	0.577502	Hypermethylation
348	chr5	180467246	180467413	GFPT2_CNOT6	5.69998e-09	0.969475	-0.0447237	Hypomethylation
349	chr5	181059231	181059766	BTNL9_OR2V1	3.13284e-05	1.20178	0.265171	Hypermethylation
350	chr5	112737724	112737821	APC	1.84244e-13	2.34184	1.22764	Hypermethylation
351	chr5	115816763	115816878	CDO1	2.5527e-13	3.33317	1.73689	Hypermethylation
352	chr6	1378416	1378621	FOXF2_FOXQ1	1.61514e-05	1.4448	0.53087	Hypermethylation
353	chr6	6003674	6004066	NRN1_FARS2	2.27627e-08	2.026	1.01864	Hypermethylation
354	chr6	10417340	10417545	TFAP2A	1.10757e-05	1.30249	0.381272	Hypermethylation
355	chr6	10421138	10421571	GCNT2_TFAP2A	7.98977e-05	1.41667	0.502499	Hypermethylation
356	chr6	19691498	19691942	ID4	3.37054e-10	1.69836	0.764138	Hypermethylation
357	chr6	30163583	30163837	TRIM10_TRIM15	1.04616e-12	0.962046	-0.0558229	Hypomethylation
358	chr6	32189648	32189910	PBX2	0.380518	0.8504	-0.233786	No change
359	chr6	36285248	36285484	PNPLA1_ETV7	0.00019931	1.19573	0.257888	Hypermethylation
360	chr6	38715300	38715525	GLO1_DNAH8	1.70656e-07	1.66967	0.73956	Hypermethylation
361	chr6	41373668	41374013	FOXP4_NCR2	1.28437e-12	1.51698	0.601204	Hypermethylation
362	chr6	41560710	41561220	MDFI_FOXP4	1.45975e-12	1.82874	0.870854	Hypermethylation
363	chr6	42104294	42104910	GUCA1A_TAF8	4.14959e-20	2.63636	1.39855	Hypermethylation
364	chr6	50850435	50850652	TFAP2B	2.47125e-09	1.33058	0.41205	Hypermethylation
365	chr6	56851460	56851739	DST_KIAA1586	2.08552e-09	2.03079	1.02204	Hypermethylation
366	chr6	84766369	84766612	TBX18	3.84614e-07	1.20097	0.264206	Hypermethylation
367	chr6	84767295	84767566	TBX18	1.04616e-12	1.20786	0.272459	Hypermethylation
368	chr6	105986000	105986422	PREP_PRDM1	1.66097e-08	1.49249	0.577723	Hypermethylation
369	chr6	137493335	137493724	OLIG3	9.5824e-16	1.39957	0.484983	Hypermethylation
370	chr6	142913617	142913681	HIVEP2_GPR126	1.03574e-06	1.06118	0.0856631	Hypermethylation
371	chr6	142913794	142913930	HIVEP2_GPR126	0.00498073	1.02389	0.0340666	Hypermethylation
372	chr6	150683400	150683591	MTHFD1L_PLEKHG1	5.58754e-07	1.34231	0.424717	Hypermethylation
373	chr6	163396939	163397210	PARK2_QKI	5.49712e-06	1.49802	0.583057	Hypermethylation
374	chr6	170178999	170179230	DLL1_C6orf70	0.871156	0.99618	-0.00552179	No change
376	chr6	3247396	3247517	chr6:3	0.00478608	1.00001	1.20166e-05	Hypermethylation
377	chr7	351427	351579	PDGFA_FAM20C	8.16544e-12	1.6959	0.762053	Hypermethylation
378	chr7	601453	601766	PDGFA_PRKAR1B	0.000130909	1.21857	0.285185	Hypermethylation
379	chr7	1223944	1224204	ZFAND2A_UNCX	2.03294e-13	1.4584	0.544385	Hypermethylation
380	chr7	4819962	4820148	PAPOLB_AP5Z1	3.06782e-05	0.97861	-0.0311937	Hypomethylation
381	chr7	27156798	27157006	HOXA7	5.99799e-18	2.28133	1.18987	Hypermethylation
382	chr7	27166405	27166619	HOXA9	3.60294e-09	1.41455	0.500345	Hypermethylation
383	chr7	27220510	27220848	EVX1_HOXA13	2.45481e-14	2.02068	1.01484	Hypermethylation
384	chr7	27243853	27244057	EVX1_HIBADH	1.04886e-05	1.20546	0.26958	Hypermethylation
385	chr7	29563592	29563792	PRR15	0.000615054	1.05857	0.0821138	Hypermethylation
386	chr7	29566025	29566674	WIPF3_PRR15	0.0233256	1.21509	0.281062	Hypermethylation
387	chr7	35254009	35254373	TBX20	3.25818e-11	1.92989	0.948522	Hypermethylation
388	chr7	35257779	35257984	TBX20	1.03849e-13	1.99721	0.997986	Hypermethylation
389	chr7	55181179	55181395	LANCL2_EGFR	7.22914e-05	0.983728	-0.0236692	Hypomethylation
390	chr7	67551150	67551268	TYW1	1.80252e-06	0.979752	-0.0295121	Hypomethylation
391	chr7	70646560	70646772	WBSCR17	0.00220309	0.996477	-0.00509112	Hypomethylation
392	chr7	72337037	72337298	CALN1	1.70334e-18	2.79031	1.48042	Hypermethylation
393	chr7	97732129	97732323	TAC1	1.34712e-10	1.5574	0.639139	Hypermethylation
394	chr7	97732435	97732503	TAC1	7.34573e-05	1.68684	0.754325	Hypermethylation
395	chr7	122310063	122310297	FEZF1_RNF133	2.21885e-09	1.48482	0.570289	Hypermethylation
396	chr7	122310567	122310746	FEZF1_RNF133	4.85108e-12	1.53321	0.616557	Hypermethylation
397	chr7	128351787	128351958	RBM28_PRRT4	4.93913e-09	1.17236	0.229412	Hypermethylation
398	chr7	128352148	128352385	RBM28_PRRT4	7.55561e-14	1.35898	0.442519	Hypermethylation
399	chr7	150958191	150958442	KCNH2_AOC1	2.19108e-07	1.23597	0.305639	Hypermethylation
400	chr7	154617885	154618011	PAXIP1_DPP6	4.04712e-05	0.971317	-0.0419864	Hypomethylation
401	chr7	156608149	156608398	SHH_C7orf13	0.0164254	1.10731	0.147058	Hypermethylation
402	chr7	157005707	157006028	MNX1_NOM1	1.83723e-15	2.23708	1.16162	Hypermethylation
403	chr7	157018159	157018379	UBE3C_MNX1	0.00105132	1.13592	0.183859	Hypermethylation
404	chr7	157018557	157018747	UBE3C_MNX1	0.000900502	1.21193	0.277311	Hypermethylation
405	chr7	157685586	157685799	DNAJB6_PTPRN2	8.53275e-10	1.31922	0.399689	Hypermethylation
406	chr7	97731982	97732134	TAC1	1.13384e-12	1.59551	0.674017	Hypermethylation
407	chr7	27096209	27096279	HOXA1	1.169e-14	2.91866	1.54531	Hypermethylation
408	chr7	50304271	50304365	IKZF1	5.52016e-16	3.20597	1.68076	Hypermethylation
409	chr8	736980	737150	DLGAP2_TDRP	9.75642e-14	1.52713	0.610827	Hypermethylation
410	chr8	737364	737587	DLGAP2_TDRP	2.4715e-15	2.1496	1.10406	Hypermethylation
411	chr8	3691972	3692262	NONE	3.4433e-07	0.974653	-0.0370398	Hypomethylation
412	chr8	10731372	10731697	SOX7	0.00105839	1.1257	0.170826	Hypermethylation
413	chr8	20518066	20518292	LZTS1	1.02369e-08	1.05211	0.073279	Hypermethylation
414	chr8	23018512	23018762	RHOBTB2_TNFRSF10B	1.13048e-09	1.50566	0.590399	Hypermethylation
415	chr8	23706484	23706813	NKX2-6	4.43883e-15	1.83412	0.875086	Hypermethylation
416	chr8	38900207	38900594	PLEKHA2	0.000133567	1.2998	0.378285	Hypermethylation
417	chr8	54458148	54458303	SOX17	5.18863e-17	1.8913	0.919375	Hypermethylation
418	chr8	54466959	54467398	RP1_SOX17	2.08277e-10	1.64702	0.719858	Hypermethylation
419	chr8	54470079	54470317	RP1_SOX17	1.84244e-13	1.64265	0.716022	Hypermethylation
420	chr8	55989071	55989233	RPS20_LYN	2.26721e-05	0.979345	-0.0301116	Hypomethylation
421	chr8	70034655	70034888	SLCO5A1_PRDM14	1.6877e-13	1.63893	0.712752	Hypermethylation
422	chr8	70072034	70072325	PRDM14	2.64737e-13	1.87024	0.903221	Hypermethylation
423	chr8	91594959	91595159	SLC26A7_RUNX1T1	4.52171e-06	0.974513	-0.0372469	Hypomethylation
424	chr8	96159711	96159969	GDF6	1.49017e-13	1.77449	0.827404	Hypermethylation
425	chr8	98974317	98974773	VPS13B_OSR2	6.14009e-21	2.18583	1.12818	Hypermethylation
426	chr8	115667495	115667709	TRPS1	2.30372e-09	1.62104	0.696916	Hypermethylation
427	chr8	142586176	142586403	ARC_BAI1	1.13227e-09	0.980855	-0.0278885	Hypomethylation
428	chr8	144050603	144051516	OPLAH_SPATC1	0.000453585	1.49565	0.580772	Hypermethylation
429	chr8	96494022	96494170	SDC2	3.01206e-06	1.56021	0.641741	Hypermethylation
430	chr8	41308713	41308777	SFRP1	8.30983e-08	1.30857	0.387986	Hypermethylation
431	chr8	54457811	54457880	SOX17	1.07735e-09	1.5197	0.603786	Hypermethylation
432	chr8	123320561	123320682	ATAD2	0.0531993	1.0373	0.0528355	No change
433	chr8	20518007	20518128	ch8:20	0.334071	1.02406	0.0343018	No change
434	chr9	1042341	1042870	DMRT2_DMRT3	2.29469e-14	1.62025	0.696217	Hypermethylation
435	chr9	13323139	13323351	MPDZ_NFIB	0.000253497	0.99605	-0.00570927	Hypomethylation
436	chr9	14346834	14347128	NFIB_ZDHHC21	4.92376e-06	1.16529	0.220683	Hypermethylation
437	chr9	19788616	19788772	SLC24A2	3.63526e-07	1.44272	0.528787	Hypermethylation
438	chr9	19789007	19789198	SLC24A2	1.2405e-09	1.60691	0.684285	Hypermethylation
439	chr9	27690518	27690700	C9orf72_LINGO2	0.225047	0.998382	-0.00233638	No change
440	chr9	36986086	36986754	PAX5_MELK	2.44409e-05	1.32941	0.410784	Hypermethylation
441	chr9	36986901	36987144	PAX5_MELK	2.4779e-07	1.18559	0.245606	Hypermethylation
442	chr9	97853977	97854388	FOXE1	5.99599e-13	1.93091	0.94928	Hypermethylation
443	chr9	117744892	117745189	TLR4	3.88156e-06	1.38208	0.466846	Hypermethylation
444	chr9	124016065	124016323	NEK6_LHX2	4.11317e-06	1.31536	0.395462	Hypermethylation
445	chr9	124503413	124503621	NR5A1_GPR144	1.45627e-10	1.31861	0.399023	Hypermethylation
446	chr9	129888368	129888598	USP20_FNBP1	8.70738e-10	1.3796	0.464253	Hypermethylation
447	chr9	129888745	129888845	USP20_FNBP1	1.397e-13	1.67174	0.74135	Hypermethylation
448	chr9	130896111	130896371	QRFP	4.2265e-07	0.974995	-0.0365329	Hypomethylation
449	chr9	132587027	132587206	GTF3C4_BARHL1	4.23224e-05	1.32709	0.408267	Hypermethylation
450	chr9	136534110	136534227	SEC16A_NOTCH1	0.209807	1.0094	0.013493	No change
451	chr9	21974678	21974780	CDKN2A	5.28905e-06	1.1354	0.183202	Hypermethylation

## Sheet: Table S5
Table S5 List of significant pathways analyzed by g:Profiler
Source	Term_name	Term_id	adjusted_p_value	negative_log10_of_adjusted_p_value	term_size	intersections
KEGG	Signaling pathways regulating pluripotency of stem cells	KEGG:04550	2.99824e-12	11.5231	143	APC,APC2,HAND1,HOXA1,HOXB1,HOXD1,ID4,LHX5,MEIS1,ONECUT1,PAX6,PIK3CB,SMARCAD1,TBX3,WNT11,WNT7B
KEGG	Metabolic pathways	KEGG:01100	3.90291e-09	8.40861	1532	AOC1,ATP12A,B4GALT7,BCAT1,CAMKMT,CDO1,CHIA,CYP26A1,CYP26C1,GAD1,GALK1,GALNT3,GCH1,GCNT2,GFPT2,GLO1,GMPPA,HIBADH,HLCS,INPP5D,ITPK1,ITPKA,LRAT,MGAT4A,MGST2,MTHFD1L,NDUFS6,OAT,ODC1,OPLAH,PANK3,PCCA,PHYKPL,PIK3CB,PIP5K1C,PKLR,SDSL,ST3GAL5,TYMP,XDH
KEGG	Regulation of actin cytoskeleton	KEGG:04810	3.70453e-08	7.43127	227	APC,APC2,ARHGEF4,BAIAP2,CHRM3,CYFIP1,DIAPH1,EGFR,FGF22,FGF5,ITGA10,ITGB4,PDGFA,PIK3CB,PIP5K1C
KEGG	Gastric cancer	KEGG:05226	2.04366e-07	6.68959	148	APC,APC2,CDX2,EGFR,FGF22,FGF5,FRAT1,FRAT2,PIK3CB,SHH,WNT11,WNT7B
KEGG	Breast cancer	KEGG:05224	2.18267e-06	5.66101	147	APC,APC2,EGFR,FGF22,FGF5,FRAT1,FRAT2,NOTCH3,PIK3CB,WNT11,WNT7B
KEGG	Wnt signaling pathway	KEGG:04310	9.69893e-06	5.01328	170	APC,APC2,BTRC,FRAT1,FRAT2,SFRP1,SFRP2,SOX17,WIF1,WNT11,WNT7B
KEGG	Insulin resistance	KEGG:04931	1.6125e-05	4.7925	108	CPT1B,GFPT2,MLXIP,PIK3CB,PPARA,PPP1R3C,PRKAA1,PRKCQ,SLC2A2
KEGG	Pathways in cancer	KEGG:05200	2.20795e-05	4.65601	529	APC,APC2,CDKN2A,EGFR,FGF22,FGF5,FRAT1,FRAT2,MGST2,NOTCH3,PAX8,PDGFA,PIK3CB,PTGER4,RUNX1T1,SHH,WNT11,WNT7B
KEGG	Hepatocellular carcinoma	KEGG:05225	7.02463e-05	4.15338	166	APC,APC2,CDKN2A,EGFR,FRAT1,FRAT2,MGST2,PIK3CB,WNT11,WNT7B
KEGG	Maturity onset diabetes of the young	KEGG:04950	0.000133241	3.87536	26	MNX1,ONECUT1,PAX6,PKLR,SLC2A2
KEGG	Human papillomavirus infection	KEGG:05165	0.000213681	3.67023	331	APC,APC2,CHAD,EGFR,ITGA10,ITGB4,MAML3,NOTCH3,PIK3CB,PTGER4,VWF,WNT11,WNT7B
KEGG	Transcriptional misregulation in cancer	KEGG:05202	0.000261199	3.58303	192	ETV7,HMGA2,HOXA9,MEIS1,PAX3,PAX5,PAX8,PDGFA,RUNX1T1,TLX1
KEGG	PI3K-Akt signaling pathway	KEGG:04151	0.000429107	3.36743	353	CHAD,CSF1,DDIT4,EGFR,FGF22,FGF5,ITGA10,ITGB4,PDGFA,PIK3CB,PRKAA1,TLR4,VWF
KEGG	MicroRNAs in cancer	KEGG:05206	0.00059708	3.22397	310	APC,APC2,CDKN2A,DDIT4,EGFR,HMGA2,HOXD10,NOTCH3,PDGFA,PIK3CB,SOCS1,VIM
WP	Malignant pleural mesothelioma	WP:WP5087	2.54455e-12	11.5944	436	APC,BTRC,CDKN2A,CSF1,CXCL5,EGFR,FGF12,FGF22,FGF5,FRAT1,FRAT2,ITGB4,LATS2,LGALS9,MEF2D,PDGFA,PIK3CB,PRKAA1,SFRP1,SFRP2,SOX17,TNIK,WIF1,WNT11,WNT7B
WP	Neural crest differentiation	WP:WP2064	1.01033e-11	10.9955	101	FOXD3,HAND1,HOXA1,HOXB1,LHX1,LHX2,LHX5,NOTCH3,OLIG3,PAX3,SNAI1,TFAP2A,TFAP2B,ZIC5
WP	22q11.2 copy number variation syndrome	WP:WP4657	2.82839e-10	9.54846	128	CYP26A1,CYP26C1,DGCR6L,EGFR,NKX2-5,OAT,PARK2,PAX3,PITX2,RTN4R,SCARF2,SHH,TBX1,VWF
WP	Endoderm differentiation	WP:WP2853	1.29974e-09	8.88614	143	APC,ELP4,HOXA1,LHX1,ONECUT1,OTX2,PAX3,PIAS1,PRDM14,SFRP1,SOX17,SOX7,TNRC6C,ZIC5
WP	Mesodermal commitment pathway	WP:WP2857	2.98335e-09	8.5253	152	ELP4,GATA3,HAND1,HMGA2,MEIS1,PAX6,PIAS1,PITX2,SNAI1,SOX17,TBX1,TBX3,ZIC2,ZIC5
WP	Heart development	WP:WP1591	1.47878e-08	7.8301	47	HAND1,IRX4,NKX2-5,PITX2,SHH,TBX1,TBX2,TBX20,TBX5
WP	Regulation of actin cytoskeleton	WP:WP51	3.07116e-08	7.5127	149	APC,APC2,ARHGEF4,BAIAP2,CHRM3,DIAPH1,EGFR,FGF12,FGF22,FGF5,PDGFA,PIK3CB,PIP5K1C
WP	lncRNA in canonical Wnt signaling and colorectal cancer	WP:WP4258	4.50186e-08	7.34661	97	APC,APC2,FRAT1,FRAT2,SFRP1,SFRP2,SOX17,TFAP2A,WIF1,WNT11,WNT7B
WP	Pre-implantation embryo	WP:WP3527	1.25525e-07	6.90127	59	CDX2,DLX2,FOXD1,FOXQ1,GATA3,SIX3,SOX11,TBX3,TFAP2B
WP	ncRNAs involved in Wnt signaling in hepatocellular carcinoma	WP:WP4336	3.17228e-07	6.49863	89	APC,FRAT1,FRAT2,SFRP1,SFRP2,SOX17,SOX7,WIF1,WNT11,WNT7B
WP	Development of ureteric collection system	WP:WP5053	3.2957e-06	5.48205	60	CELSR1,GATA3,HOXD11,LHX1,SALL1,SHH,SIX2,WNT11
WP	Cardiac progenitor differentiation	WP:WP2406	2.70022e-05	4.5686	53	IRX4,NKX2-5,PAX6,SOX1,SOX17,TBX20,TBX5
WP	Wnt signaling	WP:WP428	4.43288e-05	4.35331	114	APC,FRAT1,FRAT2,SFRP1,SFRP2,SOX17,WIF1,WNT11,WNT7B
WP	Markers of kidney cell lineage	WP:WP5236	5.73983e-05	4.2411	59	FOXD1,LHX1,SALL1,SFRP1,SIX2,TBX18,TLX1
WP	Breast cancer pathway	WP:WP4262	6.09586e-05	4.21497	154	APC,APC2,EGFR,FGF22,FGF5,FRAT1,FRAT2,NOTCH3,WNT11,WNT7B
WP	PI3K-Akt signaling pathway	WP:WP4172	8.16965e-05	4.0878	338	CHAD,CSF1,DDIT4,EGFR,FGF12,FGF22,FGF5,ITGA10,ITGB4,PDGFA,PIK3CB,PRKAA1,TLR4,VWF
WP	GDNF/RET signaling axis	WP:WP4830	0.00012013	3.92035	23	GATA3,LHX1,SALL1,SOX11,SOX17
WP	Focal adhesion: PI3K-Akt-mTOR-signaling pathway	WP:WP3932	0.000134339	3.8718	302	CHAD,CSF1,DDIT4,EGFR,FGF12,FGF22,ITGA10,ITGB4,PDGFA,PIK3CB,PRKAA1,SLC2A2,VWF
WP	Ectoderm differentiation	WP:WP2858	0.000265737	3.57555	141	FOXL1,LHX1,MAFB,PAX3,PAX6,SHH,SORCS1,TFAP2A,TFAP2C
WP	Embryonic stem cell pluripotency pathways	WP:WP3931	0.000558933	3.25264	116	APC,EGFR,FGF12,FGF22,FGF5,PDGFA,WNT11,WNT7B
WP	Hair follicle development: cytodifferentiation - part 3 of 3	WP:WP2840	0.000814698	3.089	87	EGFR,FOXE1,FOXQ1,GATA3,LHX2,SFRP1,WIF1
WP	Kit receptor signaling pathway	WP:WP304	0.00098337	3.00728	59	INPP5D,LYN,PTPN6,SNAI1,SOCS1,TBX2

## Sheet: Table S6
Table S6 List of 256 4-mer end motifs (EM) EMs with significant difference in frequency (P<0.05) between cancer and control appear appear in bold
ID	Name	Frequency	p adjust	log2FC
1	AAAA	Increased	1.31e-07	0.0279589
2	AAAC	Increased	1.01e-06	0.0247751
3	AAAG	Increased	1.1e-13	0.0314685
4	AAAT	Increased	0.000152157	0.0209812
5	AACA	Increased	1.31e-05	0.0225076
6	AACC	No change	0.939578	-0.000381276
7	AACG	Decreased	6.02e-08	-0.0238171
8	AACT	No change	0.197336	-0.00542038
9	AAGA	Increased	2.1e-06	0.0232266
10	AAGC	Increased	0.00586966	0.00830192
11	AAGG	No change	0.921752	0.000578613
12	AAGT	No change	0.599214	0.00231152
13	AATA	No change	0.112196	0.010327
14	AATC	No change	0.873802	0.000970964
15	AATG	No change	0.267993	-0.00548473
16	AATT	No change	0.97828	-0.000140104
17	ACAA	Increased	6.64e-15	0.0486917
18	ACAC	Increased	7.35e-09	0.0310652
19	ACAG	Increased	4.08e-12	0.0301606
20	ACAT	Increased	1.21e-09	0.0375266
21	ACCA	Increased	4.02e-08	0.0240273
22	ACCC	No change	0.344977	-0.00539572
23	ACCG	Decreased	0.000475353	-0.0260151
24	ACCT	Decreased	0.000111753	-0.0162864
25	ACGA	Decreased	0.000822675	-0.0182566
26	ACGC	Decreased	0.017157	-0.0212615
27	ACGG	Decreased	3.13e-05	-0.0330839
28	ACGT	Decreased	2.08e-05	-0.0226165
29	ACTA	Increased	6.49e-05	0.0245366
30	ACTC	Increased	0.00655294	0.01259
31	ACTG	No change	0.939578	0.000497075
32	ACTT	Increased	0.0202289	0.0131462
33	AGAA	Increased	7.7e-21	0.0379363
34	AGAC	Increased	1.19e-06	0.0166095
35	AGAG	Increased	1.03e-15	0.0300929
36	AGAT	Increased	1.08e-05	0.0160587
37	AGCA	Increased	0.000233176	0.0122973
38	AGCC	Decreased	0.00712002	-0.0126121
39	AGCG	No change	0.24696	-0.0181348
40	AGCT	Decreased	2.71e-14	-0.0228146
41	AGGA	Increased	0.000114712	0.015475
42	AGGC	No change	0.920632	0.000845051
43	AGGG	No change	0.622644	0.00303356
44	AGGT	No change	0.97828	-0.000110184
45	AGTA	Increased	3.3e-06	0.0224818
46	AGTC	Increased	0.017788	0.00860823
47	AGTG	Decreased	0.0454396	-0.00839829
48	AGTT	No change	0.250294	0.00452495
49	ATAA	Increased	3.33e-11	0.0413793
50	ATAC	Increased	7.51e-10	0.0344931
51	ATAG	Increased	8.11e-18	0.045192
52	ATAT	Increased	4.77e-08	0.0323562
53	ATCA	Increased	0.0467898	0.0106019
54	ATCC	No change	0.144628	-0.00801429
55	ATCG	Decreased	9.39e-09	-0.0334679
56	ATCT	Decreased	0.000492217	-0.0151322
57	ATGA	No change	0.710058	0.00207541
58	ATGC	No change	0.20281	0.00473613
59	ATGG	Decreased	0.0441934	-0.00847674
60	ATGT	No change	0.789812	0.00124956
61	ATTA	No change	0.255873	0.00720049
62	ATTC	No change	0.957671	0.000336494
63	ATTG	Decreased	0.000587601	-0.0159152
64	ATTT	No change	0.957671	0.000363412
65	CAAA	Increased	2.73e-43	0.0815265
66	CAAC	Increased	1.75e-40	0.0621656
67	CAAG	Increased	2.14e-57	0.0722618
68	CAAT	Increased	3.06e-32	0.0690768
69	CACA	Increased	1.02e-25	0.0409803
70	CACC	No change	0.292256	-0.00524042
71	CACG	No change	0.0655271	-0.0143784
72	CACT	No change	0.587759	-0.00210608
73	CAGA	Increased	1.43e-49	0.0754583
74	CAGC	Increased	2.24e-19	0.0453041
75	CAGG	Increased	4.47e-13	0.0431762
76	CAGT	Increased	5.67e-44	0.0520007
77	CATA	Increased	3.67e-17	0.054212
78	CATC	Increased	9.02e-17	0.0343929
79	CATG	Increased	2.31e-14	0.0290896
80	CATT	Increased	1.84e-17	0.0425196
81	CCAA	Increased	6.35e-15	0.0411489
82	CCAC	No change	0.140189	0.00888124
83	CCAG	Increased	0.000601397	0.0223569
84	CCAT	Increased	0.000109837	0.0187087
85	CCCA	Decreased	1.8e-17	-0.0668765
86	CCCC	Decreased	4.76e-13	-0.0787479
87	CCCG	Decreased	1.43e-05	-0.0622459
88	CCCT	Decreased	2.11e-19	-0.106688
89	CCGA	Increased	0.00332881	0.0416913
90	CCGC	No change	0.24696	0.0222433
91	CCGG	No change	0.0640107	0.0375775
92	CCGT	No change	0.163181	-0.012331
93	CCTA	Decreased	0.000152157	-0.0227507
94	CCTC	Decreased	2.14e-06	-0.0386346
95	CCTG	Decreased	4.46e-09	-0.0439249
96	CCTT	Decreased	1.15e-11	-0.0514015
97	CGAA	Decreased	4.53e-18	-0.0874009
98	CGAC	Decreased	1.42e-15	-0.0966971
99	CGAG	Decreased	2.78e-18	-0.107619
100	CGAT	Decreased	3.82e-25	-0.11882
101	CGCA	Decreased	3.27e-24	-0.134241
102	CGCC	Decreased	1.05e-22	-0.1536
103	CGCG	Decreased	2.03e-06	-0.106498
104	CGCT	Decreased	1.53e-23	-0.155519
105	CGGA	Decreased	9.07e-10	-0.0638423
106	CGGC	Decreased	9.77e-12	-0.100315
107	CGGG	Decreased	2.42e-07	-0.0750796
108	CGGT	Decreased	1.49e-22	-0.115378
109	CGTA	Decreased	1.62e-08	-0.0577518
110	CGTC	Decreased	1.41e-16	-0.101335
111	CGTG	Decreased	1.13e-20	-0.110236
112	CGTT	Decreased	6.35e-31	-0.118852
113	CTAA	Increased	3.05e-30	0.0551137
114	CTAC	Increased	3.41e-13	0.0304644
115	CTAG	Increased	2.87e-41	0.0536726
116	CTAT	Increased	1.83e-10	0.0293763
117	CTCA	No change	0.593082	-0.00386974
118	CTCC	Decreased	0.00163322	-0.0303788
119	CTCG	Decreased	0.000874841	-0.0367594
120	CTCT	Decreased	1.4e-07	-0.0400633
121	CTGA	Increased	1.27e-14	0.0291132
122	CTGC	No change	0.891572	0.00109029
123	CTGG	Increased	0.000100024	0.0260318
124	CTGT	No change	0.0949127	-0.0066246
125	CTTA	Increased	6.61e-06	0.0211919
126	CTTC	No change	0.51559	-0.00496538
127	CTTG	No change	0.132533	-0.00706608
128	CTTT	Decreased	0.0427616	-0.0122988
129	GAAA	Increased	1.07e-05	0.0208086
130	GAAC	Increased	0.000117789	0.0153371
131	GAAG	No change	0.112196	0.00935361
132	GAAT	Increased	0.017788	0.0109743
133	GACA	Increased	0.0147444	0.0106941
134	GACC	Decreased	7.55e-15	-0.0361928
135	GACG	Decreased	2.7e-05	-0.03738
136	GACT	Decreased	2.03e-31	-0.0489077
137	GAGA	Increased	0.0126308	0.0147673
138	GAGC	No change	0.308339	-0.006088
139	GAGG	No change	0.244695	-0.00911057
140	GAGT	No change	0.357265	-0.00442892
141	GATA	Increased	0.000872393	0.0183802
142	GATC	No change	0.063608	0.00740927
143	GATG	No change	0.557196	-0.00390537
144	GATT	No change	0.551903	0.00297327
145	GCAA	No change	0.0681223	0.00975009
146	GCAC	No change	0.458561	0.00415006
147	GCAG	Decreased	0.041525	-0.0154336
148	GCAT	No change	0.95288	0.000399434
149	GCCA	Decreased	5.58e-13	-0.0393889
150	GCCC	Decreased	9.26e-24	-0.0971411
151	GCCG	Decreased	2.56e-10	-0.0834179
152	GCCT	Decreased	1.06e-35	-0.131876
153	GCGA	No change	0.424339	-0.0117099
154	GCGC	No change	0.939578	-0.00260291
155	GCGG	No change	0.107256	-0.0275089
156	GCGT	Decreased	0.00187327	-0.0304253
157	GCTA	No change	0.353764	0.00574965
158	GCTC	Decreased	0.00107725	-0.0186453
159	GCTG	Decreased	1.63e-05	-0.0351119
160	GCTT	Decreased	7.45e-14	-0.0363571
161	GGAA	Increased	0.0149843	0.0141611
162	GGAC	No change	0.92068	0.000933609
163	GGAG	No change	0.939578	0.000987061
164	GGAT	Decreased	0.017788	-0.0125875
165	GGCA	No change	0.97828	0.000182472
166	GGCC	Decreased	1.41e-16	-0.0695673
167	GGCG	No change	0.305454	-0.0171723
168	GGCT	Decreased	5.6e-32	-0.0966536
169	GGGA	No change	0.0527645	0.0138782
170	GGGC	No change	0.293437	-0.0100889
171	GGGG	No change	0.935741	0.00122405
172	GGGT	Decreased	0.0182648	-0.016965
173	GGTA	Increased	0.017788	0.0185751
174	GGTC	No change	0.941466	-0.000740388
175	GGTG	No change	0.556183	-0.00689557
176	GGTT	No change	0.24696	-0.0080272
177	GTAA	No change	0.284148	0.00611489
178	GTAC	No change	0.0982969	0.00814336
179	GTAG	No change	0.0976234	0.0101187
180	GTAT	No change	0.642152	0.00241646
181	GTCA	Decreased	0.00178845	-0.0185981
182	GTCC	Decreased	1.8e-11	-0.0490218
183	GTCG	Decreased	2.79e-10	-0.0696965
184	GTCT	Decreased	2.8e-25	-0.0646949
185	GTGA	Decreased	0.004673	-0.0190157
186	GTGC	Decreased	0.000641833	-0.0213411
187	GTGG	Decreased	0.00065542	-0.0287349
188	GTGT	Decreased	1.32e-05	-0.0236838
189	GTTA	No change	0.703711	0.00201671
190	GTTC	Decreased	0.017788	-0.0105086
191	GTTG	Decreased	4.75e-07	-0.0262186
192	GTTT	Decreased	0.000790526	-0.0144083
193	TAAA	Increased	2.8e-25	0.0640033
194	TAAC	Increased	1.18e-21	0.0527575
195	TAAG	Increased	6.11e-29	0.0586605
196	TAAT	Increased	3.21e-14	0.0457493
197	TACA	Increased	1.57e-05	0.0220209
198	TACC	Decreased	2.69e-05	-0.0232896
199	TACG	Decreased	1.48e-11	-0.0300337
200	TACT	Decreased	2.07e-08	-0.0295348
201	TAGA	Increased	9.4e-37	0.0791158
202	TAGC	Increased	1.94e-33	0.0486771
203	TAGG	Increased	1.98e-34	0.0586108
204	TAGT	Increased	7.01e-20	0.045005
205	TATA	Increased	7.14e-13	0.0516866
206	TATC	Increased	9.39e-09	0.0295895
207	TATG	Increased	1.88e-05	0.023024
208	TATT	Increased	1.32e-05	0.0243669
209	TCAA	Increased	1.05e-11	0.0256995
210	TCAC	No change	0.575975	-0.00193985
211	TCAG	No change	0.326915	0.0038654
212	TCAT	No change	0.69867	-0.00156032
213	TCCA	Decreased	2.52e-20	-0.041292
214	TCCC	Decreased	6.44e-16	-0.0498493
215	TCCG	Decreased	4.04e-19	-0.0767644
216	TCCT	Decreased	2.25e-20	-0.0593794
217	TCGA	No change	0.255873	-0.00614179
218	TCGC	Decreased	0.00100585	-0.0373776
219	TCGG	No change	0.277492	-0.011876
220	TCGT	Decreased	2.16e-07	-0.0338444
221	TCTA	Decreased	0.000451055	-0.0149163
222	TCTC	Decreased	9.19e-15	-0.0364853
223	TCTG	Decreased	6.28e-33	-0.0584631
224	TCTT	Decreased	1.7e-14	-0.0417286
225	TGAA	Decreased	2.47e-05	-0.0206629
226	TGAC	Decreased	3.52e-22	-0.0451059
227	TGAG	Decreased	4.98e-16	-0.0562646
228	TGAT	Decreased	4.58e-22	-0.0596645
229	TGCA	Decreased	7.92e-39	-0.0925693
230	TGCC	Decreased	2.06e-29	-0.107017
231	TGCG	Decreased	1.13e-23	-0.114665
232	TGCT	Decreased	8.29e-31	-0.109451
233	TGGA	No change	0.69867	-0.00224465
234	TGGC	Decreased	5e-18	-0.0603678
235	TGGG	Decreased	3.75e-05	-0.032893
236	TGGT	Decreased	1.61e-17	-0.0589009
237	TGTA	Decreased	2.09e-05	-0.0207224
238	TGTC	Decreased	6.61e-27	-0.061684
239	TGTG	Decreased	3.24e-31	-0.0832774
240	TGTT	Decreased	1.42e-29	-0.0708564
241	TTAA	Increased	2.39e-06	0.0205947
242	TTAC	Increased	0.00362944	0.0110158
243	TTAG	Increased	2.33e-10	0.0293359
244	TTAT	No change	0.20281	0.00535325
245	TTCA	Decreased	7.48e-05	-0.0163958
246	TTCC	Decreased	4.06e-05	-0.0206894
247	TTCG	Decreased	5.6e-13	-0.0401722
248	TTCT	Decreased	1.02e-08	-0.022537
249	TTGA	No change	0.219456	0.00474729
250	TTGC	Decreased	1.72e-07	-0.0194191
251	TTGG	Increased	0.00653611	0.0138404
252	TTGT	Decreased	1.01e-09	-0.0228993
253	TTTA	No change	0.97828	-0.000150177
254	TTTC	Decreased	1.13e-05	-0.0152958
255	TTTG	Decreased	1.63e-11	-0.0224801
256	TTTT	Decreased	2.51e-06	-0.0189446

## Sheet: Table S7
Table S7 Comparison of peformance between single feature-based models and stacked model
Cohort	STACK vs	AUC difference	95% Confidence Interval	Significance level (DeLong test)	Sensitivity difference	Significance level (McNemar test)
Discovery	TM	0.124	0.103 to 0.146	p < 0.0001	0.283	p < 0.0001
	GWM	0.138	0.115 to 0.160	p < 0.0001	0.129	p < 0.0001
	CNA	0.109	0.0893 to 0.128	p < 0.0001	0.223	p < 0.0001
	FLEN	0.0868	0.0699 to 0.104	p < 0.0001	0.281	p < 0.0001
	LONG	0.102	0.0826 to 0.121	p < 0.0001	0.263	p < 0.0001
	SHORT	0.221	0.194 to 0.247	p < 0.0001	0.497	p < 0.0001
	TOTAL	0.113	0.0927 to 0.133	p < 0.0001	0.271	p < 0.0001
	RATIO	0.179	0.156 to 0.203	p < 0.0001	0.449	p < 0.0001
	EM	0.0287	0.0190 to 0.0385	p < 0.0001	0.143	p < 0.0001
	CONCATENATE	0.0486	0.0354 to 0.0619	p < 0.0001	0.113	p < 0.0001
Validation	TM	0.103	0.0773 to 0.128	p < 0.0001	0.28	p < 0.0001
	GWM	0.0947	0.0681 to 0.121	p < 0.0001	0.092	p = 0.0023
	CNA	0.0781	0.0525 to 0.104	p < 0.0001	0.218	p < 0.0001
	FLEN	0.0704	0.0487 to 0.0921	p < 0.0001	0.289	p < 0.0001
	LONG	0.0997	0.0723 to 0.127	p < 0.0001	0.23	p < 0.0001
	SHORT	0.131	0.0995 to 0.163	p < 0.0001	0.448	p < 0.0001
	TOTAL	0.096	0.0697 to 0.122	p < 0.0001	0.26	p < 0.0001
	RATIO	0.137	0.107 to 0.167	p < 0.0001	0.427	p < 0.0001
	EM	0.0286	0.0151 to 0.0421	p < 0.0001	0.109	p = 0.0002
	CONCATENATE	0.0233	0.00806 to 0.0385	p = 0.0027	0.109	p < 0.0001

## Sheet: Table S8
Table S8 The sensitivity of SPOT-MAS model for detecting different cancer types and stages at a specificity of > 95%
Cancer type	Discovery
	All stage		Stage I		Stage II		Stage III		Non-metastasis with unknown stage
	n	Sensitivity (Mean, 95% CI)	n	Sensitivity (Mean, 95% CI)	n	Sensitivity (Mean, 95% CI)	n	Sensitivity (Mean, 95% CI)	n	Sensitivity (Mean, 95% CI)
Breast	156	58.33% (50.49% to 65.78%)	31	45.16% (29.16% to 62.23%)	84	63.10% (52.42% to 72.63%)	27	44.44% (27.59% to 62.69%)	14	85.71% (60.06% to 97.46%)
CRC	106	82.08% (73.69% to 88.21%)	11	81.82% (52.30% to 96.77%)	41	85.37% (71.56% to 93.12%)	41	85.37% (71.56% to 93.12%)	13	46.15% (23.21% to 70.86%)
Gastric	67	71.64% (59.91% to 81.03%)	4	50% (8.884% to 91.12%)	12	66.67% (39.06% to 86.19%)	23	95.65% (79.01% to 99.78%)	28	53.57% (35.81% to 70.47%)
Liver	77	89.61% (80.82% to 94.64%)	4	100% (51.01% to 100.0%)	21	71.43% (50.04% to 86.19%)	12	100% (75.75% to 100.0%)	40	95% (83.50% to 99.11%)
Lung	93	78.49% (69.10% to 85.62%)	2	50% (2.565% to 97.44%)	11	45.45% (21.27% to 71.99%)	47	78.72% (65.10% to 88.01%)	33	87.88% (72.67% to 95.18%)
All cancer	499	73.75% (69.72% to 77.42%)	52	61.54% (47.96% to 73.53%)	169	69.82% (62.52% to 76.24%)	150	78.67% (71.44% to 84.46%)	128	78.13% (70.20% to 84.41%)
Cancer type	Validation
	All stage		Stage I		Stage II		Stage III		Non-metastasis with unknown stage
	n	Sensitivity (Mean, 95% CI)	n	Sensitivity (Mean, 95% CI)	n	Sensitivity (Mean, 95% CI)	n	Sensitivity (Mean, 95% CI)	n	Sensitivity (Mean, 95% CI)
Breast	67	49.25% (37.65% to 60.94%)	14	57.14% (32.59% to 78.62%)	31	41.94% (26.42% to 59.23%)	8	75% (40.93% to 95.56%)	14	42.86% (21.38% to 67.41%)
CRC	53	83.02% (70.77% to 90.80%)	5	100% (56.55% to 100.0%)	20	75% (53.13% to 88.81%)	20	85% (63.96% to 94.76%)	8	87.5% (52.91% to 99.36%)
Gastric	31	61.29% (43.82% to 76.27%)	2	100% (17.77% to 100.0%)	5	100% (56.55% to 100.0%)	10	80% (49.02% to 96.45%)	14	28.57% (11.72% to 54.65%)
Liver	45	91.11% (79.27% to 96.49%)	2	100% (17.77% to 100.0%)	10	80% (49.02% to 96.45%)	15	93.33% (70.18% to 99.66%)	18	100% (82.41% to 100.0%)
Lung	43	83.71% (70.03% to 91.88%)	0	N/A	3	66.67% (11.85% to 98.29%)	24	95.83% (79.76% to 99.79%)	16	68.75% (44.40% to 85.84%)
All cancer	239	72.38% (66.40% to 77.67%)	23	73.91% (53.53% to 87.45%)	69	62.32% (50.52% to 72.82%)	77	88.31% (79.25% to 93.73%)	70	65.71% (54.04% to 75.75%)

## Sheet: Table S9
Table S9 The accurracy of RF, DNN and GCNN model for tissue of origin identification
Cancer type	Discovery
	All stage				Stage I				Stage II				Stage III				Non-metastasis with unknown stage
	n	RF	DNN	GCNN	n	RF	DNN	GCNN	n	RF	DNN	GCNN	n	RF	DNN	GCNN	n	RF	DNN	GCNN
Breast	156	0.82	0.67	0.87	29	0.93	0.79	0.96	78	0.820513	0.72	0.88	25	0.88	0.6	0.76	24	0.63	0.79	0.84
CRC	106	0.28	0.54	0.71	11	0.27	0.65	0.55	41	0.341463	0.66	0.72	41	0.27	0.44	0.71	13	0.15	0.53	0.77
Gastric	67	0.18	0.45	0.54	4	0	0.5	0.5	12	0.333333	0.75	0.58	23	0.26	0.43	0.65	28	0.07	0.5	0.43
Liver	77	0.53	0.79	0.82	4	0.75	1	1	21	0.52381	0.79	0.76	12	0.83	1	1	40	0.43	1	0.78
Lung	93	0.37	0.67	0.59	2	0.5	0.5	0.5	11	0.181818	0.45	0.37	47	0.34	0.57	0.6	33	0.45	0.5	0.67
All cancer	499	0.49	0.62	0.73	50	0.68	0.73	0.82	163	0.582822	0.7	0.77	148	0.44	0.54	0.7	138	0.37	0.7	0.7
Cancer type	Validation
	All stage				Stage I				Stage II				Stage III				Non-metastasis with unknown stage
	n	RF	DNN	GCNN	n	RF	DNN	GCNN	n	RF	DNN	GCNN	n	RF	DNN	GCNN	n	RF	DNN	GCNN
Breast	67	0.79	0.81	0.78	13	0.77	0.77	0.77	20	0.85	0.8	0.85	5	1	1	1	29	0.72	0.64	0.69
CRC	53	0.38	0.6	0.66	5	0.6	0.6	0.6	20	0.3	0.69	0.56	20	0.45	0.65	0.75	8	0.25	0.44	0.67
Gastric	31	0.19	0.41	0.55	2	1	1	1	5	0.4	0	0.8	10	0.2	0.5	0.7	14	0	0.4	0.29
Liver	45	0.62	0.77	0.76	2	1	1	1	10	0.7	1	0.9	15	0.6	0.86	0.8	18	0.56	1	0.61
Lung	43	0.44	0.74	0.63	0	N/A	N/A	N/A	3	0.33	0	0.34	24	0.42	0.79	0.67	16	0.5	0.58	0.62
All cancer	239	0.53	0.69	0.69	22	0.77	0.77	0.77	58	0.57	0.75	0.74	74	0.47	0.73	0.74	85	0.48	0.55	0.6

## Sheet: Table S10
Table S10 List of significant features for tissue of origin (TOO) identification
Cancer type	Feature type	Feature ID	Important score
Breast	TM	TMD_8	0.927541
Breast	TM	TMD_33	0.953179
Breast	TM	TMD_35	0.912034
Breast	TM	TMD_36	0.913165
Breast	TM	TMD_148	0.907969
Breast	TM	TMD_150	0.911697
Breast	TM	TMD_164	0.937406
Breast	TM	TMD_174	0.913399
Breast	TM	TMD_224	0.903384
Breast	TM	TMD_236	0.951575
Breast	TM	TMD_245	0.907615
Breast	TM	TMD_293	0.903036
Breast	TM	TMD_296	0.934244
Breast	TM	TMD_324	0.928168
Breast	TM	TMD_352	0.971579
Breast	TM	TMD_400	0.950098
Breast	TM	TMD_413	0.921774
Breast	TM	TMD_420	0.936444
Breast	GWM	GWMD_chr1_5	0.90209
Breast	GWM	GWMD_chr1_13	0.9139
Breast	GWM	GWMD_chr1_32	0.912592
Breast	GWM	GWMD_chr1_36	0.908131
Breast	GWM	GWMD_chr1_49	0.920799
Breast	GWM	GWMD_chr1_56	0.927363
Breast	GWM	GWMD_chr1_63	0.923106
Breast	GWM	GWMD_chr1_92	0.900115
Breast	GWM	GWMD_chr1_109	0.921421
Breast	GWM	GWMD_chr1_150	0.93876
Breast	GWM	GWMD_chr1_154	0.93301
Breast	GWM	GWMD_chr1_172	0.91996
Breast	GWM	GWMD_chr1_174	0.917062
Breast	GWM	GWMD_chr1_176	0.917596
Breast	GWM	GWMD_chr1_191	0.953816
Breast	GWM	GWMD_chr1_196	0.935181
Breast	GWM	GWMD_chr1_201	0.906773
Breast	GWM	GWMD_chr1_212	0.91648
Breast	GWM	GWMD_chr1_216	0.93658
Breast	GWM	GWMD_chr1_224	0.937297
Breast	GWM	GWMD_chr1_235	0.930793
Breast	GWM	GWMD_chr2_2	0.908009
Breast	GWM	GWMD_chr2_53	0.90054
Breast	GWM	GWMD_chr2_55	0.905232
Breast	GWM	GWMD_chr2_57	0.906553
Breast	GWM	GWMD_chr2_83	0.972992
Breast	GWM	GWMD_chr2_89	0.91329
Breast	GWM	GWMD_chr2_90	0.926475
Breast	GWM	GWMD_chr2_99	0.983876
Breast	GWM	GWMD_chr2_105	0.943018
Breast	GWM	GWMD_chr2_160	0.936514
Breast	GWM	GWMD_chr2_163	0.91764
Breast	GWM	GWMD_chr2_168	0.928538
Breast	GWM	GWMD_chr2_170	0.908296
Breast	GWM	GWMD_chr2_197	0.910223
Breast	GWM	GWMD_chr2_199	0.908243
Breast	GWM	GWMD_chr2_218	0.912971
Breast	GWM	GWMD_chr2_228	0.904675
Breast	GWM	GWMD_chr2_229	0.916092
Breast	GWM	GWMD_chr3_1	0.914285
Breast	GWM	GWMD_chr3_2	0.904097
Breast	GWM	GWMD_chr3_17	0.906433
Breast	GWM	GWMD_chr3_48	0.902147
Breast	GWM	GWMD_chr3_55	0.916493
Breast	GWM	GWMD_chr3_58	0.905384
Breast	GWM	GWMD_chr3_122	0.914728
Breast	GWM	GWMD_chr3_132	0.90919
Breast	GWM	GWMD_chr3_140	0.912847
Breast	GWM	GWMD_chr3_168	0.905749
Breast	GWM	GWMD_chr3_189	0.919064
Breast	GWM	GWMD_chr4_18	0.932468
Breast	GWM	GWMD_chr4_28	0.923723
Breast	GWM	GWMD_chr4_48	0.970335
Breast	GWM	GWMD_chr4_55	0.905765
Breast	GWM	GWMD_chr4_106	0.930139
Breast	GWM	GWMD_chr4_141	0.904023
Breast	GWM	GWMD_chr4_144	0.923421
Breast	GWM	GWMD_chr4_148	0.922352
Breast	GWM	GWMD_chr4_161	0.90586
Breast	GWM	GWMD_chr4_165	0.921253
Breast	GWM	GWMD_chr4_169	0.925985
Breast	GWM	GWMD_chr4_176	0.912935
Breast	GWM	GWMD_chr4_183	0.927244
Breast	GWM	GWMD_chr5_19	0.904589
Breast	GWM	GWMD_chr5_30	0.923274
Breast	GWM	GWMD_chr5_40	0.904897
Breast	GWM	GWMD_chr5_53	0.911411
Breast	GWM	GWMD_chr5_63	0.922309
Breast	GWM	GWMD_chr5_82	0.908661
Breast	GWM	GWMD_chr5_92	0.907746
Breast	GWM	GWMD_chr5_103	0.9409
Breast	GWM	GWMD_chr5_104	0.926557
Breast	GWM	GWMD_chr5_108	0.914773
Breast	GWM	GWMD_chr5_131	0.904633
Breast	GWM	GWMD_chr5_134	0.93048
Breast	GWM	GWMD_chr5_145	0.926886
Breast	GWM	GWMD_chr5_177	0.900829
Breast	GWM	GWMD_chr6_1	0.922095
Breast	GWM	GWMD_chr6_32	0.912089
Breast	GWM	GWMD_chr6_51	0.930558
Breast	GWM	GWMD_chr6_82	0.911868
Breast	GWM	GWMD_chr6_83	0.928061
Breast	GWM	GWMD_chr6_88	0.943474
Breast	GWM	GWMD_chr6_114	0.900162
Breast	GWM	GWMD_chr6_116	0.940633
Breast	GWM	GWMD_chr6_120	0.927568
Breast	GWM	GWMD_chr6_148	0.900225
Breast	GWM	GWMD_chr6_164	0.939016
Breast	GWM	GWMD_chr6_168	0.922802
Breast	GWM	GWMD_chr7_4	0.937659
Breast	GWM	GWMD_chr7_11	0.938993
Breast	GWM	GWMD_chr7_27	0.929469
Breast	GWM	GWMD_chr7_35	0.90403
Breast	GWM	GWMD_chr7_37	0.922589
Breast	GWM	GWMD_chr7_42	0.976829
Breast	GWM	GWMD_chr7_79	0.918222
Breast	GWM	GWMD_chr7_92	0.901419
Breast	GWM	GWMD_chr7_105	0.904943
Breast	GWM	GWMD_chr7_134	0.917321
Breast	GWM	GWMD_chr8_21	0.902208
Breast	GWM	GWMD_chr8_35	0.905879
Breast	GWM	GWMD_chr8_49	0.914573
Breast	GWM	GWMD_chr8_56	0.918225
Breast	GWM	GWMD_chr8_75	0.926828
Breast	GWM	GWMD_chr8_82	0.903517
Breast	GWM	GWMD_chr8_99	0.902172
Breast	GWM	GWMD_chr8_125	0.917837
Breast	GWM	GWMD_chr8_143	0.901667
Breast	GWM	GWMD_chr8_144	0.911
Breast	GWM	GWMD_chr9_11	0.941696
Breast	GWM	GWMD_chr9_29	0.939654
Breast	GWM	GWMD_chr9_38	0.908526
Breast	GWM	GWMD_chr9_44	0.919821
Breast	GWM	GWMD_chr9_46	0.932001
Breast	GWM	GWMD_chr9_80	0.957597
Breast	GWM	GWMD_chr9_94	0.939629
Breast	GWM	GWMD_chr9_96	0.938928
Breast	GWM	GWMD_chr9_113	0.90509
Breast	GWM	GWMD_chr9_115	0.94806
Breast	GWM	GWMD_chr9_121	0.92144
Breast	GWM	GWMD_chr9_126	0.913002
Breast	GWM	GWMD_chr9_139	0.946087
Breast	GWM	GWMD_chr10_13	0.911453
Breast	GWM	GWMD_chr10_16	0.931626
Breast	GWM	GWMD_chr10_25	0.918256
Breast	GWM	GWMD_chr10_62	0.941486
Breast	GWM	GWMD_chr10_68	0.900069
Breast	GWM	GWMD_chr10_97	0.957013
Breast	GWM	GWMD_chr10_100	0.967219
Breast	GWM	GWMD_chr10_105	0.906456
Breast	GWM	GWMD_chr10_109	0.920925
Breast	GWM	GWMD_chr10_120	0.981602
Breast	GWM	GWMD_chr10_129	0.910913
Breast	GWM	GWMD_chr10_134	0.916311
Breast	GWM	GWMD_chr11_11	0.921291
Breast	GWM	GWMD_chr11_16	0.942072
Breast	GWM	GWMD_chr11_37	0.921553
Breast	GWM	GWMD_chr11_41	0.904112
Breast	GWM	GWMD_chr11_61	0.933901
Breast	GWM	GWMD_chr11_65	0.931933
Breast	GWM	GWMD_chr11_67	0.932279
Breast	GWM	GWMD_chr11_71	0.928301
Breast	GWM	GWMD_chr11_72	0.916412
Breast	GWM	GWMD_chr11_103	0.902048
Breast	GWM	GWMD_chr11_115	0.914157
Breast	GWM	GWMD_chr11_117	0.933706
Breast	GWM	GWMD_chr11_129	0.910716
Breast	GWM	GWMD_chr11_133	0.900534
Breast	GWM	GWMD_chr12_12	0.952334
Breast	GWM	GWMD_chr12_43	0.902023
Breast	GWM	GWMD_chr12_55	0.910535
Breast	GWM	GWMD_chr12_64	0.912264
Breast	GWM	GWMD_chr12_86	0.938313
Breast	GWM	GWMD_chr12_88	0.900852
Breast	GWM	GWMD_chr12_95	0.911103
Breast	GWM	GWMD_chr12_133	0.93813
Breast	GWM	GWMD_chr13_20	0.905182
Breast	GWM	GWMD_chr13_50	0.96484
Breast	GWM	GWMD_chr13_54	0.943532
Breast	GWM	GWMD_chr14_22	0.927821
Breast	GWM	GWMD_chr14_64	0.920373
Breast	GWM	GWMD_chr14_78	0.900654
Breast	GWM	GWMD_chr14_87	0.917749
Breast	GWM	GWMD_chr15_23	0.96949
Breast	GWM	GWMD_chr15_27	0.916091
Breast	GWM	GWMD_chr15_87	0.9145
Breast	GWM	GWMD_chr15_103	0.908048
Breast	GWM	GWMD_chr16_34	0.947667
Breast	GWM	GWMD_chr16_35	0.932904
Breast	GWM	GWMD_chr16_48	0.909842
Breast	GWM	GWMD_chr16_69	0.907715
Breast	GWM	GWMD_chr17_17	0.906739
Breast	GWM	GWMD_chr17_28	0.901412
Breast	GWM	GWMD_chr17_29	0.938541
Breast	GWM	GWMD_chr17_39	0.947605
Breast	GWM	GWMD_chr17_47	0.920781
Breast	GWM	GWMD_chr17_50	0.916563
Breast	GWM	GWMD_chr17_51	0.900786
Breast	GWM	GWMD_chr17_64	0.947017
Breast	GWM	GWMD_chr17_73	0.915654
Breast	GWM	GWMD_chr17_79	0.936542
Breast	GWM	GWMD_chr18_11	0.952789
Breast	GWM	GWMD_chr18_19	0.921259
Breast	GWM	GWMD_chr18_21	0.905046
Breast	GWM	GWMD_chr18_22	0.92044
Breast	GWM	GWMD_chr18_28	0.926956
Breast	GWM	GWMD_chr18_35	0.951981
Breast	GWM	GWMD_chr18_46	0.910859
Breast	GWM	GWMD_chr18_52	0.918844
Breast	GWM	GWMD_chr19_6	0.918637
Breast	GWM	GWMD_chr19_7	0.92069
Breast	GWM	GWMD_chr19_11	0.951168
Breast	GWM	GWMD_chr19_37	0.909005
Breast	GWM	GWMD_chr19_49	0.912241
Breast	GWM	GWMD_chr20_7	0.921781
Breast	GWM	GWMD_chr20_16	0.936511
Breast	GWM	GWMD_chr20_17	0.915337
Breast	GWM	GWMD_chr20_47	0.91065
Breast	GWM	GWMD_chr20_61	0.904682
Breast	GWM	GWMD_chr21_29	0.910328
Breast	GWM	GWMD_chr21_43	0.926955
Breast	GWM	GWMD_chr22_20	0.918289
Breast	CNA	CNA_1:18000001-19000000	0.908819
Breast	CNA	CNA_1:21000001-22000000	0.910798
Breast	CNA	CNA_1:31000001-32000000	0.926886
Breast	CNA	CNA_1:34000001-35000000	0.906536
Breast	CNA	CNA_1:41000001-42000000	0.901378
Breast	CNA	CNA_1:69000001-70000000	0.927774
Breast	CNA	CNA_1:114000001-115000000	0.917484
Breast	CNA	CNA_1:166000001-167000000	0.900777
Breast	CNA	CNA_1:227000001-228000000	0.903268
Breast	CNA	CNA_1:244000001-245000000	0.916748
Breast	CNA	CNA_2:44000001-45000000	0.909045
Breast	CNA	CNA_2:75000001-76000000	0.90366
Breast	CNA	CNA_2:79000001-80000000	0.902684
Breast	CNA	CNA_2:102000001-103000000	0.909621
Breast	CNA	CNA_2:108000001-109000000	0.937588
Breast	CNA	CNA_2:116000001-117000000	0.90592
Breast	CNA	CNA_2:136000001-137000000	0.917244
Breast	CNA	CNA_2:149000001-150000000	0.91576
Breast	CNA	CNA_2:150000001-151000000	0.913345
Breast	CNA	CNA_2:163000001-164000000	0.904254
Breast	CNA	CNA_2:185000001-186000000	0.915453
Breast	CNA	CNA_2:191000001-192000000	0.923325
Breast	CNA	CNA_2:198000001-199000000	0.926174
Breast	CNA	CNA_2:199000001-200000000	0.946292
Breast	CNA	CNA_2:203000001-204000000	0.924807
Breast	CNA	CNA_2:208000001-209000000	0.907633
Breast	CNA	CNA_2:218000001-219000000	0.930682
Breast	CNA	CNA_2:227000001-228000000	0.910394
Breast	CNA	CNA_2:231000001-232000000	0.947153
Breast	CNA	CNA_3:2000001-3000000	0.91316
Breast	CNA	CNA_3:15000001-16000000	0.903606
Breast	CNA	CNA_3:23000001-24000000	0.902873
Breast	CNA	CNA_3:45000001-46000000	0.91719
Breast	CNA	CNA_3:55000001-56000000	0.929219
Breast	CNA	CNA_3:60000001-61000000	0.917046
Breast	CNA	CNA_3:87000001-88000000	0.920849
Breast	CNA	CNA_3:101000001-102000000	0.906976
Breast	CNA	CNA_3:124000001-125000000	0.906446
Breast	CNA	CNA_3:146000001-147000000	0.92127
Breast	CNA	CNA_3:149000001-150000000	0.903705
Breast	CNA	CNA_3:176000001-177000000	0.903008
Breast	CNA	CNA_3:186000001-187000000	0.908341
Breast	CNA	CNA_4:16000001-17000000	0.903473
Breast	CNA	CNA_4:28000001-29000000	0.909371
Breast	CNA	CNA_4:44000001-45000000	0.931159
Breast	CNA	CNA_4:74000001-75000000	0.903167
Breast	CNA	CNA_4:90000001-91000000	0.943573
Breast	CNA	CNA_4:110000001-111000000	0.923355
Breast	CNA	CNA_4:134000001-135000000	0.912681
Breast	CNA	CNA_4:152000001-153000000	0.913591
Breast	CNA	CNA_4:188000001-189000000	0.925305
Breast	CNA	CNA_5:11000001-12000000	0.953206
Breast	CNA	CNA_5:29000001-30000000	0.910702
Breast	CNA	CNA_5:31000001-32000000	0.913281
Breast	CNA	CNA_5:46000001-47000000	0.918441
Breast	CNA	CNA_5:49000001-50000000	0.934419
Breast	CNA	CNA_5:62000001-63000000	0.924708
Breast	CNA	CNA_5:68000001-69000000	0.900659
Breast	CNA	CNA_5:106000001-107000000	0.935428
Breast	CNA	CNA_5:112000001-113000000	0.904077
Breast	CNA	CNA_5:114000001-115000000	0.90676
Breast	CNA	CNA_5:127000001-128000000	0.913734
Breast	CNA	CNA_5:137000001-138000000	0.920411
Breast	CNA	CNA_5:143000001-144000000	0.904132
Breast	CNA	CNA_5:158000001-159000000	0.900236
Breast	CNA	CNA_5:172000001-173000000	0.922314
Breast	CNA	CNA_5:176000001-177000000	0.963712
Breast	CNA	CNA_6:19000001-20000000	0.942499
Breast	CNA	CNA_6:25000001-26000000	0.901409
Breast	CNA	CNA_6:38000001-39000000	0.905905
Breast	CNA	CNA_6:40000001-41000000	0.907634
Breast	CNA	CNA_6:72000001-73000000	0.926215
Breast	CNA	CNA_6:81000001-82000000	0.916509
Breast	CNA	CNA_6:88000001-89000000	0.902456
Breast	CNA	CNA_6:100000001-101000000	0.925199
Breast	CNA	CNA_6:126000001-127000000	0.934311
Breast	CNA	CNA_6:133000001-134000000	0.923948
Breast	CNA	CNA_7:3000001-4000000	0.908267
Breast	CNA	CNA_7:8000001-9000000	0.941338
Breast	CNA	CNA_7:18000001-19000000	0.929223
Breast	CNA	CNA_7:24000001-25000000	0.942735
Breast	CNA	CNA_7:78000001-79000000	0.935509
Breast	CNA	CNA_7:88000001-89000000	0.91811
Breast	CNA	CNA_7:99000001-100000000	0.918255
Breast	CNA	CNA_7:111000001-112000000	0.925809
Breast	CNA	CNA_7:151000001-152000000	0.901059
Breast	CNA	CNA_7:154000001-155000000	0.934888
Breast	CNA	CNA_7:155000001-156000000	0.931178
Breast	CNA	CNA_8:22000001-23000000	0.915906
Breast	CNA	CNA_8:32000001-33000000	0.932864
Breast	CNA	CNA_8:36000001-37000000	0.959808
Breast	CNA	CNA_8:46000001-47000000	0.911707
Breast	CNA	CNA_8:59000001-60000000	0.900295
Breast	CNA	CNA_8:65000001-66000000	0.95356
Breast	CNA	CNA_8:92000001-93000000	0.965685
Breast	CNA	CNA_8:95000001-96000000	0.907696
Breast	CNA	CNA_8:99000001-100000000	0.922904
Breast	CNA	CNA_8:115000001-116000000	0.934897
Breast	CNA	CNA_9:21000001-22000000	0.912596
Breast	CNA	CNA_9:33000001-34000000	0.929997
Breast	CNA	CNA_9:80000001-81000000	0.938734
Breast	CNA	CNA_9:105000001-106000000	0.954808
Breast	CNA	CNA_9:129000001-130000000	0.939208
Breast	CNA	CNA_9:133000001-134000000	0.930095
Breast	CNA	CNA_10:42000001-43000000	0.902626
Breast	CNA	CNA_10:45000001-46000000	0.935036
Breast	CNA	CNA_10:75000001-76000000	0.905053
Breast	CNA	CNA_10:79000001-80000000	0.912799
Breast	CNA	CNA_10:82000001-83000000	0.900006
Breast	CNA	CNA_10:93000001-94000000	0.917744
Breast	CNA	CNA_10:102000001-103000000	0.917054
Breast	CNA	CNA_10:114000001-115000000	0.902107
Breast	CNA	CNA_11:4000001-5000000	0.925655
Breast	CNA	CNA_11:12000001-13000000	0.931506
Breast	CNA	CNA_11:18000001-19000000	0.911466
Breast	CNA	CNA_11:64000001-65000000	0.930743
Breast	CNA	CNA_11:70000001-71000000	0.924151
Breast	CNA	CNA_11:81000001-82000000	0.914278
Breast	CNA	CNA_11:104000001-105000000	0.936224
Breast	CNA	CNA_11:105000001-106000000	0.949597
Breast	CNA	CNA_11:117000001-118000000	0.91239
Breast	CNA	CNA_11:118000001-119000000	0.920259
Breast	CNA	CNA_11:127000001-128000000	0.902715
Breast	CNA	CNA_11:129000001-130000000	0.944766
Breast	CNA	CNA_12:6000001-7000000	0.902297
Breast	CNA	CNA_12:24000001-25000000	0.930397
Breast	CNA	CNA_12:27000001-28000000	0.902837
Breast	CNA	CNA_12:45000001-46000000	0.924386
Breast	CNA	CNA_12:69000001-70000000	0.918942
Breast	CNA	CNA_12:81000001-82000000	0.903667
Breast	CNA	CNA_12:97000001-98000000	0.907607
Breast	CNA	CNA_12:107000001-108000000	0.937885
Breast	CNA	CNA_12:122000001-123000000	0.906494
Breast	CNA	CNA_13:19000001-20000000	0.903297
Breast	CNA	CNA_13:21000001-22000000	0.908275
Breast	CNA	CNA_13:25000001-26000000	0.905697
Breast	CNA	CNA_13:38000001-39000000	0.913284
Breast	CNA	CNA_13:44000001-45000000	0.913824
Breast	CNA	CNA_13:73000001-74000000	0.901572
Breast	CNA	CNA_13:85000001-86000000	0.93726
Breast	CNA	CNA_13:108000001-109000000	0.932632
Breast	CNA	CNA_13:109000001-110000000	0.90238
Breast	CNA	CNA_14:40000001-41000000	0.916045
Breast	CNA	CNA_14:70000001-71000000	0.93223
Breast	CNA	CNA_14:88000001-89000000	0.920276
Breast	CNA	CNA_14:96000001-97000000	0.92415
Breast	CNA	CNA_15:29000001-30000000	0.900366
Breast	CNA	CNA_15:36000001-37000000	0.914274
Breast	CNA	CNA_15:44000001-45000000	0.900019
Breast	CNA	CNA_15:61000001-62000000	0.9515
Breast	CNA	CNA_15:66000001-67000000	0.906291
Breast	CNA	CNA_15:73000001-74000000	0.923414
Breast	CNA	CNA_15:87000001-88000000	0.904095
Breast	CNA	CNA_15:91000001-92000000	0.908763
Breast	CNA	CNA_16:10000001-11000000	0.915549
Breast	CNA	CNA_16:64000001-65000000	0.928747
Breast	CNA	CNA_17:7000001-8000000	0.91318
Breast	CNA	CNA_17:10000001-11000000	0.916253
Breast	CNA	CNA_17:39000001-40000000	0.910956
Breast	CNA	CNA_17:46000001-47000000	0.910873
Breast	CNA	CNA_17:57000001-58000000	0.903071
Breast	CNA	CNA_18:18000001-19000000	0.906889
Breast	CNA	CNA_18:26000001-27000000	0.941857
Breast	CNA	CNA_18:30000001-31000000	0.916485
Breast	CNA	CNA_18:31000001-32000000	0.90818
Breast	CNA	CNA_18:57000001-58000000	0.903823
Breast	CNA	CNA_18:72000001-73000000	0.919146
Breast	CNA	CNA_18:75000001-76000000	0.902379
Breast	CNA	CNA_19:4000001-5000000	0.909612
Breast	CNA	CNA_19:6000001-7000000	0.910426
Breast	CNA	CNA_19:24000001-25000000	0.90534
Breast	CNA	CNA_19:38000001-39000000	0.903371
Breast	CNA	CNA_19:46000001-47000000	0.909355
Breast	CNA	CNA_20:14000001-15000000	0.906192
Breast	CNA	CNA_20:21000001-22000000	0.938781
Breast	CNA	CNA_20:35000001-36000000	0.916975
Breast	CNA	CNA_20:55000001-56000000	0.916727
Breast	CNA	CNA_20:56000001-57000000	0.923043
Breast	CNA	CNA_21:25000001-26000000	0.928375
Breast	CNA	CNA_21:42000001-43000000	0.902747
Breast	CNA	CNA_22:35000001-36000000	0.912477
Breast	CNA	CNA_22:40000001-41000000	0.936918
Breast	CNA	CNA_22:46000001-47000000	0.907584
Breast	FLEN	flen_149	0.905932
Breast	FLEN	flen_155	0.902813
Breast	FLEN	flen_156	0.923264
Breast	FLEN	flen_157	0.901965
Breast	FLEN	flen_177	0.92364
Breast	SHORT	GWFP_short_1:235000001-240000000	0.902823
Breast	SHORT	GWFP_short_4:1-5000000	0.919203
Breast	SHORT	GWFP_short_4:130000001-135000000	0.903752
Breast	SHORT	GWFP_short_4:135000001-140000000	0.94523
Breast	SHORT	GWFP_short_4:150000001-155000000	0.953217
Breast	SHORT	GWFP_short_5:130000001-135000000	0.923364
Breast	SHORT	GWFP_short_9:50000001-55000000	0.926202
Breast	SHORT	GWFP_short_9:80000001-85000000	0.922625
Breast	SHORT	GWFP_short_10:25000001-30000000	0.903856
Breast	SHORT	GWFP_short_11:50000001-55000000	0.918161
Breast	SHORT	GWFP_short_13:115000001-115169878	0.917014
Breast	SHORT	GWFP_short_14:10000001-15000000	0.903851
Breast	SHORT	GWFP_short_17:70000001-75000000	0.91799
Breast	LONG	GWFP_long_2:1-5000000	0.907637
Breast	LONG	GWFP_long_5:110000001-115000000	0.904929
Breast	LONG	GWFP_long_6:105000001-110000000	0.911157
Breast	LONG	GWFP_long_6:130000001-135000000	0.907344
Breast	LONG	GWFP_long_6:165000001-170000000	0.916801
Breast	LONG	GWFP_long_7:100000001-105000000	0.931087
Breast	LONG	GWFP_long_7:155000001-159138663	0.953686
Breast	LONG	GWFP_long_9:50000001-55000000	0.915166
Breast	LONG	GWFP_long_11:5000001-10000000	0.902671
Breast	LONG	GWFP_long_12:15000001-20000000	0.90709
Breast	LONG	GWFP_long_12:45000001-50000000	0.948413
Breast	LONG	GWFP_long_12:100000001-105000000	0.940328
Breast	LONG	GWFP_long_12:115000001-120000000	0.91215
Breast	LONG	GWFP_long_13:1-5000000	0.931833
Breast	LONG	GWFP_long_13:95000001-100000000	0.908371
Breast	LONG	GWFP_long_14:55000001-60000000	0.911027
Breast	LONG	GWFP_long_18:5000001-10000000	0.916014
Breast	LONG	GWFP_long_19:1-5000000	0.913769
Breast	LONG	GWFP_long_19:30000001-35000000	0.914036
Breast	TOTAL	GWFP_total_1:115000001-120000000	0.905936
Breast	TOTAL	GWFP_total_1:240000001-245000000	0.903001
Breast	TOTAL	GWFP_total_2:135000001-140000000	0.931954
Breast	TOTAL	GWFP_total_4:25000001-30000000	0.901042
Breast	TOTAL	GWFP_total_4:180000001-185000000	0.908013
Breast	TOTAL	GWFP_total_6:5000001-10000000	0.920251
Breast	TOTAL	GWFP_total_7:25000001-30000000	0.921405
Breast	TOTAL	GWFP_total_7:115000001-120000000	0.903464
Breast	TOTAL	GWFP_total_10:5000001-10000000	0.908288
Breast	TOTAL	GWFP_total_11:15000001-20000000	0.947951
Breast	TOTAL	GWFP_total_13:110000001-115000000	0.969047
Breast	TOTAL	GWFP_total_18:20000001-25000000	0.92702
Breast	TOTAL	GWFP_total_22:5000001-10000000	0.926407
Breast	RATIO	GWFP_ratio_1:65000001-70000000	0.946841
Breast	RATIO	GWFP_ratio_1:85000001-90000000	0.906129
Breast	RATIO	GWFP_ratio_1:145000001-150000000	0.922127
Breast	RATIO	GWFP_ratio_1:235000001-240000000	0.968515
Breast	RATIO	GWFP_ratio_2:30000001-35000000	0.914558
Breast	RATIO	GWFP_ratio_2:40000001-45000000	0.926093
Breast	RATIO	GWFP_ratio_2:45000001-50000000	0.903601
Breast	RATIO	GWFP_ratio_2:140000001-145000000	0.938386
Breast	RATIO	GWFP_ratio_2:145000001-150000000	0.905887
Breast	RATIO	GWFP_ratio_2:235000001-240000000	0.920399
Breast	RATIO	GWFP_ratio_3:150000001-155000000	0.932836
Breast	RATIO	GWFP_ratio_4:45000001-50000000	0.915104
Breast	RATIO	GWFP_ratio_5:30000001-35000000	0.906063
Breast	RATIO	GWFP_ratio_6:105000001-110000000	0.906731
Breast	RATIO	GWFP_ratio_6:145000001-150000000	0.904731
Breast	RATIO	GWFP_ratio_7:60000001-65000000	0.914228
Breast	RATIO	GWFP_ratio_7:65000001-70000000	0.906385
Breast	RATIO	GWFP_ratio_7:95000001-100000000	0.911079
Breast	RATIO	GWFP_ratio_9:130000001-135000000	0.905025
Breast	RATIO	GWFP_ratio_9:135000001-140000000	0.910353
Breast	RATIO	GWFP_ratio_10:50000001-55000000	0.908371
Breast	RATIO	GWFP_ratio_10:100000001-105000000	0.924401
Breast	RATIO	GWFP_ratio_12:105000001-110000000	0.906601
Breast	RATIO	GWFP_ratio_12:110000001-115000000	0.923689
Breast	RATIO	GWFP_ratio_13:40000001-45000000	0.947643
Breast	RATIO	GWFP_ratio_13:45000001-50000000	0.901192
Breast	RATIO	GWFP_ratio_14:15000001-20000000	0.935745
Breast	RATIO	GWFP_ratio_14:90000001-95000000	0.91656
Breast	RATIO	GWFP_ratio_14:100000001-105000000	0.914972
Breast	RATIO	GWFP_ratio_15:1-5000000	0.930888
Breast	RATIO	GWFP_ratio_15:5000001-10000000	0.905419
Breast	RATIO	GWFP_ratio_15:65000001-70000000	0.939342
Breast	RATIO	GWFP_ratio_15:80000001-85000000	0.938259
Breast	RATIO	GWFP_ratio_15:100000001-102531392	0.903529
Breast	RATIO	GWFP_ratio_17:1-5000000	0.92511
Breast	RATIO	GWFP_ratio_18:50000001-55000000	0.908061
Breast	RATIO	GWFP_ratio_19:20000001-25000000	0.912511
Breast	RATIO	GWFP_ratio_20:55000001-60000000	0.905194
Breast	RATIO	GWFP_ratio_21:5000001-10000000	0.906785
Breast	RATIO	GWFP_ratio_21:20000001-25000000	0.913099
Breast	RATIO	GWFP_ratio_22:15000001-20000000	0.935329
Breast	RATIO	GWFP_ratio_22:25000001-30000000	0.919726
Breast	RATIO	GWFP_ratio_22:45000001-50000000	0.906706
Breast	EM	MOTIF_END_AAAC	0.905932
Breast	EM	MOTIF_END_AACT	0.902813
Breast	EM	MOTIF_END_AAGA	0.923264
Breast	EM	MOTIF_END_CACA	0.901965
Breast	EM	MOTIF_END_CACG	0.92364
Breast	EM	MOTIF_END_CTGG	0.904665
CRC	TM	TMD_25	0.900956
CRC	TM	TMD_159	0.90791
CRC	TM	TMD_208	0.908302
CRC	TM	TMD_213	0.911346
CRC	TM	TMD_230	0.903123
CRC	TM	TMD_371	0.922771
CRC	TM	TMD_390	0.938477
CRC	GWM	GWMD_chr1_45	0.903348
CRC	GWM	GWMD_chr1_54	0.901351
CRC	GWM	GWMD_chr1_67	0.919014
CRC	GWM	GWMD_chr1_76	0.902806
CRC	GWM	GWMD_chr1_77	0.93193
CRC	GWM	GWMD_chr1_101	0.908524
CRC	GWM	GWMD_chr1_122	0.900418
CRC	GWM	GWMD_chr1_150	0.931866
CRC	GWM	GWMD_chr1_172	0.908798
CRC	GWM	GWMD_chr1_188	0.917549
CRC	GWM	GWMD_chr1_204	0.908541
CRC	GWM	GWMD_chr1_206	0.900806
CRC	GWM	GWMD_chr1_226	0.911593
CRC	GWM	GWMD_chr1_238	0.923215
CRC	GWM	GWMD_chr2_14	0.914045
CRC	GWM	GWMD_chr2_15	0.913398
CRC	GWM	GWMD_chr2_29	0.931063
CRC	GWM	GWMD_chr2_35	0.922381
CRC	GWM	GWMD_chr2_76	0.923548
CRC	GWM	GWMD_chr2_83	0.915536
CRC	GWM	GWMD_chr2_108	0.905816
CRC	GWM	GWMD_chr2_111	0.900505
CRC	GWM	GWMD_chr2_118	0.903374
CRC	GWM	GWMD_chr2_162	0.91421
CRC	GWM	GWMD_chr2_164	0.930815
CRC	GWM	GWMD_chr2_172	0.938218
CRC	GWM	GWMD_chr2_181	0.916619
CRC	GWM	GWMD_chr2_207	0.932506
CRC	GWM	GWMD_chr2_214	0.928918
CRC	GWM	GWMD_chr2_219	0.961412
CRC	GWM	GWMD_chr2_226	0.92675
CRC	GWM	GWMD_chr3_16	0.926392
CRC	GWM	GWMD_chr3_25	0.934525
CRC	GWM	GWMD_chr3_35	0.900723
CRC	GWM	GWMD_chr3_55	0.914541
CRC	GWM	GWMD_chr3_71	0.917924
CRC	GWM	GWMD_chr3_79	0.922625
CRC	GWM	GWMD_chr3_84	0.900895
CRC	GWM	GWMD_chr3_118	0.909284
CRC	GWM	GWMD_chr3_139	0.9145
CRC	GWM	GWMD_chr3_170	0.904512
CRC	GWM	GWMD_chr3_186	0.971485
CRC	GWM	GWMD_chr4_17	0.901573
CRC	GWM	GWMD_chr4_20	0.907613
CRC	GWM	GWMD_chr4_44	0.92204
CRC	GWM	GWMD_chr4_47	0.910052
CRC	GWM	GWMD_chr4_57	0.947904
CRC	GWM	GWMD_chr4_61	0.9329
CRC	GWM	GWMD_chr4_73	0.91395
CRC	GWM	GWMD_chr4_110	0.901991
CRC	GWM	GWMD_chr4_132	0.916535
CRC	GWM	GWMD_chr4_140	0.904864
CRC	GWM	GWMD_chr4_152	0.914056
CRC	GWM	GWMD_chr4_154	0.905756
CRC	GWM	GWMD_chr4_160	0.971843
CRC	GWM	GWMD_chr4_174	0.923743
CRC	GWM	GWMD_chr5_20	0.925362
CRC	GWM	GWMD_chr5_51	0.919085
CRC	GWM	GWMD_chr5_54	0.913099
CRC	GWM	GWMD_chr5_76	0.913495
CRC	GWM	GWMD_chr5_110	0.968264
CRC	GWM	GWMD_chr5_123	0.934561
CRC	GWM	GWMD_chr5_128	0.900484
CRC	GWM	GWMD_chr5_137	0.949081
CRC	GWM	GWMD_chr5_175	0.934001
CRC	GWM	GWMD_chr6_54	0.905199
CRC	GWM	GWMD_chr6_68	0.900278
CRC	GWM	GWMD_chr6_127	0.90773
CRC	GWM	GWMD_chr6_128	0.90779
CRC	GWM	GWMD_chr6_166	0.918152
CRC	GWM	GWMD_chr7_23	0.918591
CRC	GWM	GWMD_chr7_59	0.911509
CRC	GWM	GWMD_chr7_115	0.952367
CRC	GWM	GWMD_chr8_28	0.903462
CRC	GWM	GWMD_chr8_54	0.901214
CRC	GWM	GWMD_chr8_62	0.952934
CRC	GWM	GWMD_chr8_71	0.953596
CRC	GWM	GWMD_chr8_101	0.901081
CRC	GWM	GWMD_chr8_121	0.902731
CRC	GWM	GWMD_chr8_135	0.925046
CRC	GWM	GWMD_chr8_142	0.908529
CRC	GWM	GWMD_chr8_144	0.906674
CRC	GWM	GWMD_chr9_22	0.911431
CRC	GWM	GWMD_chr9_74	0.90359
CRC	GWM	GWMD_chr9_88	0.920831
CRC	GWM	GWMD_chr9_102	0.917291
CRC	GWM	GWMD_chr9_107	0.908493
CRC	GWM	GWMD_chr10_8	0.932661
CRC	GWM	GWMD_chr10_33	0.930815
CRC	GWM	GWMD_chr10_49	0.931371
CRC	GWM	GWMD_chr10_59	0.929873
CRC	GWM	GWMD_chr10_62	0.930225
CRC	GWM	GWMD_chr10_66	0.946925
CRC	GWM	GWMD_chr10_97	0.910718
CRC	GWM	GWMD_chr10_129	0.902085
CRC	GWM	GWMD_chr11_18	0.903882
CRC	GWM	GWMD_chr11_24	0.911746
CRC	GWM	GWMD_chr11_31	0.901729
CRC	GWM	GWMD_chr11_83	0.900645
CRC	GWM	GWMD_chr11_85	0.901256
CRC	GWM	GWMD_chr11_88	0.923031
CRC	GWM	GWMD_chr11_93	0.904165
CRC	GWM	GWMD_chr11_124	0.915892
CRC	GWM	GWMD_chr11_134	0.90598
CRC	GWM	GWMD_chr12_6	0.912897
CRC	GWM	GWMD_chr12_11	0.947214
CRC	GWM	GWMD_chr12_12	0.927117
CRC	GWM	GWMD_chr12_44	0.923043
CRC	GWM	GWMD_chr12_53	0.923332
CRC	GWM	GWMD_chr12_57	0.93261
CRC	GWM	GWMD_chr12_67	0.900645
CRC	GWM	GWMD_chr12_71	0.901306
CRC	GWM	GWMD_chr12_74	0.936552
CRC	GWM	GWMD_chr12_77	0.91246
CRC	GWM	GWMD_chr12_84	0.906072
CRC	GWM	GWMD_chr12_104	0.924922
CRC	GWM	GWMD_chr12_124	0.92839
CRC	GWM	GWMD_chr12_130	0.967421
CRC	GWM	GWMD_chr13_48	0.921389
CRC	GWM	GWMD_chr13_55	0.904345
CRC	GWM	GWMD_chr13_74	0.901497
CRC	GWM	GWMD_chr13_76	0.919741
CRC	GWM	GWMD_chr13_83	0.920071
CRC	GWM	GWMD_chr13_98	0.912682
CRC	GWM	GWMD_chr13_99	0.955457
CRC	GWM	GWMD_chr13_104	0.909247
CRC	GWM	GWMD_chr14_41	0.917053
CRC	GWM	GWMD_chr14_63	0.921247
CRC	GWM	GWMD_chr14_66	0.945462
CRC	GWM	GWMD_chr14_92	0.951534
CRC	GWM	GWMD_chr14_100	0.903858
CRC	GWM	GWMD_chr15_42	0.900552
CRC	GWM	GWMD_chr16_5	0.910654
CRC	GWM	GWMD_chr16_8	0.917377
CRC	GWM	GWMD_chr16_28	0.935149
CRC	GWM	GWMD_chr16_50	0.92032
CRC	GWM	GWMD_chr16_63	0.910732
CRC	GWM	GWMD_chr16_77	0.951868
CRC	GWM	GWMD_chr16_83	0.910282
CRC	GWM	GWMD_chr17_7	0.90027
CRC	GWM	GWMD_chr17_9	0.935671
CRC	GWM	GWMD_chr18_12	0.910318
CRC	GWM	GWMD_chr18_78	0.901139
CRC	GWM	GWMD_chr19_8	0.916089
CRC	GWM	GWMD_chr19_31	0.911975
CRC	GWM	GWMD_chr19_39	0.912086
CRC	GWM	GWMD_chr21_24	0.901068
CRC	GWM	GWMD_chr21_39	0.927836
CRC	GWM	GWMD_chr22_49	0.931224
CRC	CNA	CNA_1:15000001-16000000	0.903809
CRC	CNA	CNA_1:17000001-18000000	0.928669
CRC	CNA	CNA_1:28000001-29000000	0.906224
CRC	CNA	CNA_1:33000001-34000000	0.913299
CRC	CNA	CNA_1:65000001-66000000	0.942224
CRC	CNA	CNA_1:99000001-100000000	0.911071
CRC	CNA	CNA_1:100000001-101000000	0.907936
CRC	CNA	CNA_1:164000001-165000000	0.915556
CRC	CNA	CNA_1:200000001-201000000	0.901131
CRC	CNA	CNA_1:203000001-204000000	0.924893
CRC	CNA	CNA_1:242000001-243000000	0.920351
CRC	CNA	CNA_1:245000001-246000000	0.909068
CRC	CNA	CNA_2:1-1000000	0.904218
CRC	CNA	CNA_2:3000001-4000000	0.903235
CRC	CNA	CNA_2:9000001-10000000	0.927649
CRC	CNA	CNA_2:21000001-22000000	0.902017
CRC	CNA	CNA_2:86000001-87000000	0.915256
CRC	CNA	CNA_2:120000001-121000000	0.926438
CRC	CNA	CNA_2:159000001-160000000	0.931179
CRC	CNA	CNA_2:173000001-174000000	0.909621
CRC	CNA	CNA_2:174000001-175000000	0.902379
CRC	CNA	CNA_2:199000001-200000000	0.911535
CRC	CNA	CNA_2:201000001-202000000	0.916239
CRC	CNA	CNA_2:237000001-238000000	0.90567
CRC	CNA	CNA_3:1-1000000	0.907196
CRC	CNA	CNA_3:15000001-16000000	0.902314
CRC	CNA	CNA_3:72000001-73000000	0.901545
CRC	CNA	CNA_3:129000001-130000000	0.917173
CRC	CNA	CNA_3:150000001-151000000	0.920632
CRC	CNA	CNA_3:152000001-153000000	0.915401
CRC	CNA	CNA_3:196000001-197000000	0.954904
CRC	CNA	CNA_4:35000001-36000000	0.933072
CRC	CNA	CNA_4:48000001-49000000	0.928433
CRC	CNA	CNA_4:61000001-62000000	0.940472
CRC	CNA	CNA_4:71000001-72000000	0.902103
CRC	CNA	CNA_4:171000001-172000000	0.906306
CRC	CNA	CNA_4:172000001-173000000	0.929744
CRC	CNA	CNA_4:178000001-179000000	0.903452
CRC	CNA	CNA_4:184000001-185000000	0.926371
CRC	CNA	CNA_5:22000001-23000000	0.912699
CRC	CNA	CNA_5:23000001-24000000	0.901609
CRC	CNA	CNA_5:49000001-50000000	0.911856
CRC	CNA	CNA_5:70000001-71000000	0.978908
CRC	CNA	CNA_5:110000001-111000000	0.921062
CRC	CNA	CNA_5:121000001-122000000	0.912152
CRC	CNA	CNA_5:125000001-126000000	0.909966
CRC	CNA	CNA_5:141000001-142000000	0.928093
CRC	CNA	CNA_5:148000001-149000000	0.906178
CRC	CNA	CNA_6:8000001-9000000	0.912008
CRC	CNA	CNA_6:71000001-72000000	0.96469
CRC	CNA	CNA_6:88000001-89000000	0.924948
CRC	CNA	CNA_6:95000001-96000000	0.93808
CRC	CNA	CNA_6:96000001-97000000	0.942168
CRC	CNA	CNA_6:105000001-106000000	0.901556
CRC	CNA	CNA_6:107000001-108000000	0.940457
CRC	CNA	CNA_6:152000001-153000000	0.901667
CRC	CNA	CNA_6:155000001-156000000	0.906819
CRC	CNA	CNA_7:7000001-8000000	0.926481
CRC	CNA	CNA_7:34000001-35000000	0.93594
CRC	CNA	CNA_7:38000001-39000000	0.908529
CRC	CNA	CNA_7:81000001-82000000	0.932756
CRC	CNA	CNA_7:82000001-83000000	0.903114
CRC	CNA	CNA_7:111000001-112000000	0.907603
CRC	CNA	CNA_7:147000001-148000000	0.912647
CRC	CNA	CNA_8:21000001-22000000	0.944019
CRC	CNA	CNA_8:28000001-29000000	0.932174
CRC	CNA	CNA_8:69000001-70000000	0.965123
CRC	CNA	CNA_8:82000001-83000000	0.928316
CRC	CNA	CNA_8:105000001-106000000	0.907205
CRC	CNA	CNA_8:116000001-117000000	0.915869
CRC	CNA	CNA_8:135000001-136000000	0.906042
CRC	CNA	CNA_9:8000001-9000000	0.900227
CRC	CNA	CNA_9:133000001-134000000	0.92775
CRC	CNA	CNA_10:1-1000000	0.939405
CRC	CNA	CNA_10:23000001-24000000	0.90953
CRC	CNA	CNA_10:50000001-51000000	0.910012
CRC	CNA	CNA_10:119000001-120000000	0.949434
CRC	CNA	CNA_10:128000001-129000000	0.902855
CRC	CNA	CNA_11:1-1000000	0.944566
CRC	CNA	CNA_11:10000001-11000000	0.918221
CRC	CNA	CNA_11:32000001-33000000	0.924341
CRC	CNA	CNA_11:33000001-34000000	0.920275
CRC	CNA	CNA_11:49000001-50000000	0.900926
CRC	CNA	CNA_11:99000001-100000000	0.942278
CRC	CNA	CNA_11:119000001-120000000	0.920925
CRC	CNA	CNA_11:126000001-127000000	0.901096
CRC	CNA	CNA_12:5000001-6000000	0.904535
CRC	CNA	CNA_12:12000001-13000000	0.940843
CRC	CNA	CNA_12:32000001-33000000	0.913143
CRC	CNA	CNA_12:63000001-64000000	0.933489
CRC	CNA	CNA_12:88000001-89000000	0.939865
CRC	CNA	CNA_12:96000001-97000000	0.913506
CRC	CNA	CNA_12:131000001-132000000	0.959233
CRC	CNA	CNA_13:38000001-39000000	0.911077
CRC	CNA	CNA_13:42000001-43000000	0.919995
CRC	CNA	CNA_13:78000001-79000000	0.932831
CRC	CNA	CNA_13:105000001-106000000	0.928458
CRC	CNA	CNA_14:29000001-30000000	0.926403
CRC	CNA	CNA_14:48000001-49000000	0.91975
CRC	CNA	CNA_14:49000001-50000000	0.946701
CRC	CNA	CNA_14:71000001-72000000	0.924109
CRC	CNA	CNA_14:75000001-76000000	0.925867
CRC	CNA	CNA_14:79000001-80000000	0.913906
CRC	CNA	CNA_14:85000001-86000000	0.916914
CRC	CNA	CNA_15:29000001-30000000	0.940064
CRC	CNA	CNA_15:47000001-48000000	0.917887
CRC	CNA	CNA_15:64000001-65000000	0.912858
CRC	CNA	CNA_15:76000001-77000000	0.929532
CRC	CNA	CNA_15:91000001-92000000	0.908025
CRC	CNA	CNA_15:92000001-93000000	0.9199
CRC	CNA	CNA_16:21000001-22000000	0.920176
CRC	CNA	CNA_16:64000001-65000000	0.94463
CRC	CNA	CNA_17:53000001-54000000	0.919025
CRC	CNA	CNA_17:77000001-78000000	0.927287
CRC	CNA	CNA_18:11000001-12000000	0.918965
CRC	CNA	CNA_18:21000001-22000000	0.927393
CRC	CNA	CNA_18:24000001-25000000	0.916976
CRC	CNA	CNA_18:28000001-29000000	0.905579
CRC	CNA	CNA_18:73000001-74000000	0.902992
CRC	CNA	CNA_18:75000001-76000000	0.919862
CRC	CNA	CNA_19:3000001-4000000	0.957209
CRC	CNA	CNA_19:59000001-59128983	0.915263
CRC	CNA	CNA_20:4000001-5000000	0.925408
CRC	CNA	CNA_20:36000001-37000000	0.916161
CRC	CNA	CNA_21:27000001-28000000	0.91165
CRC	CNA	CNA_21:33000001-34000000	0.931043
CRC	CNA	CNA_21:38000001-39000000	0.918973
CRC	CNA	CNA_21:44000001-45000000	0.951911
CRC	CNA	CNA_22:29000001-30000000	0.91407
CRC	CNA	CNA_22:37000001-38000000	0.901442
CRC	CNA	CNA_22:47000001-48000000	0.903464
CRC	FLEN	flen_145	0.972137
CRC	FLEN	flen_152	0.908647
CRC	FLEN	flen_167	0.911916
CRC	FLEN	flen_189	0.907467
CRC	SHORT	GWFP_short_1:35000001-40000000	0.910005
CRC	SHORT	GWFP_short_1:105000001-110000000	0.903009
CRC	SHORT	GWFP_short_1:150000001-155000000	0.905699
CRC	SHORT	GWFP_short_3:65000001-70000000	0.93356
CRC	SHORT	GWFP_short_3:185000001-190000000	0.917298
CRC	SHORT	GWFP_short_6:35000001-40000000	0.906059
CRC	SHORT	GWFP_short_6:155000001-160000000	0.936253
CRC	SHORT	GWFP_short_14:5000001-10000000	0.921706
CRC	SHORT	GWFP_short_14:30000001-35000000	0.93016
CRC	SHORT	GWFP_short_15:30000001-35000000	0.908351
CRC	SHORT	GWFP_short_15:40000001-45000000	0.956596
CRC	SHORT	GWFP_short_16:20000001-25000000	0.917757
CRC	SHORT	GWFP_short_18:40000001-45000000	0.918693
CRC	SHORT	GWFP_short_19:50000001-55000000	0.910299
CRC	LONG	GWFP_long_1:10000001-15000000	0.906233
CRC	LONG	GWFP_long_1:125000001-130000000	0.909194
CRC	LONG	GWFP_long_1:190000001-195000000	0.925739
CRC	LONG	GWFP_long_1:235000001-240000000	0.93767
CRC	LONG	GWFP_long_2:200000001-205000000	0.9072
CRC	LONG	GWFP_long_3:55000001-60000000	0.909647
CRC	LONG	GWFP_long_3:100000001-105000000	0.931285
CRC	LONG	GWFP_long_3:145000001-150000000	0.918378
CRC	LONG	GWFP_long_3:180000001-185000000	0.901831
CRC	LONG	GWFP_long_4:150000001-155000000	0.904701
CRC	LONG	GWFP_long_4:180000001-185000000	0.911215
CRC	LONG	GWFP_long_7:65000001-70000000	0.901335
CRC	LONG	GWFP_long_9:60000001-65000000	0.904224
CRC	LONG	GWFP_long_10:75000001-80000000	0.900125
CRC	LONG	GWFP_long_10:100000001-105000000	0.905679
CRC	LONG	GWFP_long_10:110000001-115000000	0.925204
CRC	LONG	GWFP_long_15:70000001-75000000	0.952645
CRC	LONG	GWFP_long_16:90000001-90354753	0.947276
CRC	LONG	GWFP_long_17:5000001-10000000	0.904482
CRC	LONG	GWFP_long_17:75000001-80000000	0.903507
CRC	LONG	GWFP_long_18:5000001-10000000	0.912644
CRC	LONG	GWFP_long_19:50000001-55000000	0.954828
CRC	TOTAL	GWFP_total_1:20000001-25000000	0.911677
CRC	TOTAL	GWFP_total_1:135000001-140000000	0.942191
CRC	TOTAL	GWFP_total_2:215000001-220000000	0.915338
CRC	TOTAL	GWFP_total_2:230000001-235000000	1
CRC	TOTAL	GWFP_total_5:130000001-135000000	0.942923
CRC	TOTAL	GWFP_total_6:35000001-40000000	0.945027
CRC	TOTAL	GWFP_total_6:145000001-150000000	0.927364
CRC	TOTAL	GWFP_total_6:150000001-155000000	0.900342
CRC	TOTAL	GWFP_total_7:25000001-30000000	0.911362
CRC	TOTAL	GWFP_total_9:55000001-60000000	0.930184
CRC	TOTAL	GWFP_total_10:125000001-130000000	0.906647
CRC	TOTAL	GWFP_total_11:45000001-50000000	0.908853
CRC	TOTAL	GWFP_total_11:115000001-120000000	0.917164
CRC	TOTAL	GWFP_total_14:55000001-60000000	0.905302
CRC	TOTAL	GWFP_total_15:35000001-40000000	0.940954
CRC	TOTAL	GWFP_total_15:85000001-90000000	0.917168
CRC	TOTAL	GWFP_total_16:55000001-60000000	0.912421
CRC	TOTAL	GWFP_total_18:15000001-20000000	0.924233
CRC	TOTAL	GWFP_total_18:70000001-75000000	0.928366
CRC	TOTAL	GWFP_total_20:25000001-30000000	0.904495
CRC	TOTAL	GWFP_total_21:10000001-15000000	0.900298
CRC	TOTAL	GWFP_total_22:10000001-15000000	0.914605
CRC	TOTAL	GWFP_total_22:35000001-40000000	0.93771
CRC	RATIO	GWFP_ratio_8:140000001-145000000	0.923564
CRC	RATIO	GWFP_ratio_8:145000001-146364022	0.930497
CRC	RATIO	GWFP_ratio_10:115000001-120000000	0.907376
CRC	RATIO	GWFP_ratio_11:30000001-35000000	0.900633
CRC	RATIO	GWFP_ratio_11:80000001-85000000	0.913221
CRC	RATIO	GWFP_ratio_12:65000001-70000000	0.916623
CRC	RATIO	GWFP_ratio_12:105000001-110000000	0.915539
CRC	RATIO	GWFP_ratio_12:125000001-130000000	0.935798
CRC	RATIO	GWFP_ratio_13:35000001-40000000	0.904726
CRC	RATIO	GWFP_ratio_17:65000001-70000000	0.916267
CRC	RATIO	GWFP_ratio_21:35000001-40000000	0.90885
CRC	EM	MOTIF_END_AAAA	0.972137
CRC	EM	MOTIF_END_AAAT	0.908647
CRC	EM	MOTIF_END_AGGA	0.911916
CRC	EM	MOTIF_END_CAGC	0.907467
CRC	EM	MOTIF_END_CGTG	0.918722
CRC	EM	MOTIF_END_TATT	0.9197
Gastric	TM	TMD_17	0.914188
Gastric	TM	TMD_179	0.917843
Gastric	TM	TMD_283	0.904001
Gastric	TM	TMD_359	0.901128
Gastric	GWM	GWMD_chr1_26	0.904637
Gastric	GWM	GWMD_chr1_82	0.920287
Gastric	GWM	GWMD_chr1_111	0.911986
Gastric	GWM	GWMD_chr1_113	0.9116
Gastric	GWM	GWMD_chr1_207	0.901179
Gastric	GWM	GWMD_chr1_238	0.906363
Gastric	GWM	GWMD_chr2_51	0.911615
Gastric	GWM	GWMD_chr2_73	0.901077
Gastric	GWM	GWMD_chr2_176	0.901705
Gastric	GWM	GWMD_chr2_210	0.93955
Gastric	GWM	GWMD_chr2_241	0.914934
Gastric	GWM	GWMD_chr3_63	0.903615
Gastric	GWM	GWMD_chr4_151	0.901378
Gastric	GWM	GWMD_chr4_192	0.934055
Gastric	GWM	GWMD_chr5_15	0.90126
Gastric	GWM	GWMD_chr5_55	0.938111
Gastric	GWM	GWMD_chr5_139	0.919086
Gastric	GWM	GWMD_chr5_169	0.902263
Gastric	GWM	GWMD_chr5_170	0.928524
Gastric	GWM	GWMD_chr6_46	0.90164
Gastric	GWM	GWMD_chr6_149	0.912994
Gastric	GWM	GWMD_chr8_2	0.946096
Gastric	GWM	GWMD_chr9_5	0.916992
Gastric	GWM	GWMD_chr9_44	0.90567
Gastric	GWM	GWMD_chr9_83	0.910781
Gastric	GWM	GWMD_chr9_88	0.915449
Gastric	GWM	GWMD_chr10_10	0.909724
Gastric	GWM	GWMD_chr10_113	0.922852
Gastric	GWM	GWMD_chr10_120	0.907403
Gastric	GWM	GWMD_chr10_134	0.901494
Gastric	GWM	GWMD_chr11_51	0.973682
Gastric	GWM	GWMD_chr11_64	0.907729
Gastric	GWM	GWMD_chr12_13	0.920324
Gastric	GWM	GWMD_chr12_30	0.913743
Gastric	GWM	GWMD_chr12_58	0.917965
Gastric	GWM	GWMD_chr12_81	0.921182
Gastric	GWM	GWMD_chr13_96	0.94392
Gastric	GWM	GWMD_chr15_37	0.926523
Gastric	GWM	GWMD_chr16_15	0.9009
Gastric	GWM	GWMD_chr16_28	0.922159
Gastric	GWM	GWMD_chr16_90	0.907488
Gastric	GWM	GWMD_chr17_18	0.902462
Gastric	GWM	GWMD_chr17_67	0.906564
Gastric	GWM	GWMD_chr17_79	0.902014
Gastric	GWM	GWMD_chr18_24	0.907836
Gastric	GWM	GWMD_chr19_37	0.919762
Gastric	GWM	GWMD_chr20_10	0.909397
Gastric	CNA	CNA_1:116000001-117000000	0.975554
Gastric	CNA	CNA_1:158000001-159000000	0.906381
Gastric	CNA	CNA_2:50000001-51000000	0.900805
Gastric	CNA	CNA_2:73000001-74000000	0.909516
Gastric	CNA	CNA_2:116000001-117000000	0.98538
Gastric	CNA	CNA_2:138000001-139000000	0.915529
Gastric	CNA	CNA_2:211000001-212000000	0.916642
Gastric	CNA	CNA_3:5000001-6000000	0.910932
Gastric	CNA	CNA_3:53000001-54000000	0.91056
Gastric	CNA	CNA_3:57000001-58000000	0.905468
Gastric	CNA	CNA_3:109000001-110000000	0.900217
Gastric	CNA	CNA_3:120000001-121000000	0.912616
Gastric	CNA	CNA_3:166000001-167000000	0.902199
Gastric	CNA	CNA_4:38000001-39000000	0.900276
Gastric	CNA	CNA_4:79000001-80000000	0.907844
Gastric	CNA	CNA_4:92000001-93000000	0.925758
Gastric	CNA	CNA_4:143000001-144000000	0.91552
Gastric	CNA	CNA_5:12000001-13000000	0.911436
Gastric	CNA	CNA_5:22000001-23000000	0.904434
Gastric	CNA	CNA_5:70000001-71000000	0.923738
Gastric	CNA	CNA_5:152000001-153000000	0.904427
Gastric	CNA	CNA_6:71000001-72000000	0.918377
Gastric	CNA	CNA_6:111000001-112000000	0.915957
Gastric	CNA	CNA_7:66000001-67000000	0.901335
Gastric	CNA	CNA_7:79000001-80000000	0.901282
Gastric	CNA	CNA_7:85000001-86000000	0.922788
Gastric	CNA	CNA_7:109000001-110000000	0.909698
Gastric	CNA	CNA_8:122000001-123000000	0.92105
Gastric	CNA	CNA_8:136000001-137000000	0.901437
Gastric	CNA	CNA_9:11000001-12000000	0.91952
Gastric	CNA	CNA_9:36000001-37000000	0.90543
Gastric	CNA	CNA_10:83000001-84000000	0.921923
Gastric	CNA	CNA_10:112000001-113000000	0.91457
Gastric	CNA	CNA_11:78000001-79000000	0.930052
Gastric	CNA	CNA_11:90000001-91000000	0.907637
Gastric	CNA	CNA_11:111000001-112000000	0.907255
Gastric	CNA	CNA_11:122000001-123000000	0.920371
Gastric	CNA	CNA_12:16000001-17000000	0.901568
Gastric	CNA	CNA_12:48000001-49000000	0.922861
Gastric	CNA	CNA_12:98000001-99000000	0.926734
Gastric	CNA	CNA_12:107000001-108000000	0.901819
Gastric	CNA	CNA_12:131000001-132000000	0.907738
Gastric	CNA	CNA_15:28000001-29000000	0.91601
Gastric	CNA	CNA_17:57000001-58000000	0.937598
Gastric	CNA	CNA_18:33000001-34000000	0.905721
Gastric	CNA	CNA_18:42000001-43000000	0.905088
Gastric	CNA	CNA_19:58000001-59000000	0.926392
Gastric	CNA	CNA_20:8000001-9000000	0.915432
Gastric	CNA	CNA_20:36000001-37000000	0.903908
Gastric	CNA	CNA_20:61000001-62000000	0.905778
Gastric	CNA	CNA_22:24000001-25000000	0.916847
Gastric	FLEN	flen_159	0.91353
Gastric	FLEN	flen_187	0.909072
Gastric	SHORT	GWFP_short_2:20000001-25000000	0.90299
Gastric	SHORT	GWFP_short_2:125000001-130000000	0.906291
Gastric	SHORT	GWFP_short_5:175000001-180000000	0.904996
Gastric	SHORT	GWFP_short_8:25000001-30000000	0.904803
Gastric	SHORT	GWFP_short_9:135000001-140000000	0.914263
Gastric	LONG	GWFP_long_1:235000001-240000000	0.913787
Gastric	LONG	GWFP_long_9:135000001-140000000	0.90403
Gastric	LONG	GWFP_long_11:130000001-135000000	0.907282
Gastric	LONG	GWFP_long_13:15000001-20000000	0.928835
Gastric	TOTAL	GWFP_total_3:100000001-105000000	0.900971
Gastric	TOTAL	GWFP_total_7:50000001-55000000	0.904088
Gastric	TOTAL	GWFP_total_8:105000001-110000000	0.913769
Gastric	TOTAL	GWFP_total_9:80000001-85000000	0.904036
Gastric	TOTAL	GWFP_total_13:5000001-10000000	0.900035
Gastric	TOTAL	GWFP_total_16:55000001-60000000	0.923923
Gastric	TOTAL	GWFP_total_17:35000001-40000000	0.916203
Gastric	RATIO	GWFP_ratio_1:40000001-45000000	0.908351
Gastric	RATIO	GWFP_ratio_3:165000001-170000000	0.90441
Gastric	RATIO	GWFP_ratio_6:100000001-105000000	0.93166
Gastric	RATIO	GWFP_ratio_6:170000001-171115067	0.901142
Gastric	RATIO	GWFP_ratio_19:5000001-10000000	0.916024
Gastric	RATIO	GWFP_ratio_20:50000001-55000000	0.90961
Gastric	EM	MOTIF_END_CTTT	0.91353
Gastric	EM	MOTIF_END_GCAT	0.909072
Liver	TM	TMD_109	0.92287
Liver	TM	TMD_121	0.906148
Liver	TM	TMD_272	0.901432
Liver	TM	TMD_306	0.90181
Liver	TM	TMD_332	0.92461
Liver	TM	TMD_425	0.906258
Liver	TM	TMD_427	0.922445
Liver	GWM	GWMD_chr1_5	0.913238
Liver	GWM	GWMD_chr1_35	0.90287
Liver	GWM	GWMD_chr1_85	0.901691
Liver	GWM	GWMD_chr1_96	0.900551
Liver	GWM	GWMD_chr1_103	0.902123
Liver	GWM	GWMD_chr1_111	0.923505
Liver	GWM	GWMD_chr1_174	0.914539
Liver	GWM	GWMD_chr1_177	0.953057
Liver	GWM	GWMD_chr1_225	0.903952
Liver	GWM	GWMD_chr1_250	0.906295
Liver	GWM	GWMD_chr2_4	0.948381
Liver	GWM	GWMD_chr2_25	0.91958
Liver	GWM	GWMD_chr2_51	0.951542
Liver	GWM	GWMD_chr2_68	0.90744
Liver	GWM	GWMD_chr2_75	0.912658
Liver	GWM	GWMD_chr2_97	0.940553
Liver	GWM	GWMD_chr2_165	0.902618
Liver	GWM	GWMD_chr2_192	0.906142
Liver	GWM	GWMD_chr2_230	0.932443
Liver	GWM	GWMD_chr2_243	0.9192
Liver	GWM	GWMD_chr3_22	0.955212
Liver	GWM	GWMD_chr3_66	0.930801
Liver	GWM	GWMD_chr3_88	0.912357
Liver	GWM	GWMD_chr3_95	0.945601
Liver	GWM	GWMD_chr3_148	0.971866
Liver	GWM	GWMD_chr4_11	0.90859
Liver	GWM	GWMD_chr4_126	0.904975
Liver	GWM	GWMD_chr4_144	0.91051
Liver	GWM	GWMD_chr5_6	0.90467
Liver	GWM	GWMD_chr5_15	0.915911
Liver	GWM	GWMD_chr5_16	0.926995
Liver	GWM	GWMD_chr5_25	0.903451
Liver	GWM	GWMD_chr5_65	0.914364
Liver	GWM	GWMD_chr5_70	0.901765
Liver	GWM	GWMD_chr5_76	0.909268
Liver	GWM	GWMD_chr5_77	0.913492
Liver	GWM	GWMD_chr5_111	0.931636
Liver	GWM	GWMD_chr5_121	0.930991
Liver	GWM	GWMD_chr5_131	0.933489
Liver	GWM	GWMD_chr5_157	0.918878
Liver	GWM	GWMD_chr5_165	0.911602
Liver	GWM	GWMD_chr5_171	0.913451
Liver	GWM	GWMD_chr5_177	0.93259
Liver	GWM	GWMD_chr5_179	0.912979
Liver	GWM	GWMD_chr6_3	0.910629
Liver	GWM	GWMD_chr6_46	0.91976
Liver	GWM	GWMD_chr6_114	0.906916
Liver	GWM	GWMD_chr6_117	0.902508
Liver	GWM	GWMD_chr7_34	0.913449
Liver	GWM	GWMD_chr7_42	0.90624
Liver	GWM	GWMD_chr7_51	0.937958
Liver	GWM	GWMD_chr7_62	0.973354
Liver	GWM	GWMD_chr7_72	0.924174
Liver	GWM	GWMD_chr7_85	0.912299
Liver	GWM	GWMD_chr7_92	0.910346
Liver	GWM	GWMD_chr7_105	0.908446
Liver	GWM	GWMD_chr8_30	0.902532
Liver	GWM	GWMD_chr8_31	0.914871
Liver	GWM	GWMD_chr8_36	0.920316
Liver	GWM	GWMD_chr8_78	0.901844
Liver	GWM	GWMD_chr9_11	0.910009
Liver	GWM	GWMD_chr9_23	0.901887
Liver	GWM	GWMD_chr9_44	0.921877
Liver	GWM	GWMD_chr9_88	0.927462
Liver	GWM	GWMD_chr9_107	0.908595
Liver	GWM	GWMD_chr9_131	0.905893
Liver	GWM	GWMD_chr9_141	0.91863
Liver	GWM	GWMD_chr10_18	0.913537
Liver	GWM	GWMD_chr10_80	0.908151
Liver	GWM	GWMD_chr10_102	0.900023
Liver	GWM	GWMD_chr10_104	0.911665
Liver	GWM	GWMD_chr10_113	0.925857
Liver	GWM	GWMD_chr10_129	0.926907
Liver	GWM	GWMD_chr11_15	0.906776
Liver	GWM	GWMD_chr11_24	0.91346
Liver	GWM	GWMD_chr11_32	0.91352
Liver	GWM	GWMD_chr11_37	0.900949
Liver	GWM	GWMD_chr11_67	0.932383
Liver	GWM	GWMD_chr11_83	0.932566
Liver	GWM	GWMD_chr11_105	0.928408
Liver	GWM	GWMD_chr11_134	0.928245
Liver	GWM	GWMD_chr12_23	0.910234
Liver	GWM	GWMD_chr12_69	0.900925
Liver	GWM	GWMD_chr12_74	0.936427
Liver	GWM	GWMD_chr12_94	0.923567
Liver	GWM	GWMD_chr13_41	0.910501
Liver	GWM	GWMD_chr13_48	0.903965
Liver	GWM	GWMD_chr13_50	0.902125
Liver	GWM	GWMD_chr13_69	0.907043
Liver	GWM	GWMD_chr13_96	0.911691
Liver	GWM	GWMD_chr14_21	0.926553
Liver	GWM	GWMD_chr14_41	0.901327
Liver	GWM	GWMD_chr14_66	0.925978
Liver	GWM	GWMD_chr14_69	0.945531
Liver	GWM	GWMD_chr14_90	0.906264
Liver	GWM	GWMD_chr15_27	0.913681
Liver	GWM	GWMD_chr15_28	0.904255
Liver	GWM	GWMD_chr15_29	0.90347
Liver	GWM	GWMD_chr15_55	0.944781
Liver	GWM	GWMD_chr15_60	0.909897
Liver	GWM	GWMD_chr15_63	0.930232
Liver	GWM	GWMD_chr15_73	0.944725
Liver	GWM	GWMD_chr15_94	0.900874
Liver	GWM	GWMD_chr16_5	0.909519
Liver	GWM	GWMD_chr16_69	0.915609
Liver	GWM	GWMD_chr16_80	0.909133
Liver	GWM	GWMD_chr16_84	0.922489
Liver	GWM	GWMD_chr17_42	0.938455
Liver	GWM	GWMD_chr17_65	0.931403
Liver	GWM	GWMD_chr17_66	0.957082
Liver	GWM	GWMD_chr17_74	0.921375
Liver	GWM	GWMD_chr18_62	0.930506
Liver	GWM	GWMD_chr19_6	0.90087
Liver	GWM	GWMD_chr19_25	0.947282
Liver	GWM	GWMD_chr20_35	0.904278
Liver	GWM	GWMD_chr21_24	0.900954
Liver	GWM	GWMD_chr22_46	0.906423
Liver	CNA	CNA_1:22000001-23000000	0.905584
Liver	CNA	CNA_1:35000001-36000000	0.917012
Liver	CNA	CNA_1:37000001-38000000	0.931876
Liver	CNA	CNA_1:56000001-57000000	0.924008
Liver	CNA	CNA_1:63000001-64000000	0.911286
Liver	CNA	CNA_1:65000001-66000000	0.91602
Liver	CNA	CNA_1:96000001-97000000	0.918648
Liver	CNA	CNA_1:162000001-163000000	0.954303
Liver	CNA	CNA_1:230000001-231000000	0.932637
Liver	CNA	CNA_1:245000001-246000000	0.902353
Liver	CNA	CNA_2:22000001-23000000	0.9155
Liver	CNA	CNA_2:35000001-36000000	0.934608
Liver	CNA	CNA_2:102000001-103000000	0.935239
Liver	CNA	CNA_2:199000001-200000000	0.90052
Liver	CNA	CNA_2:210000001-211000000	0.907835
Liver	CNA	CNA_2:212000001-213000000	0.900816
Liver	CNA	CNA_2:223000001-224000000	0.903397
Liver	CNA	CNA_2:240000001-241000000	0.911281
Liver	CNA	CNA_3:9000001-10000000	0.903816
Liver	CNA	CNA_3:87000001-88000000	0.912811
Liver	CNA	CNA_3:157000001-158000000	0.928253
Liver	CNA	CNA_3:159000001-160000000	0.927616
Liver	CNA	CNA_3:176000001-177000000	0.900552
Liver	CNA	CNA_3:183000001-184000000	0.947429
Liver	CNA	CNA_4:19000001-20000000	0.91739
Liver	CNA	CNA_4:35000001-36000000	0.905799
Liver	CNA	CNA_4:66000001-67000000	0.961164
Liver	CNA	CNA_4:78000001-79000000	0.917988
Liver	CNA	CNA_4:98000001-99000000	0.928363
Liver	CNA	CNA_4:186000001-187000000	0.937259
Liver	CNA	CNA_5:14000001-15000000	0.910086
Liver	CNA	CNA_5:67000001-68000000	0.922696
Liver	CNA	CNA_5:75000001-76000000	0.922797
Liver	CNA	CNA_5:76000001-77000000	0.902256
Liver	CNA	CNA_5:81000001-82000000	0.917121
Liver	CNA	CNA_5:105000001-106000000	0.901094
Liver	CNA	CNA_5:106000001-107000000	0.915611
Liver	CNA	CNA_5:151000001-152000000	0.93365
Liver	CNA	CNA_5:155000001-156000000	0.902786
Liver	CNA	CNA_6:39000001-40000000	0.919859
Liver	CNA	CNA_6:45000001-46000000	0.948793
Liver	CNA	CNA_6:67000001-68000000	0.936267
Liver	CNA	CNA_6:111000001-112000000	0.902719
Liver	CNA	CNA_6:132000001-133000000	0.902817
Liver	CNA	CNA_7:28000001-29000000	0.90476
Liver	CNA	CNA_7:34000001-35000000	0.905884
Liver	CNA	CNA_7:35000001-36000000	0.902041
Liver	CNA	CNA_7:79000001-80000000	0.906097
Liver	CNA	CNA_7:81000001-82000000	0.906947
Liver	CNA	CNA_7:104000001-105000000	0.922691
Liver	CNA	CNA_7:109000001-110000000	0.925524
Liver	CNA	CNA_7:127000001-128000000	0.905507
Liver	CNA	CNA_7:136000001-137000000	0.927061
Liver	CNA	CNA_8:14000001-15000000	0.967351
Liver	CNA	CNA_8:28000001-29000000	0.904414
Liver	CNA	CNA_8:51000001-52000000	0.915581
Liver	CNA	CNA_8:98000001-99000000	0.916625
Liver	CNA	CNA_8:99000001-100000000	0.919016
Liver	CNA	CNA_8:104000001-105000000	0.944126
Liver	CNA	CNA_8:106000001-107000000	0.903808
Liver	CNA	CNA_9:21000001-22000000	0.934519
Liver	CNA	CNA_10:6000001-7000000	0.90284
Liver	CNA	CNA_10:46000001-47000000	0.903203
Liver	CNA	CNA_10:49000001-50000000	0.934329
Liver	CNA	CNA_10:72000001-73000000	0.921505
Liver	CNA	CNA_10:79000001-80000000	0.909577
Liver	CNA	CNA_10:102000001-103000000	0.912365
Liver	CNA	CNA_10:103000001-104000000	0.90386
Liver	CNA	CNA_10:121000001-122000000	0.914512
Liver	CNA	CNA_10:131000001-132000000	0.940997
Liver	CNA	CNA_11:24000001-25000000	0.92756
Liver	CNA	CNA_11:25000001-26000000	0.926578
Liver	CNA	CNA_11:49000001-50000000	0.910734
Liver	CNA	CNA_11:65000001-66000000	0.934242
Liver	CNA	CNA_11:104000001-105000000	0.913441
Liver	CNA	CNA_12:58000001-59000000	0.912198
Liver	CNA	CNA_12:98000001-99000000	0.902977
Liver	CNA	CNA_12:130000001-131000000	0.912065
Liver	CNA	CNA_13:19000001-20000000	0.946104
Liver	CNA	CNA_13:23000001-24000000	0.900134
Liver	CNA	CNA_13:35000001-36000000	0.914122
Liver	CNA	CNA_13:67000001-68000000	0.923504
Liver	CNA	CNA_13:81000001-82000000	0.91173
Liver	CNA	CNA_14:24000001-25000000	0.927215
Liver	CNA	CNA_14:37000001-38000000	0.93804
Liver	CNA	CNA_14:48000001-49000000	0.911626
Liver	CNA	CNA_14:52000001-53000000	0.911541
Liver	CNA	CNA_14:59000001-60000000	0.923472
Liver	CNA	CNA_15:64000001-65000000	0.950287
Liver	CNA	CNA_15:97000001-98000000	0.905914
Liver	CNA	CNA_16:15000001-16000000	0.904219
Liver	CNA	CNA_16:56000001-57000000	0.909564
Liver	CNA	CNA_17:14000001-15000000	0.925358
Liver	CNA	CNA_17:41000001-42000000	0.908793
Liver	CNA	CNA_17:51000001-52000000	0.905615
Liver	CNA	CNA_17:62000001-63000000	0.921482
Liver	CNA	CNA_18:2000001-3000000	0.907011
Liver	CNA	CNA_18:33000001-34000000	0.93094
Liver	CNA	CNA_18:40000001-41000000	0.924736
Liver	CNA	CNA_18:42000001-43000000	0.904358
Liver	CNA	CNA_18:57000001-58000000	0.910968
Liver	CNA	CNA_18:60000001-61000000	0.903079
Liver	CNA	CNA_19:59000001-59128983	0.901495
Liver	CNA	CNA_20:1000001-2000000	0.914599
Liver	CNA	CNA_21:43000001-44000000	0.94861
Liver	CNA	CNA_22:20000001-21000000	0.920498
Liver	CNA	CNA_22:38000001-39000000	0.932202
Liver	FLEN	flen_149	0.901171
Liver	SHORT	GWFP_short_1:35000001-40000000	0.940619
Liver	SHORT	GWFP_short_1:140000001-145000000	0.916967
Liver	SHORT	GWFP_short_1:220000001-225000000	0.909722
Liver	SHORT	GWFP_short_2:85000001-90000000	0.922866
Liver	SHORT	GWFP_short_4:70000001-75000000	0.922163
Liver	SHORT	GWFP_short_5:130000001-135000000	0.937088
Liver	SHORT	GWFP_short_6:140000001-145000000	0.901877
Liver	SHORT	GWFP_short_9:40000001-45000000	0.902245
Liver	SHORT	GWFP_short_11:120000001-125000000	0.910955
Liver	SHORT	GWFP_short_14:100000001-105000000	0.967497
Liver	SHORT	GWFP_short_15:95000001-100000000	0.907799
Liver	SHORT	GWFP_short_20:55000001-60000000	0.916201
Liver	SHORT	GWFP_short_20:60000001-63025520	0.906174
Liver	SHORT	GWFP_short_21:5000001-10000000	0.905603
Liver	LONG	GWFP_long_1:25000001-30000000	0.909162
Liver	LONG	GWFP_long_1:110000001-115000000	0.907911
Liver	LONG	GWFP_long_2:200000001-205000000	0.98276
Liver	LONG	GWFP_long_3:180000001-185000000	0.902092
Liver	LONG	GWFP_long_4:30000001-35000000	0.902801
Liver	LONG	GWFP_long_4:65000001-70000000	0.906433
Liver	LONG	GWFP_long_4:105000001-110000000	0.914585
Liver	LONG	GWFP_long_4:130000001-135000000	0.921577
Liver	LONG	GWFP_long_8:10000001-15000000	0.94502
Liver	LONG	GWFP_long_8:100000001-105000000	0.925146
Liver	LONG	GWFP_long_8:140000001-145000000	0.968155
Liver	LONG	GWFP_long_11:125000001-130000000	0.926048
Liver	LONG	GWFP_long_12:95000001-100000000	0.90677
Liver	LONG	GWFP_long_13:5000001-10000000	0.908344
Liver	LONG	GWFP_long_15:60000001-65000000	0.915555
Liver	LONG	GWFP_long_17:5000001-10000000	0.914681
Liver	LONG	GWFP_long_18:30000001-35000000	0.918422
Liver	LONG	GWFP_long_20:15000001-20000000	0.923207
Liver	TOTAL	GWFP_total_2:10000001-15000000	0.905206
Liver	TOTAL	GWFP_total_2:25000001-30000000	0.907006
Liver	TOTAL	GWFP_total_3:10000001-15000000	0.923723
Liver	TOTAL	GWFP_total_4:85000001-90000000	0.924011
Liver	TOTAL	GWFP_total_4:105000001-110000000	0.901764
Liver	TOTAL	GWFP_total_5:1-5000000	0.913233
Liver	TOTAL	GWFP_total_7:140000001-145000000	0.909437
Liver	TOTAL	GWFP_total_10:135000001-135534747	0.952847
Liver	TOTAL	GWFP_total_11:15000001-20000000	0.931055
Liver	TOTAL	GWFP_total_13:5000001-10000000	0.936917
Liver	TOTAL	GWFP_total_13:10000001-15000000	0.903303
Liver	TOTAL	GWFP_total_13:15000001-20000000	0.903737
Liver	TOTAL	GWFP_total_14:90000001-95000000	0.93556
Liver	TOTAL	GWFP_total_15:70000001-75000000	0.929347
Liver	TOTAL	GWFP_total_17:35000001-40000000	0.90008
Liver	TOTAL	GWFP_total_18:30000001-35000000	0.924503
Liver	RATIO	GWFP_ratio_1:85000001-90000000	0.904172
Liver	RATIO	GWFP_ratio_1:105000001-110000000	0.913895
Liver	RATIO	GWFP_ratio_2:95000001-100000000	0.923084
Liver	RATIO	GWFP_ratio_2:105000001-110000000	0.900424
Liver	RATIO	GWFP_ratio_2:110000001-115000000	0.929994
Liver	RATIO	GWFP_ratio_2:145000001-150000000	0.915685
Liver	RATIO	GWFP_ratio_3:5000001-10000000	0.904025
Liver	RATIO	GWFP_ratio_4:130000001-135000000	0.917164
Liver	RATIO	GWFP_ratio_4:175000001-180000000	0.905742
Liver	RATIO	GWFP_ratio_6:5000001-10000000	0.908172
Liver	RATIO	GWFP_ratio_6:65000001-70000000	0.900533
Liver	RATIO	GWFP_ratio_7:80000001-85000000	0.905401
Liver	RATIO	GWFP_ratio_11:80000001-85000000	0.90246
Liver	RATIO	GWFP_ratio_12:10000001-15000000	0.923314
Liver	RATIO	GWFP_ratio_12:25000001-30000000	0.921478
Liver	RATIO	GWFP_ratio_12:35000001-40000000	0.907051
Liver	RATIO	GWFP_ratio_13:75000001-80000000	0.914405
Liver	RATIO	GWFP_ratio_14:35000001-40000000	0.90553
Liver	RATIO	GWFP_ratio_14:95000001-100000000	0.910218
Liver	RATIO	GWFP_ratio_14:105000001-107349540	0.911878
Liver	RATIO	GWFP_ratio_16:50000001-55000000	0.904871
Liver	RATIO	GWFP_ratio_16:60000001-65000000	0.916899
Liver	RATIO	GWFP_ratio_17:70000001-75000000	0.915655
Liver	RATIO	GWFP_ratio_18:15000001-20000000	0.907867
Liver	RATIO	GWFP_ratio_20:35000001-40000000	0.909842
Liver	RATIO	GWFP_ratio_20:60000001-63025520	0.903997
Liver	RATIO	GWFP_ratio_21:35000001-40000000	0.928332
Liver	RATIO	GWFP_ratio_22:30000001-35000000	0.90529
Liver	RATIO	GWFP_ratio_22:45000001-50000000	0.907239
Liver	EM	MOTIF_END_CACC	0.901171
Lung	TM	TMD_25	0.906041
Lung	TM	TMD_64	0.902875
Lung	TM	TMD_99	0.902758
Lung	TM	TMD_106	0.915896
Lung	TM	TMD_229	0.900013
Lung	GWM	GWMD_chr1_36	0.905496
Lung	GWM	GWMD_chr1_77	0.911363
Lung	GWM	GWMD_chr1_79	0.915083
Lung	GWM	GWMD_chr1_93	0.960406
Lung	GWM	GWMD_chr2_9	0.922904
Lung	GWM	GWMD_chr2_14	0.908418
Lung	GWM	GWMD_chr2_63	0.902857
Lung	GWM	GWMD_chr2_85	0.904089
Lung	GWM	GWMD_chr2_120	0.900478
Lung	GWM	GWMD_chr2_163	0.913643
Lung	GWM	GWMD_chr2_165	0.917949
Lung	GWM	GWMD_chr2_192	0.926117
Lung	GWM	GWMD_chr2_199	0.963982
Lung	GWM	GWMD_chr2_205	0.90102
Lung	GWM	GWMD_chr3_20	0.901991
Lung	GWM	GWMD_chr3_63	0.901548
Lung	GWM	GWMD_chr3_190	0.901827
Lung	GWM	GWMD_chr4_29	0.968076
Lung	GWM	GWMD_chr4_61	0.914987
Lung	GWM	GWMD_chr4_77	0.907051
Lung	GWM	GWMD_chr4_83	0.924913
Lung	GWM	GWMD_chr4_100	0.972582
Lung	GWM	GWMD_chr4_145	0.907895
Lung	GWM	GWMD_chr5_15	0.925013
Lung	GWM	GWMD_chr5_21	0.908826
Lung	GWM	GWMD_chr5_131	0.901194
Lung	GWM	GWMD_chr5_137	0.917122
Lung	GWM	GWMD_chr5_146	0.906599
Lung	GWM	GWMD_chr5_169	0.909495
Lung	GWM	GWMD_chr6_32	0.901578
Lung	GWM	GWMD_chr6_39	0.93878
Lung	GWM	GWMD_chr6_86	0.915519
Lung	GWM	GWMD_chr6_126	0.91118
Lung	GWM	GWMD_chr6_133	0.914999
Lung	GWM	GWMD_chr6_135	0.929368
Lung	GWM	GWMD_chr7_15	0.90503
Lung	GWM	GWMD_chr7_35	0.949119
Lung	GWM	GWMD_chr7_49	0.935069
Lung	GWM	GWMD_chr7_152	0.951173
Lung	GWM	GWMD_chr8_13	0.912468
Lung	GWM	GWMD_chr9_22	0.904209
Lung	GWM	GWMD_chr9_105	0.929948
Lung	GWM	GWMD_chr10_9	0.910619
Lung	GWM	GWMD_chr10_30	0.902558
Lung	GWM	GWMD_chr10_83	0.90154
Lung	GWM	GWMD_chr10_93	0.904418
Lung	GWM	GWMD_chr11_18	0.910769
Lung	GWM	GWMD_chr11_31	0.929457
Lung	GWM	GWMD_chr11_47	0.928639
Lung	GWM	GWMD_chr11_105	0.924915
Lung	GWM	GWMD_chr11_118	0.904897
Lung	GWM	GWMD_chr12_30	0.905347
Lung	GWM	GWMD_chr12_39	0.912545
Lung	GWM	GWMD_chr12_44	0.918748
Lung	GWM	GWMD_chr12_82	0.932995
Lung	GWM	GWMD_chr12_89	0.926115
Lung	GWM	GWMD_chr12_94	0.91293
Lung	GWM	GWMD_chr13_68	0.905698
Lung	GWM	GWMD_chr13_76	0.93568
Lung	GWM	GWMD_chr13_86	0.900424
Lung	GWM	GWMD_chr13_111	0.901077
Lung	GWM	GWMD_chr14_80	0.911087
Lung	GWM	GWMD_chr14_90	0.911099
Lung	GWM	GWMD_chr15_25	0.916144
Lung	GWM	GWMD_chr15_45	0.915915
Lung	GWM	GWMD_chr15_48	0.915255
Lung	GWM	GWMD_chr15_69	0.914069
Lung	GWM	GWMD_chr16_47	0.918378
Lung	GWM	GWMD_chr17_3	0.916835
Lung	GWM	GWMD_chr17_4	0.900391
Lung	GWM	GWMD_chr17_18	0.922778
Lung	GWM	GWMD_chr17_75	0.916584
Lung	GWM	GWMD_chr18_65	0.90567
Lung	GWM	GWMD_chr20_50	0.916132
Lung	GWM	GWMD_chr20_63	0.945516
Lung	GWM	GWMD_chr21_27	0.904664
Lung	GWM	GWMD_chr22_46	0.903317
Lung	CNA	CNA_1:26000001-27000000	0.907952
Lung	CNA	CNA_1:79000001-80000000	0.95445
Lung	CNA	CNA_1:93000001-94000000	0.903876
Lung	CNA	CNA_1:109000001-110000000	0.92035
Lung	CNA	CNA_1:146000001-147000000	0.921387
Lung	CNA	CNA_1:159000001-160000000	0.902306
Lung	CNA	CNA_1:175000001-176000000	0.916758
Lung	CNA	CNA_1:199000001-200000000	0.929707
Lung	CNA	CNA_1:247000001-248000000	0.906526
Lung	CNA	CNA_2:15000001-16000000	0.921436
Lung	CNA	CNA_2:37000001-38000000	0.901354
Lung	CNA	CNA_2:129000001-130000000	0.920243
Lung	CNA	CNA_2:164000001-165000000	0.904271
Lung	CNA	CNA_2:189000001-190000000	0.903141
Lung	CNA	CNA_2:192000001-193000000	0.91267
Lung	CNA	CNA_2:201000001-202000000	0.905984
Lung	CNA	CNA_3:8000001-9000000	0.908908
Lung	CNA	CNA_3:9000001-10000000	0.903555
Lung	CNA	CNA_3:15000001-16000000	0.901351
Lung	CNA	CNA_3:50000001-51000000	0.938181
Lung	CNA	CNA_3:119000001-120000000	0.901414
Lung	CNA	CNA_3:127000001-128000000	0.92413
Lung	CNA	CNA_4:35000001-36000000	0.928152
Lung	CNA	CNA_4:42000001-43000000	0.90845
Lung	CNA	CNA_4:90000001-91000000	0.952147
Lung	CNA	CNA_4:93000001-94000000	0.912879
Lung	CNA	CNA_4:110000001-111000000	0.919192
Lung	CNA	CNA_4:121000001-122000000	0.918474
Lung	CNA	CNA_4:128000001-129000000	0.913853
Lung	CNA	CNA_5:87000001-88000000	0.904065
Lung	CNA	CNA_5:124000001-125000000	0.91033
Lung	CNA	CNA_5:152000001-153000000	0.912802
Lung	CNA	CNA_5:161000001-162000000	0.919959
Lung	CNA	CNA_6:46000001-47000000	0.92637
Lung	CNA	CNA_6:70000001-71000000	0.906407
Lung	CNA	CNA_6:88000001-89000000	0.94098
Lung	CNA	CNA_6:101000001-102000000	0.915273
Lung	CNA	CNA_6:116000001-117000000	0.911089
Lung	CNA	CNA_6:125000001-126000000	0.932299
Lung	CNA	CNA_6:142000001-143000000	0.908013
Lung	CNA	CNA_6:145000001-146000000	0.918418
Lung	CNA	CNA_7:44000001-45000000	0.953753
Lung	CNA	CNA_7:57000001-58000000	0.915263
Lung	CNA	CNA_7:108000001-109000000	0.926303
Lung	CNA	CNA_8:79000001-80000000	0.901369
Lung	CNA	CNA_8:95000001-96000000	0.91699
Lung	CNA	CNA_8:98000001-99000000	0.907849
Lung	CNA	CNA_8:126000001-127000000	0.902904
Lung	CNA	CNA_9:2000001-3000000	0.961274
Lung	CNA	CNA_9:4000001-5000000	0.905189
Lung	CNA	CNA_9:5000001-6000000	0.91504
Lung	CNA	CNA_9:25000001-26000000	0.93609
Lung	CNA	CNA_10:22000001-23000000	0.917283
Lung	CNA	CNA_10:50000001-51000000	0.92009
Lung	CNA	CNA_10:75000001-76000000	0.91199
Lung	CNA	CNA_10:97000001-98000000	0.924761
Lung	CNA	CNA_10:130000001-131000000	0.904797
Lung	CNA	CNA_11:35000001-36000000	0.924007
Lung	CNA	CNA_11:45000001-46000000	0.911817
Lung	CNA	CNA_11:61000001-62000000	0.932041
Lung	CNA	CNA_11:128000001-129000000	0.911413
Lung	CNA	CNA_12:1000001-2000000	0.902858
Lung	CNA	CNA_12:7000001-8000000	0.914297
Lung	CNA	CNA_12:18000001-19000000	0.922398
Lung	CNA	CNA_12:64000001-65000000	0.946081
Lung	CNA	CNA_12:65000001-66000000	0.907428
Lung	CNA	CNA_12:118000001-119000000	0.929227
Lung	CNA	CNA_12:130000001-131000000	0.912898
Lung	CNA	CNA_13:26000001-27000000	0.928782
Lung	CNA	CNA_13:115000001-115169878	0.900322
Lung	CNA	CNA_14:30000001-31000000	0.915894
Lung	CNA	CNA_14:49000001-50000000	0.916117
Lung	CNA	CNA_14:53000001-54000000	0.909199
Lung	CNA	CNA_14:69000001-70000000	0.917609
Lung	CNA	CNA_14:80000001-81000000	0.909024
Lung	CNA	CNA_15:31000001-32000000	0.907416
Lung	CNA	CNA_15:37000001-38000000	0.901831
Lung	CNA	CNA_16:5000001-6000000	0.905529
Lung	CNA	CNA_16:61000001-62000000	0.904277
Lung	CNA	CNA_17:44000001-45000000	0.911863
Lung	CNA	CNA_17:77000001-78000000	0.907597
Lung	CNA	CNA_19:50000001-51000000	0.905308
Lung	CNA	CNA_19:56000001-57000000	0.903622
Lung	CNA	CNA_20:23000001-24000000	0.903394
Lung	CNA	CNA_20:36000001-37000000	0.924883
Lung	CNA	CNA_21:19000001-20000000	0.901772
Lung	CNA	CNA_21:45000001-46000000	0.903177
Lung	FLEN	flen_153	0.924914
Lung	FLEN	flen_187	0.902617
Lung	SHORT	GWFP_short_2:235000001-240000000	0.900607
Lung	SHORT	GWFP_short_4:135000001-140000000	0.903583
Lung	SHORT	GWFP_short_9:130000001-135000000	0.916947
Lung	SHORT	GWFP_short_12:20000001-25000000	0.923119
Lung	SHORT	GWFP_short_17:20000001-25000000	0.901125
Lung	SHORT	GWFP_short_19:50000001-55000000	0.929357
Lung	LONG	GWFP_long_3:40000001-45000000	0.900556
Lung	LONG	GWFP_long_3:145000001-150000000	0.904597
Lung	LONG	GWFP_long_5:145000001-150000000	0.933353
Lung	LONG	GWFP_long_7:25000001-30000000	0.928297
Lung	LONG	GWFP_long_9:95000001-100000000	0.905912
Lung	LONG	GWFP_long_9:125000001-130000000	0.931194
Lung	LONG	GWFP_long_11:55000001-60000000	0.917667
Lung	LONG	GWFP_long_15:40000001-45000000	0.901396
Lung	LONG	GWFP_long_16:30000001-35000000	0.906246
Lung	LONG	GWFP_long_17:80000001-81195210	0.924518
Lung	LONG	GWFP_long_21:5000001-10000000	0.90452
Lung	TOTAL	GWFP_total_2:200000001-205000000	0.909704
Lung	TOTAL	GWFP_total_15:15000001-20000000	0.909565
Lung	TOTAL	GWFP_total_16:50000001-55000000	0.925433
Lung	TOTAL	GWFP_total_16:80000001-85000000	0.904839
Lung	RATIO	GWFP_ratio_2:65000001-70000000	0.919007
Lung	RATIO	GWFP_ratio_3:135000001-140000000	0.923986
Lung	RATIO	GWFP_ratio_6:20000001-25000000	0.936471
Lung	RATIO	GWFP_ratio_7:125000001-130000000	0.911337
Lung	RATIO	GWFP_ratio_7:130000001-135000000	0.922497
Lung	RATIO	GWFP_ratio_8:10000001-15000000	0.923838
Lung	RATIO	GWFP_ratio_10:110000001-115000000	0.903091
Lung	RATIO	GWFP_ratio_12:110000001-115000000	0.925828
Lung	RATIO	GWFP_ratio_12:125000001-130000000	0.923713
Lung	RATIO	GWFP_ratio_13:50000001-55000000	0.909237
Lung	RATIO	GWFP_ratio_15:1-5000000	0.916741
Lung	RATIO	GWFP_ratio_17:65000001-70000000	0.907622
Lung	EM	MOTIF_END_GCAG	0.924914
Lung	EM	MOTIF_END_TCGA	0.902617

[truncated: 1 more sheets: Table S11]
